# Supplementary material
Source: PubMed Central journal article supplement (PMC3843042)

# Total Synthesis and Biological Evaluation of an Antifungal Tricyclic *o*-Hydroxy-*p*-quinone Methide Diterpenoid

Jinhua Huang,<sup>a</sup> Dylan Foyle,<sup>b</sup> Xiaorong Lin,<sup>b</sup> Jiong Yang\*<sup>a</sup>

<sup>a</sup> *Department of Chemistry, Texas A&M University, College Station, Texas 77843-3255*

<sup>b</sup> *Department of Biology, Texas A&M University, College Station, Texas 77843-3258*

## Supporting Information

1. Figure S1-----S2
2. NMR spectra of new compounds-----S3

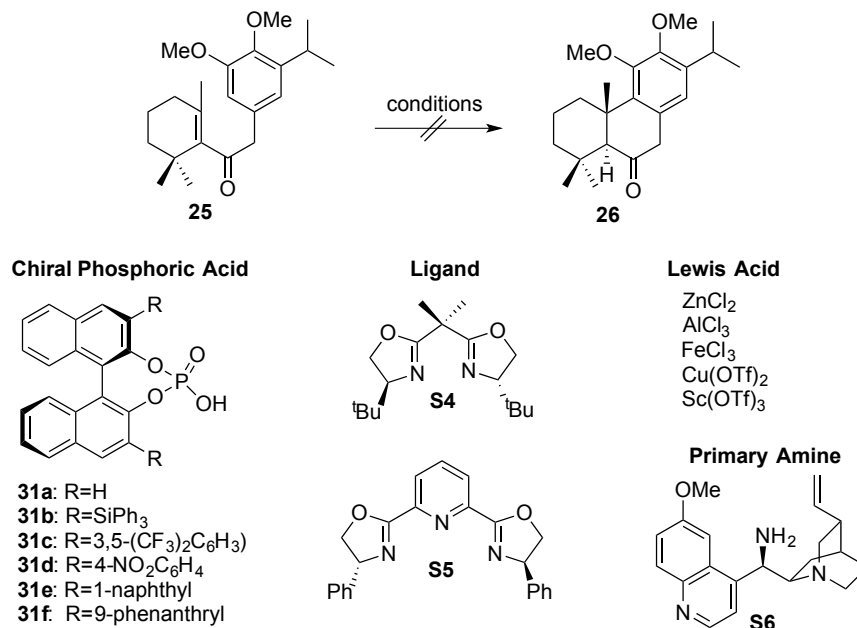

A number of chiral phosphoric acids (**31**), Lewis acids, combination of Lewis acids and ligand (**S4**, **S5**), and a primary amine (**S6**) were tested in various solvents at different temperatures for the Friedel-Crafts alkylation of **25**. However, the desired product (i.e. **26**) was not observed under these conditions.

**Figure S1.** Some other conditions tested for the Friedel-Crafts alkylation of **26**

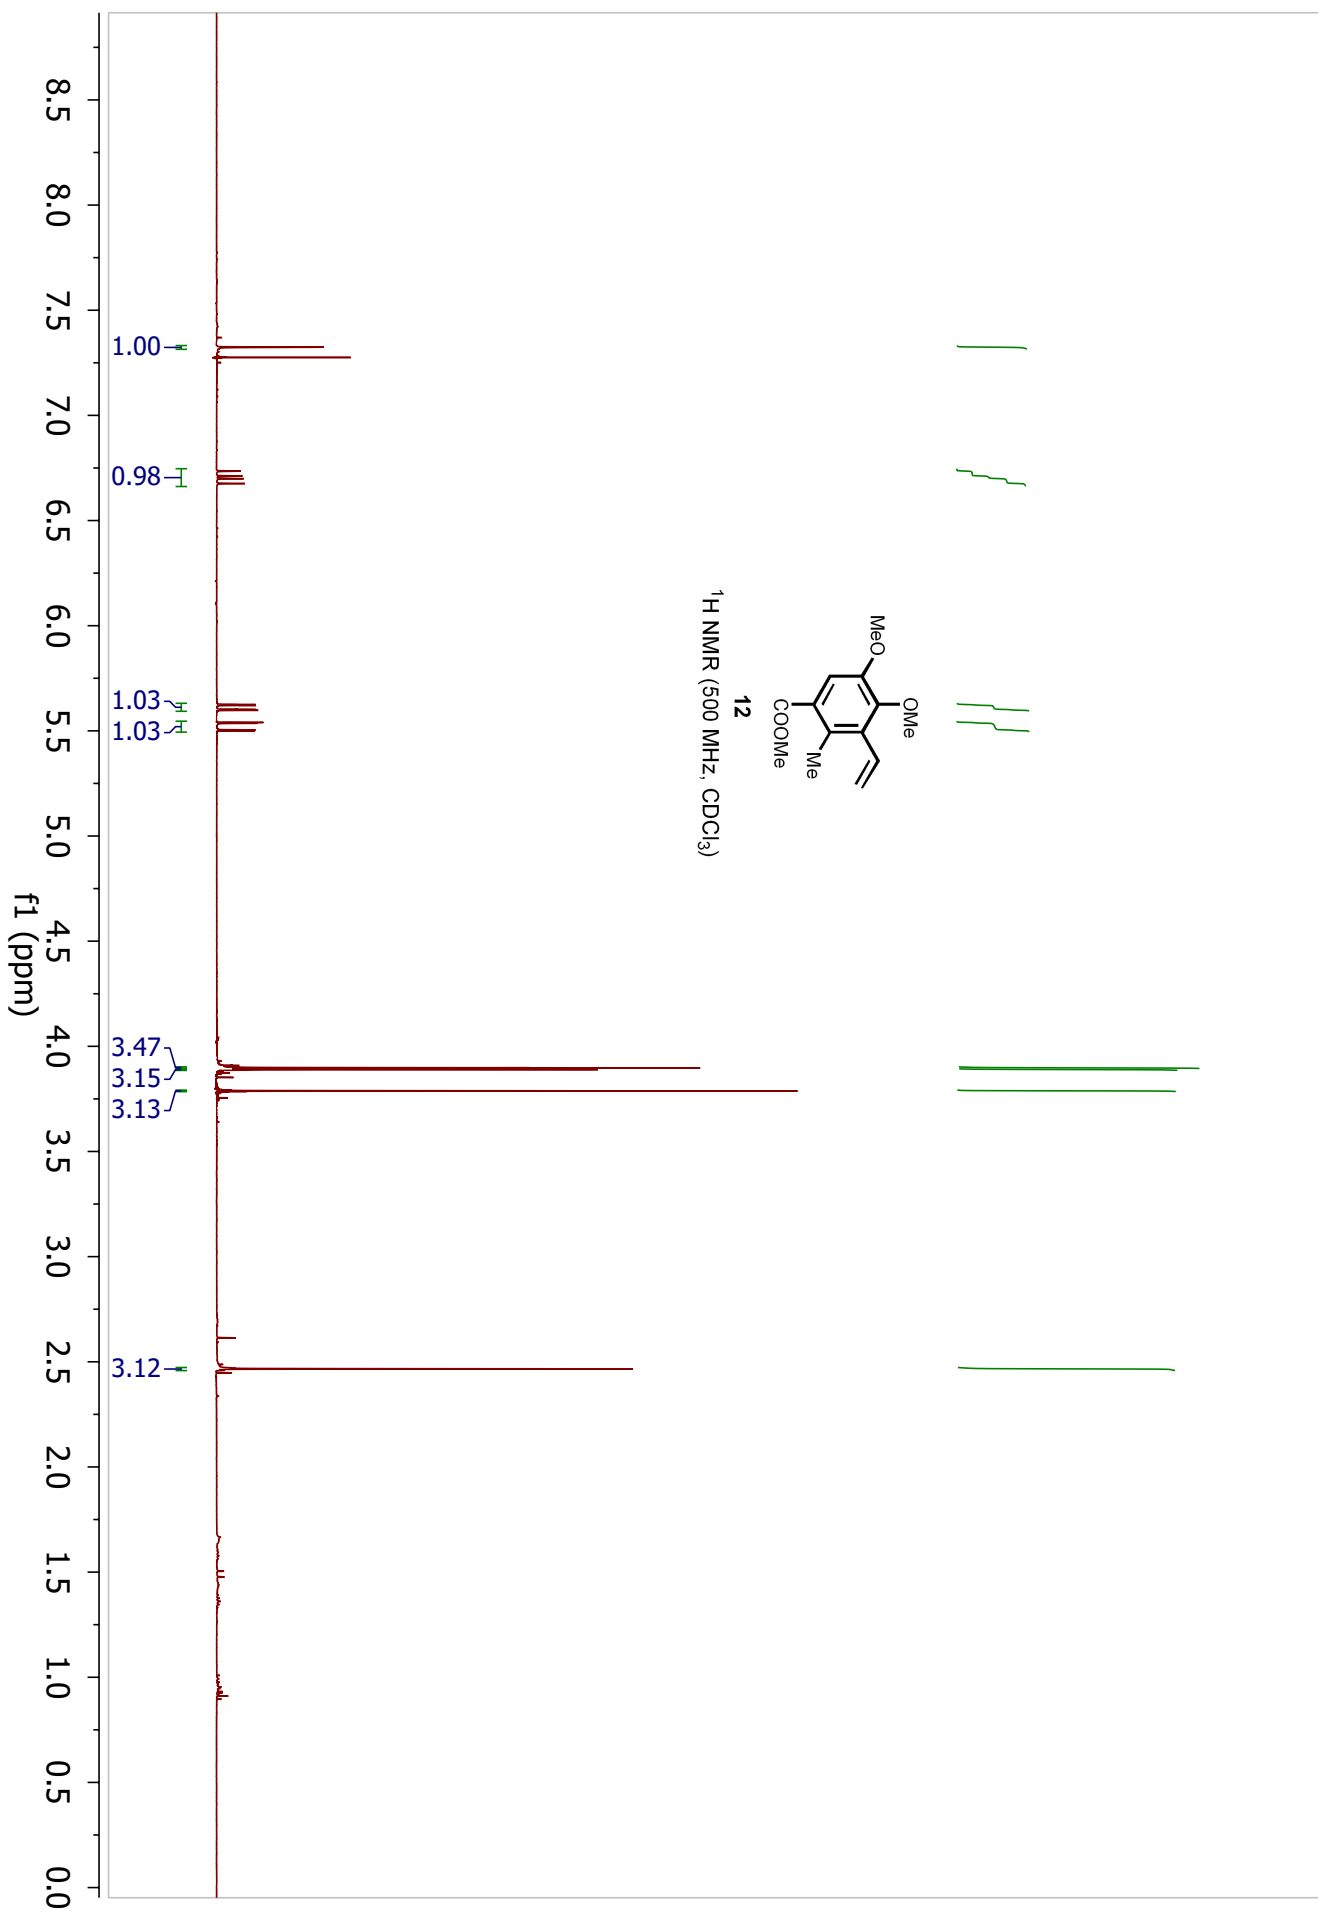

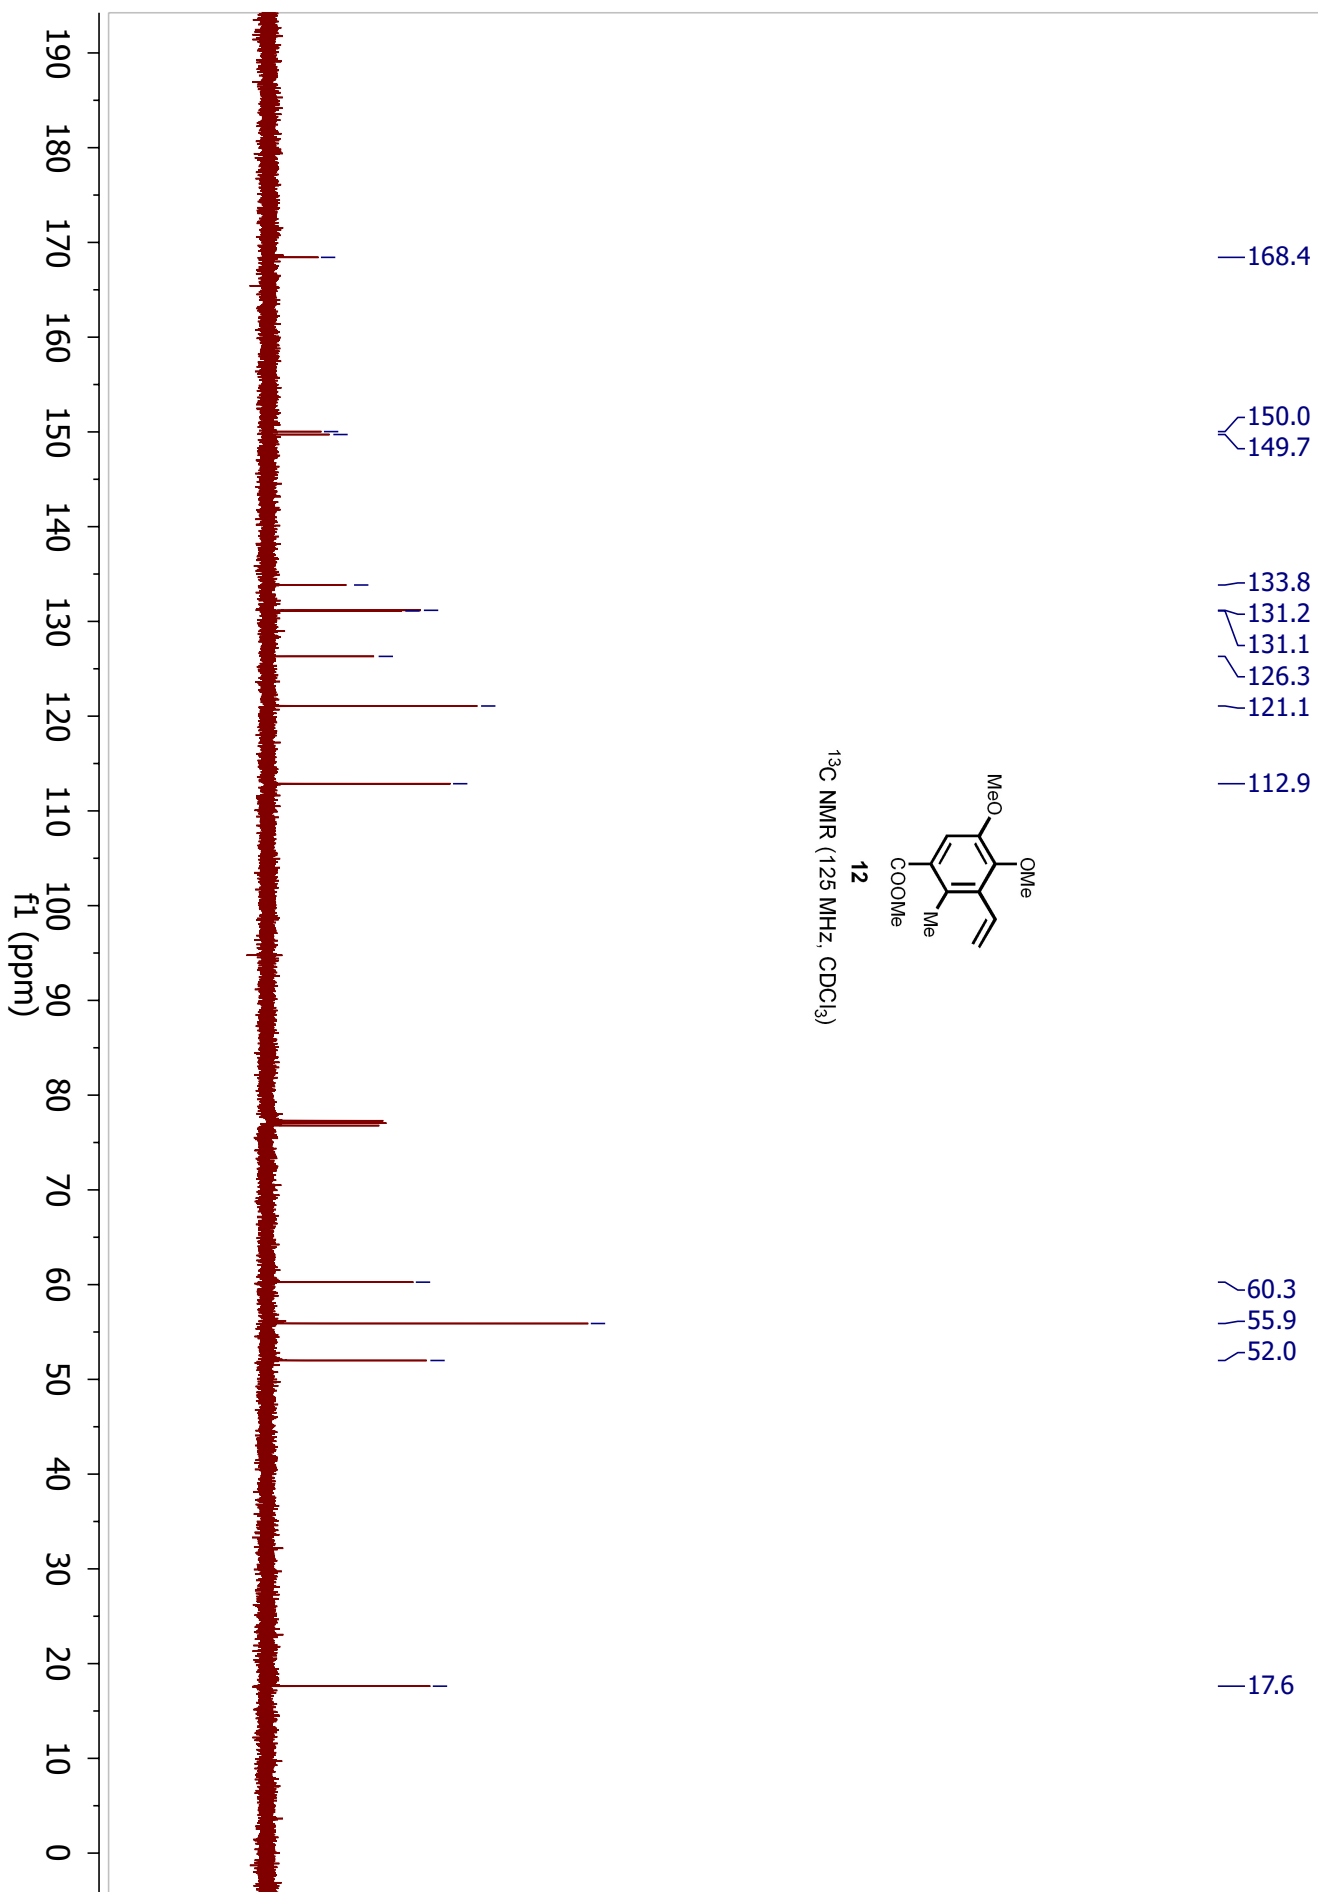



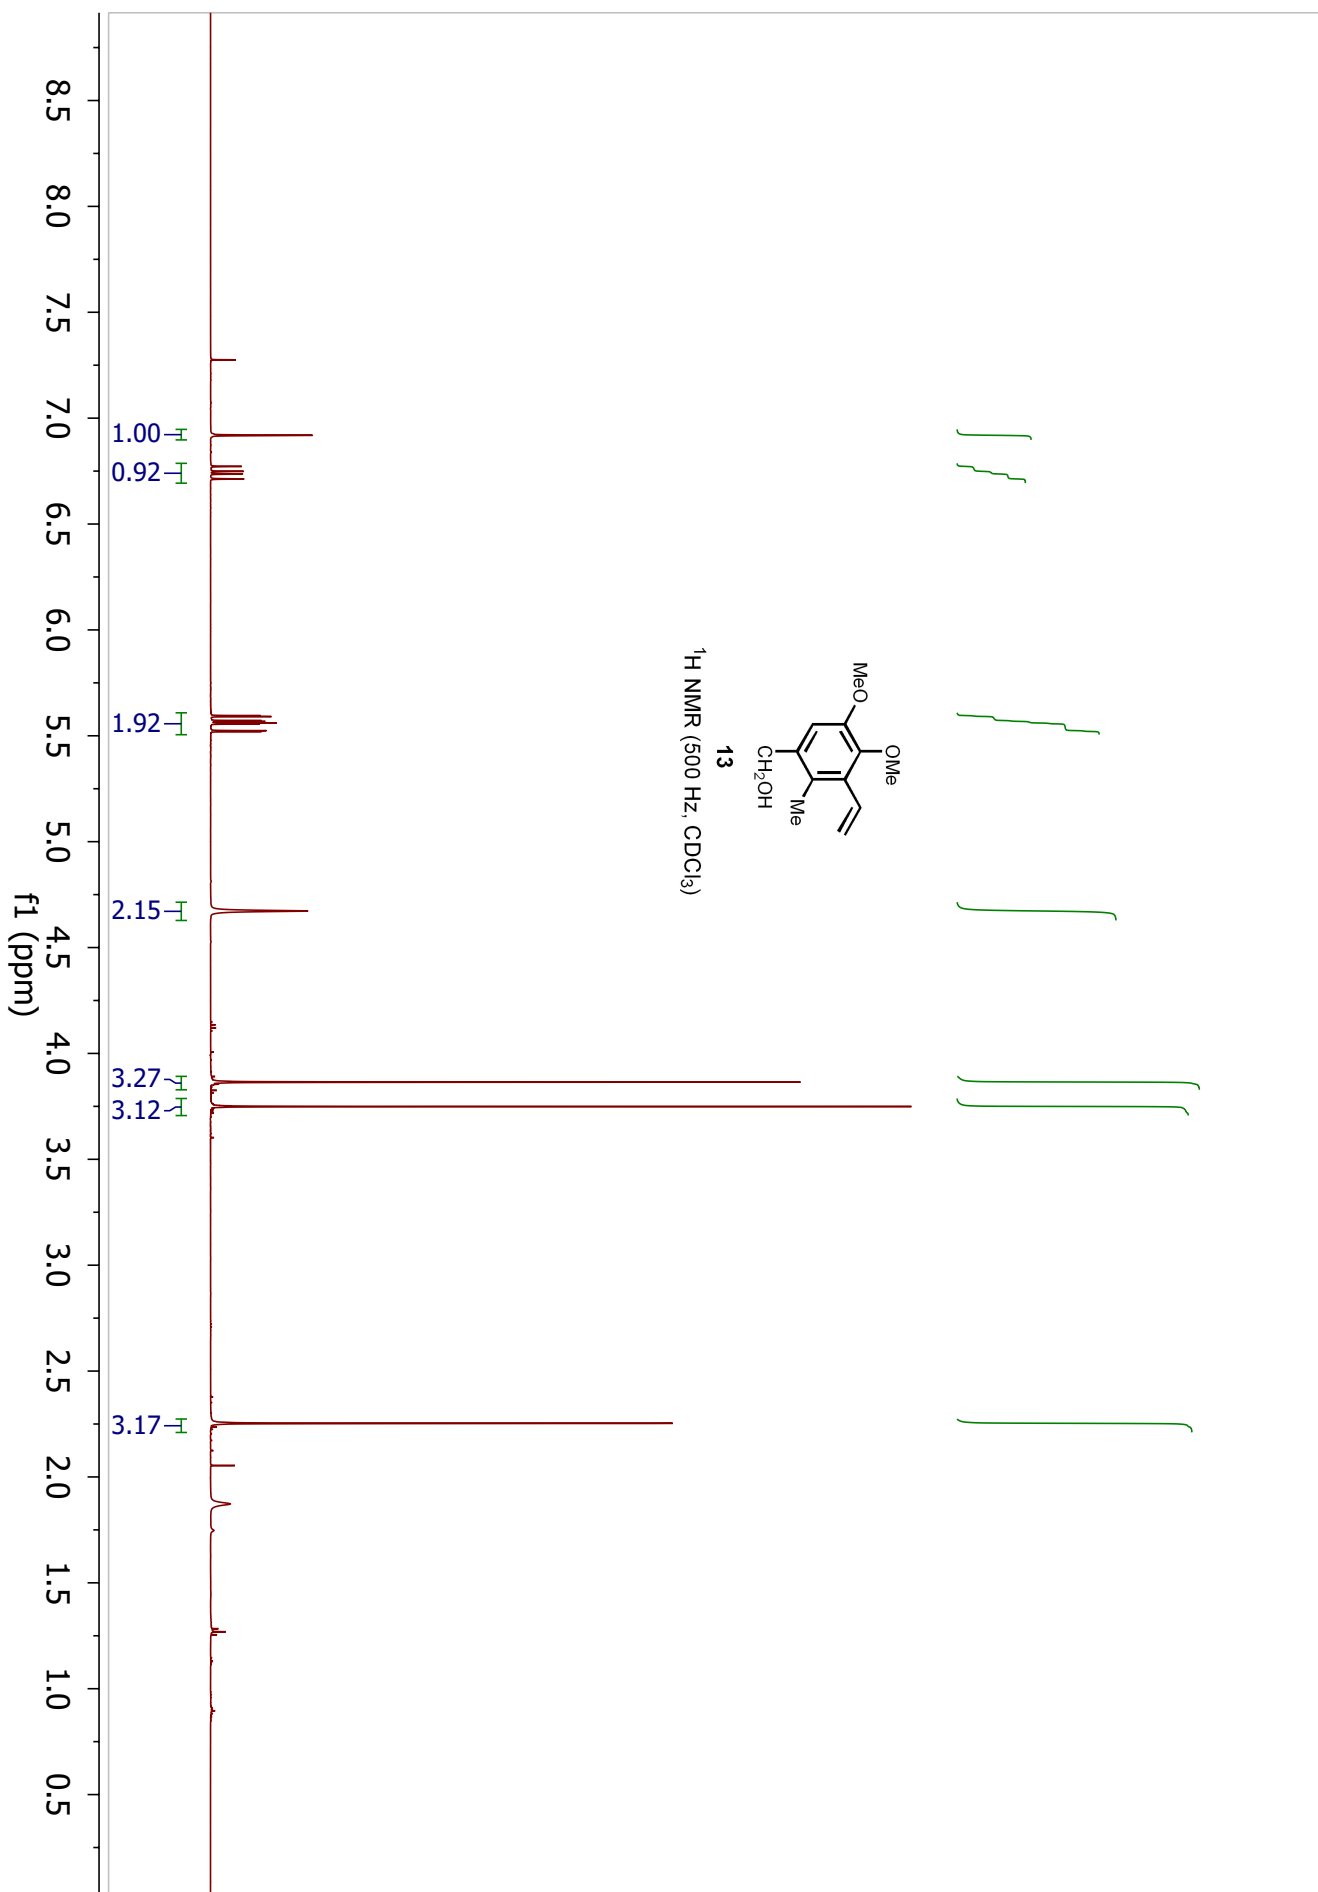

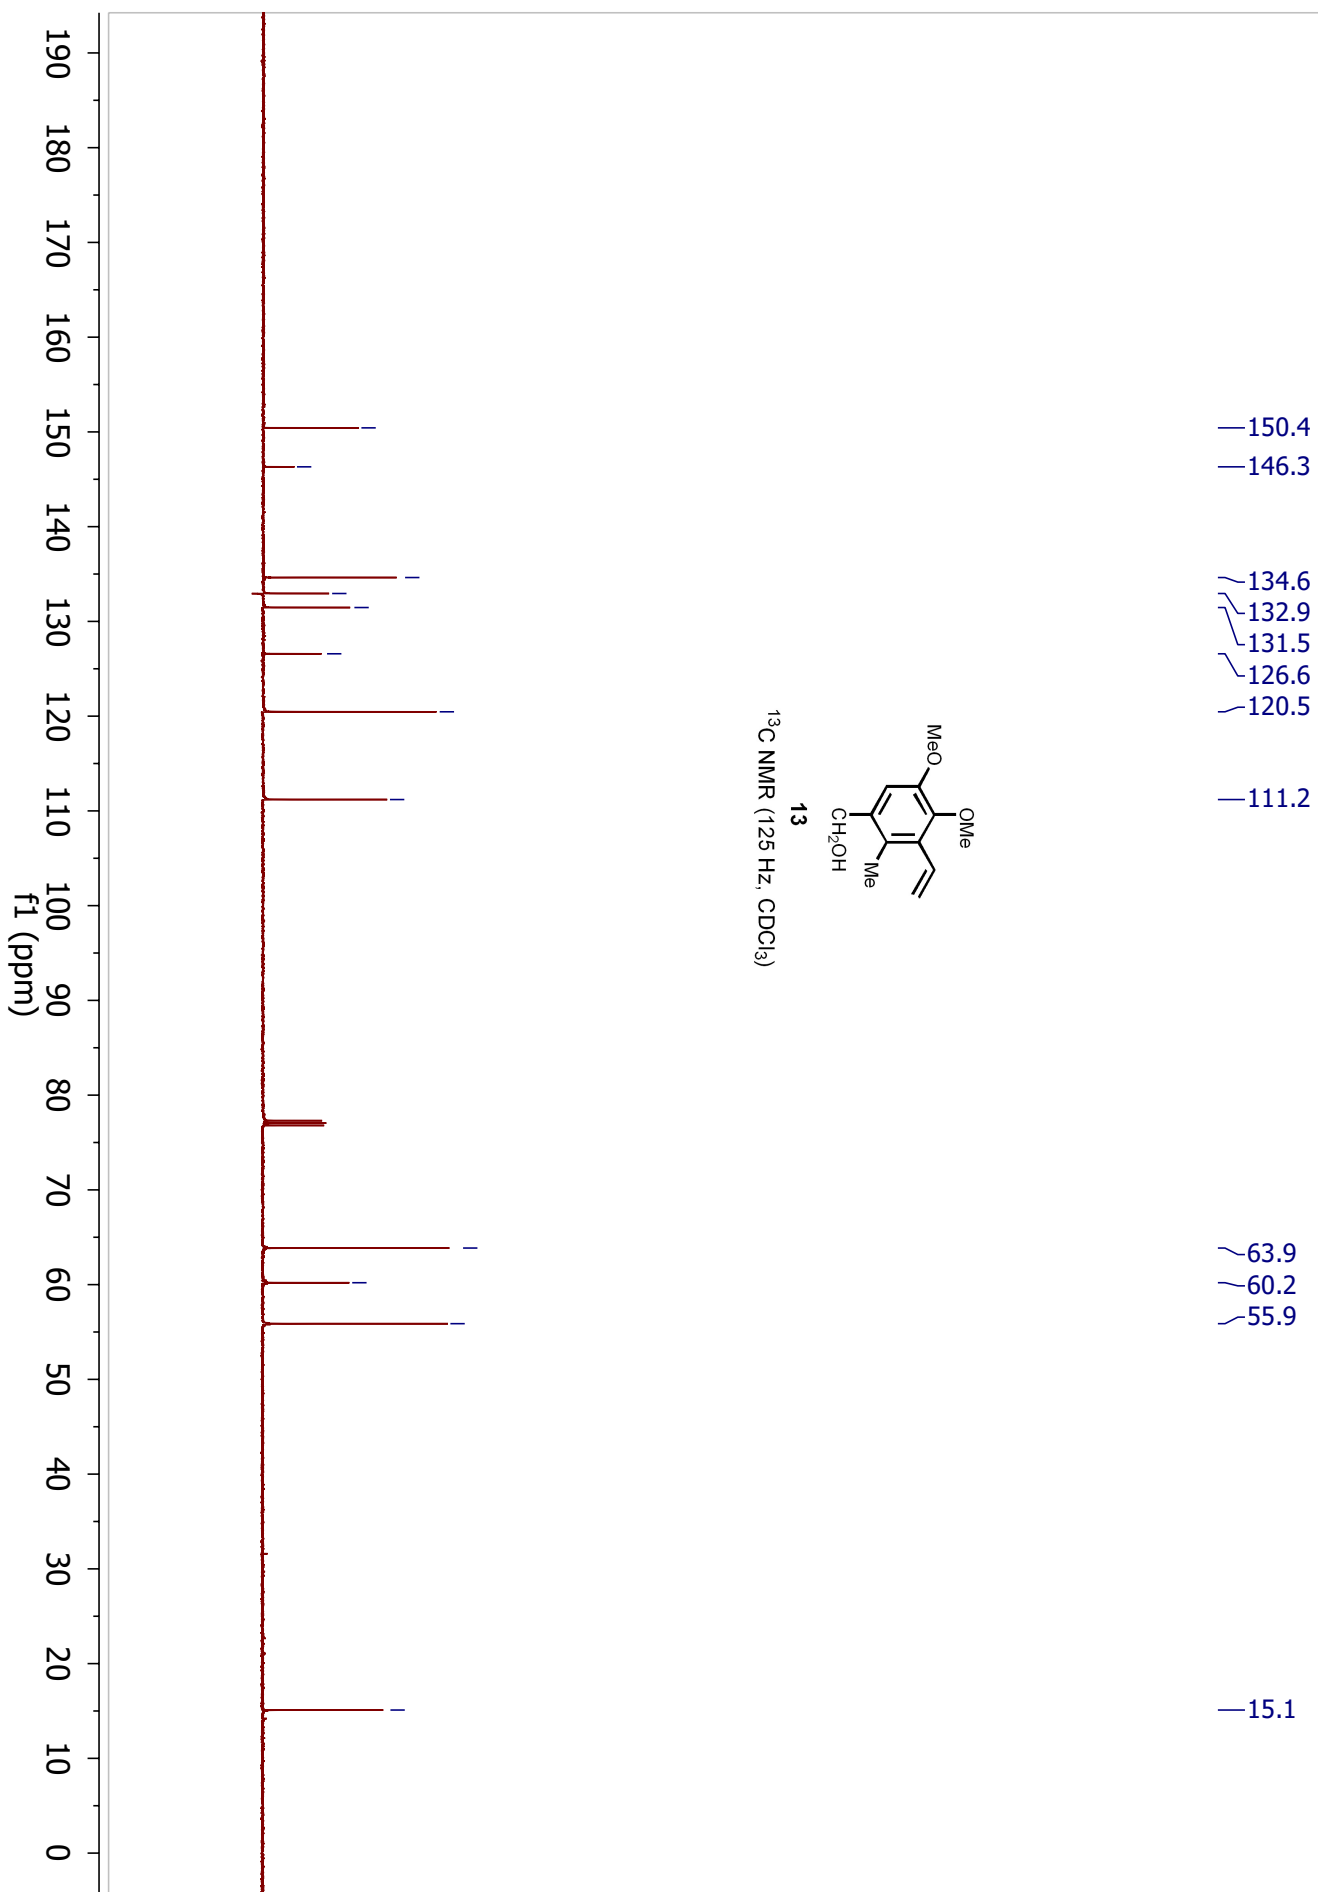

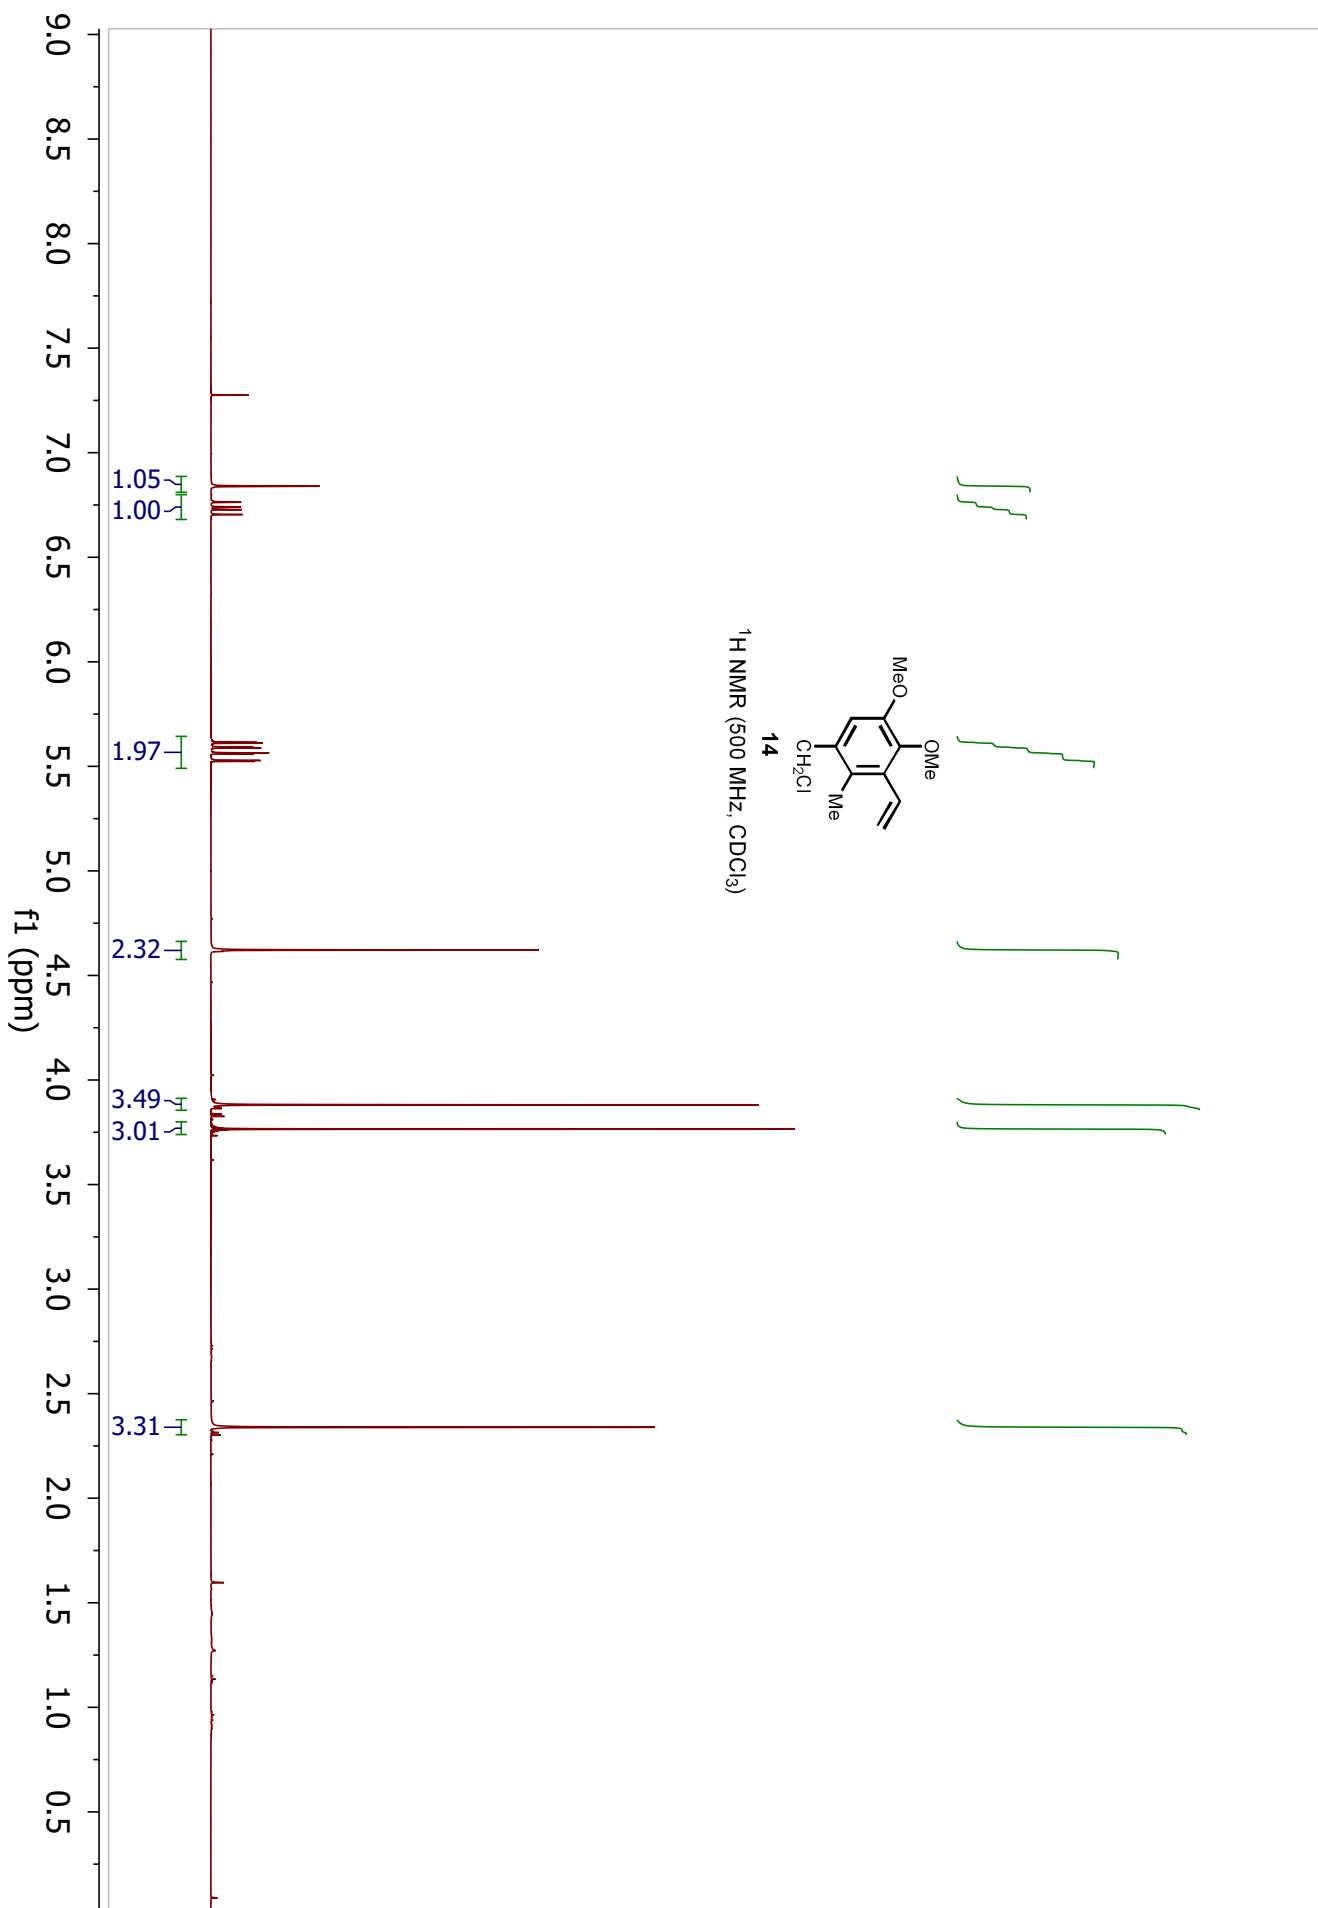

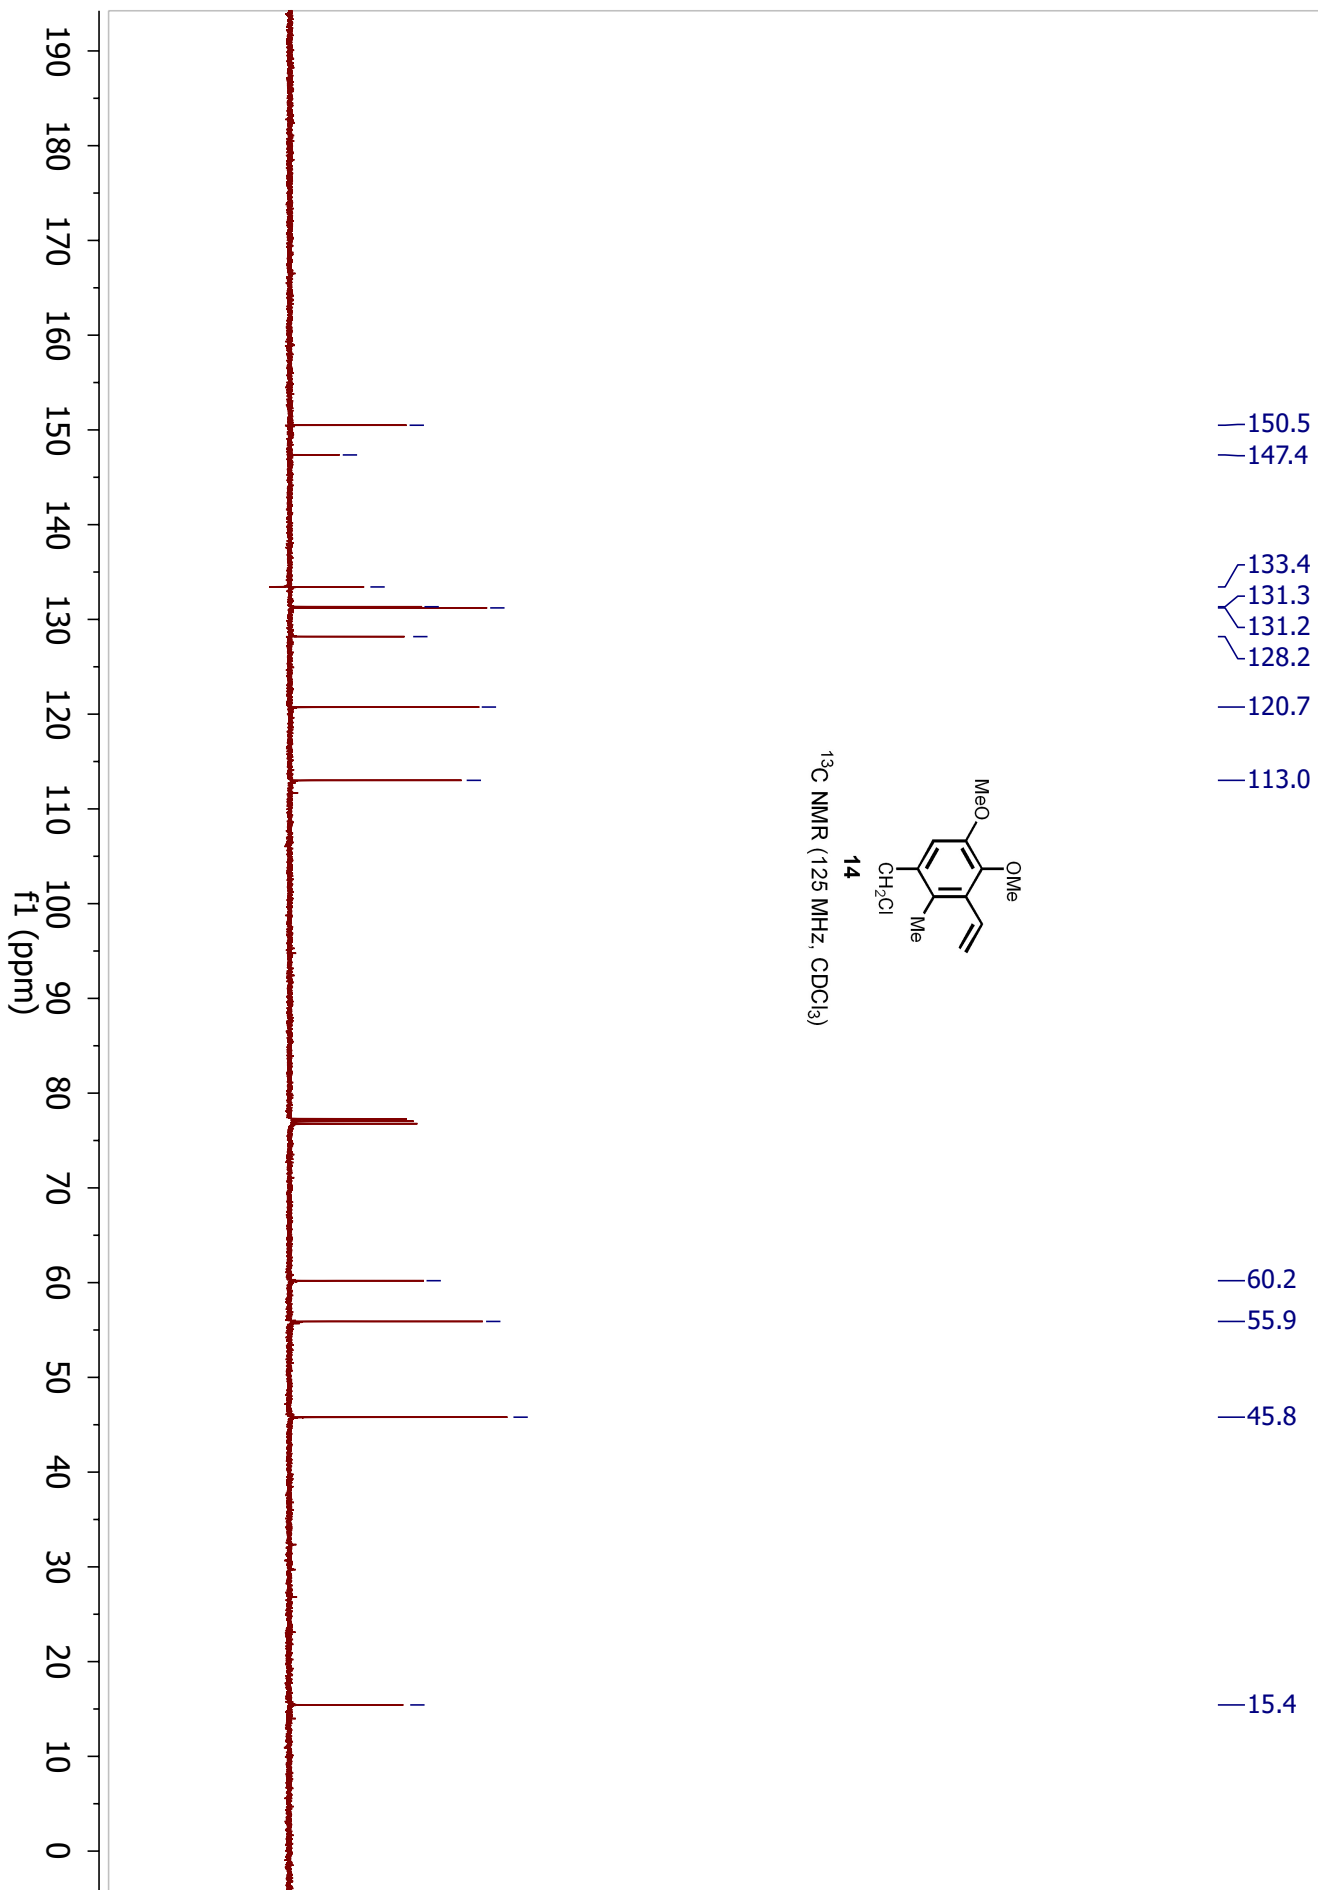

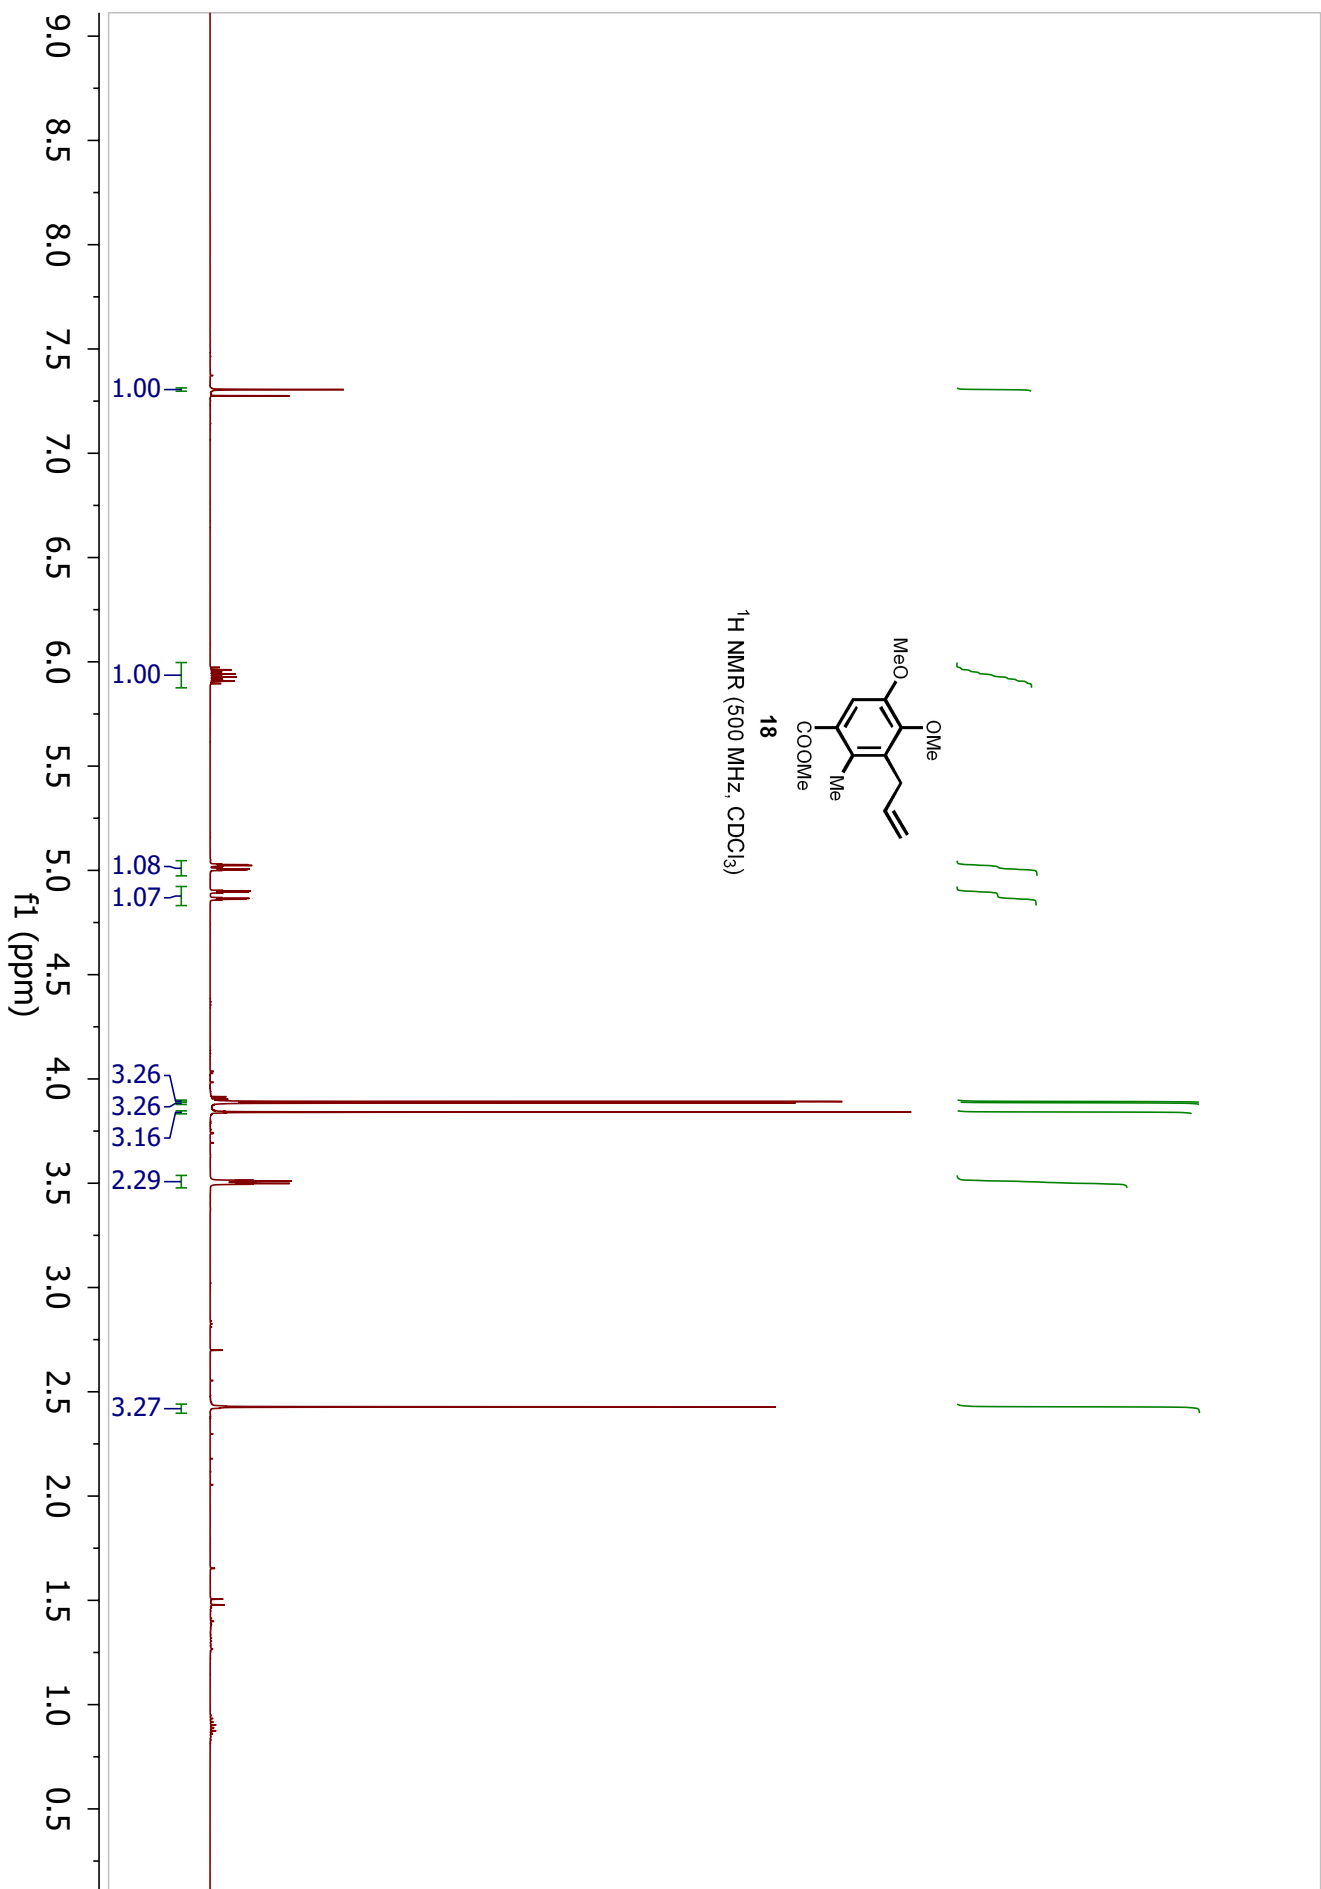

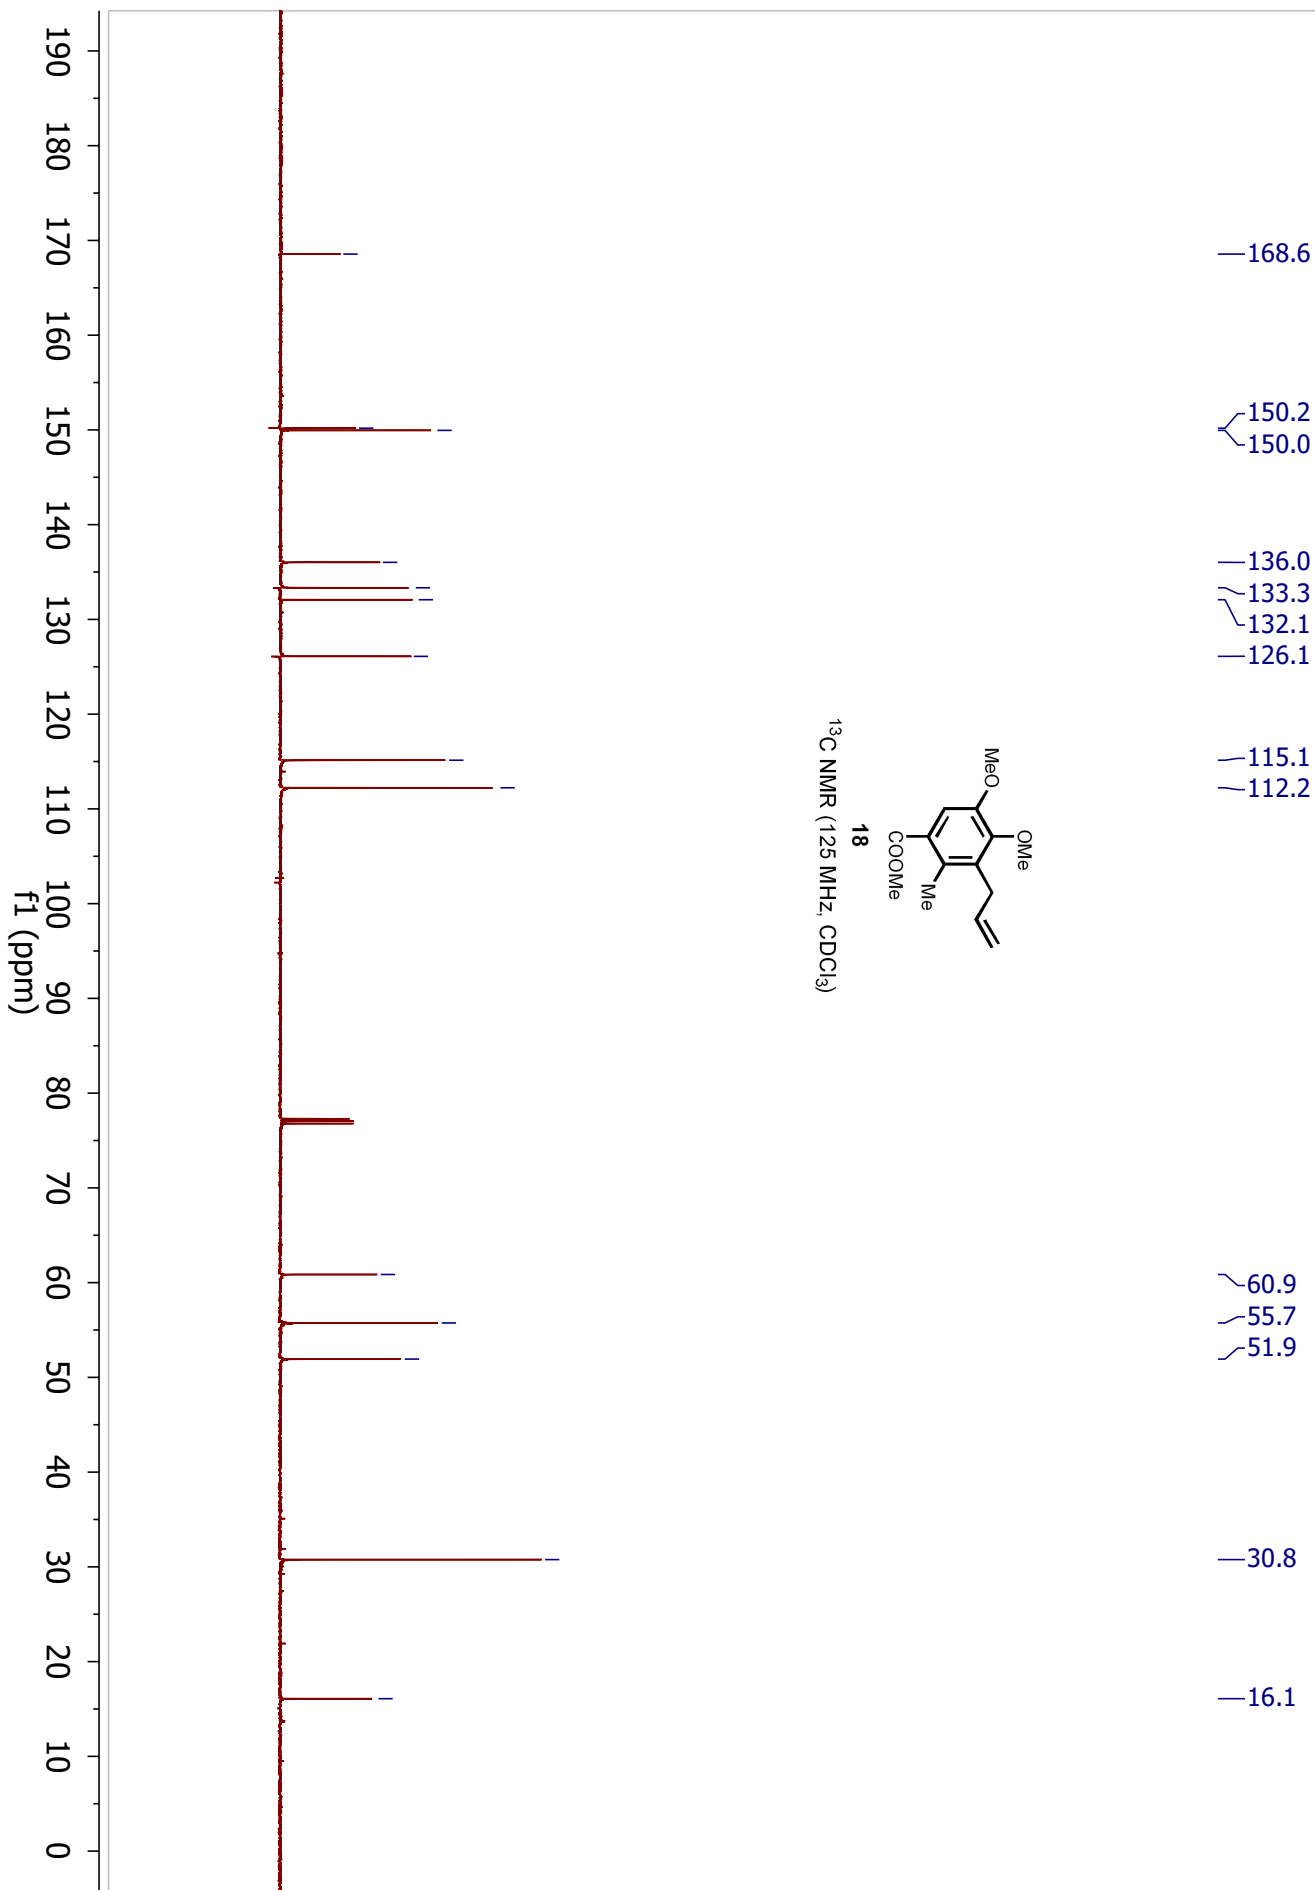

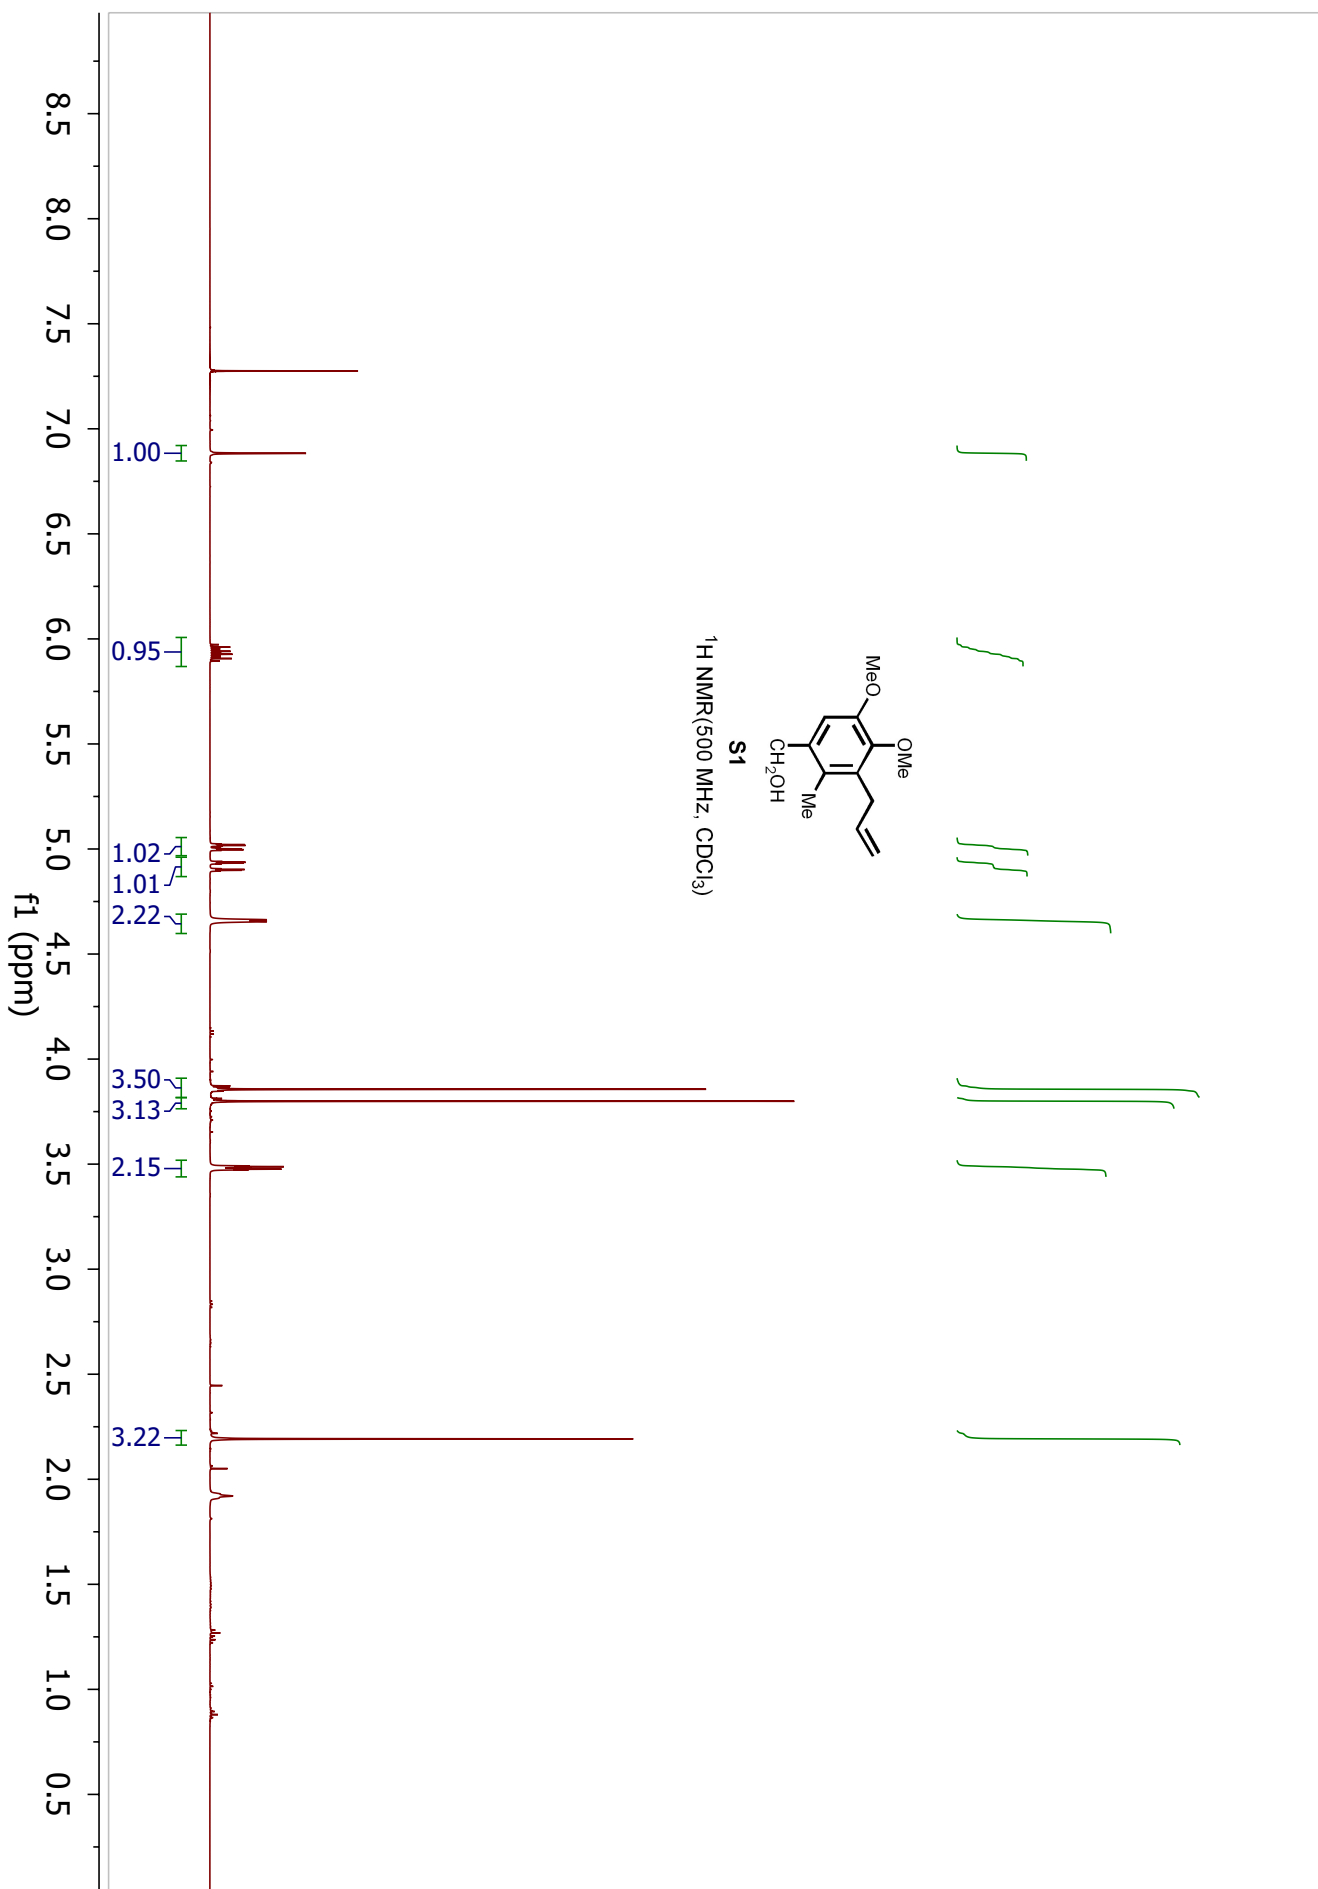

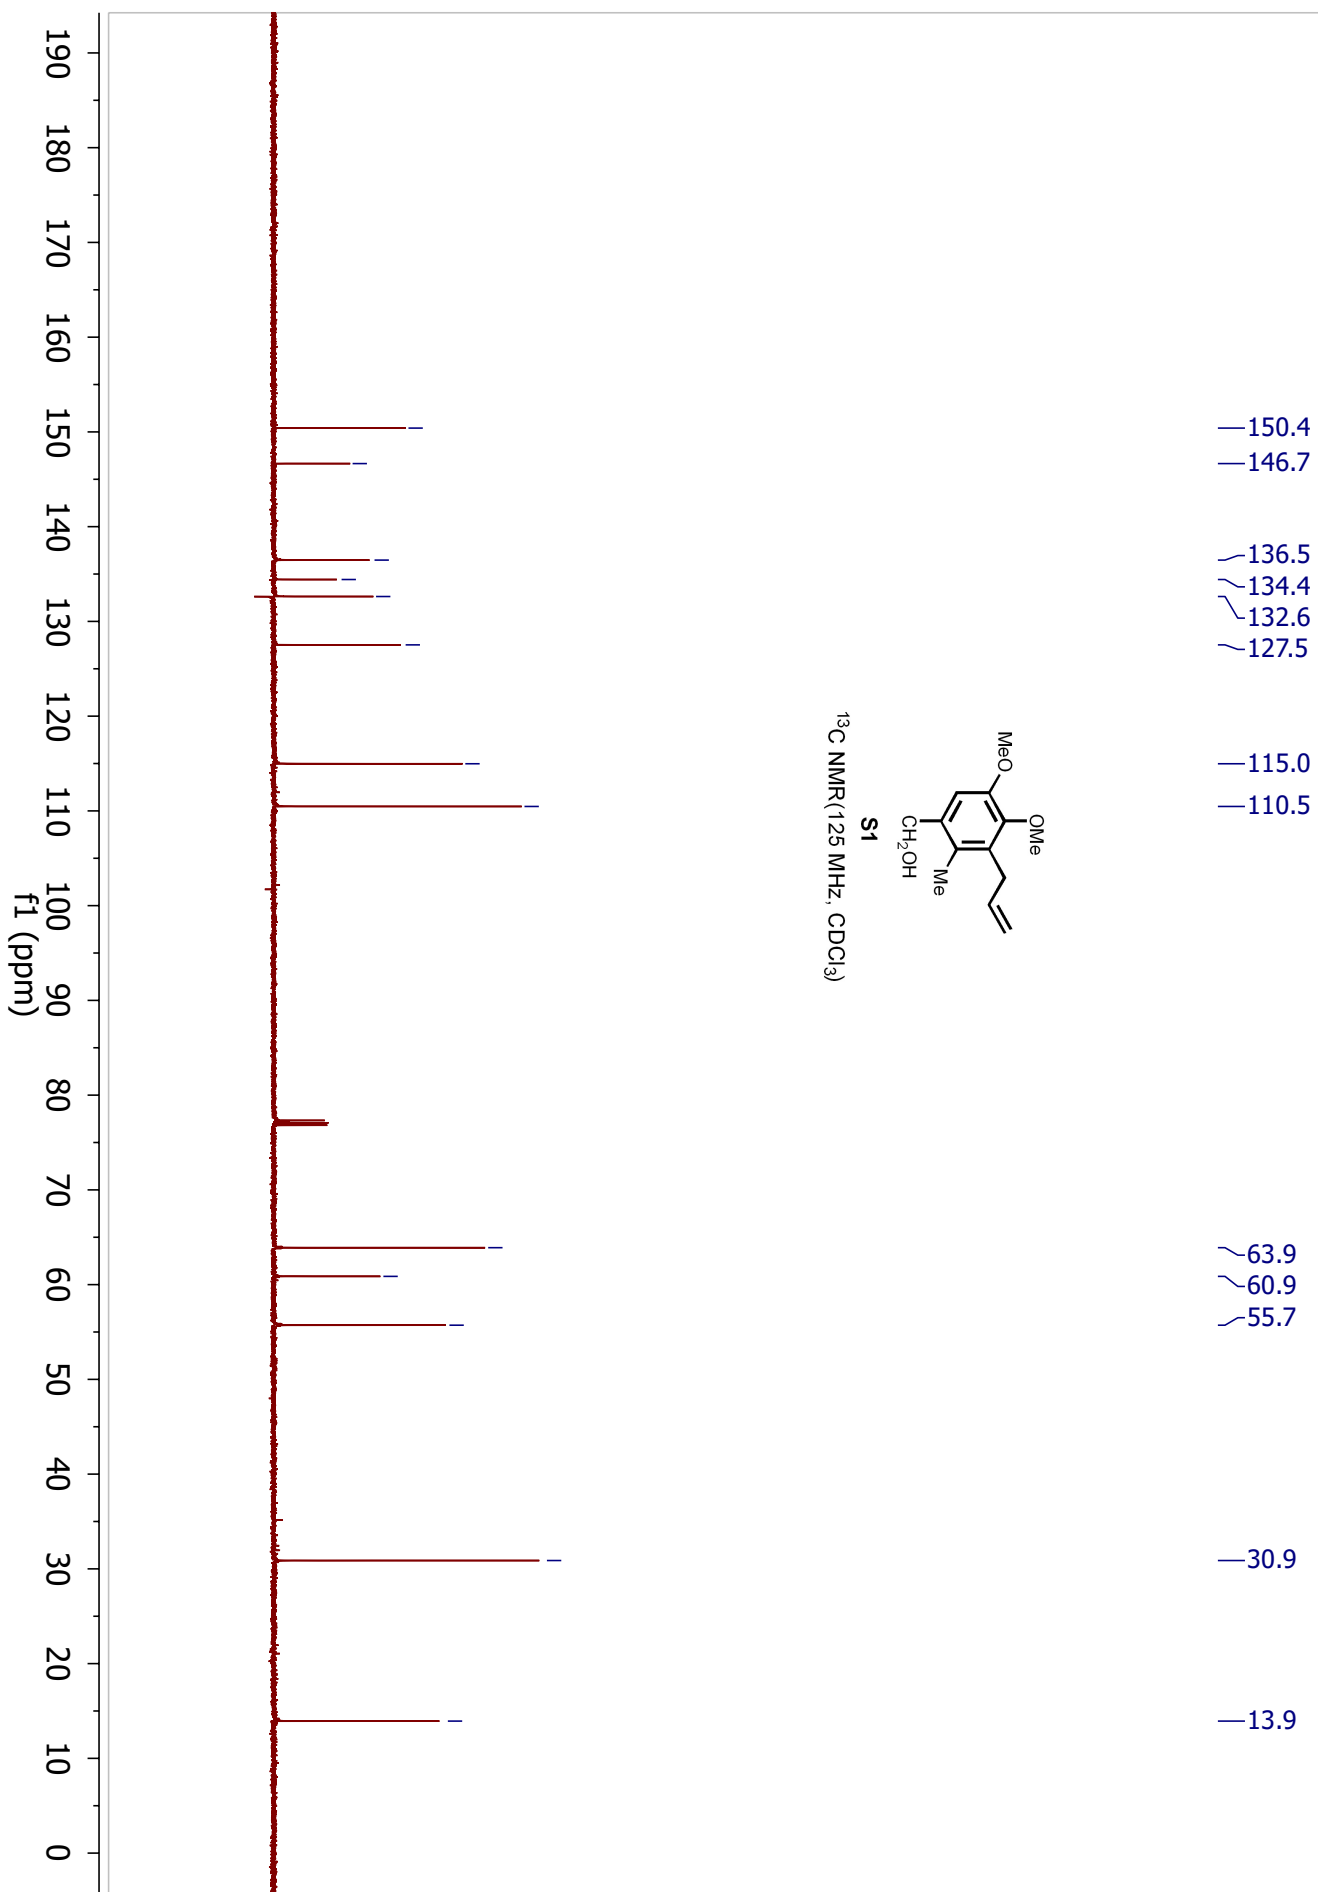



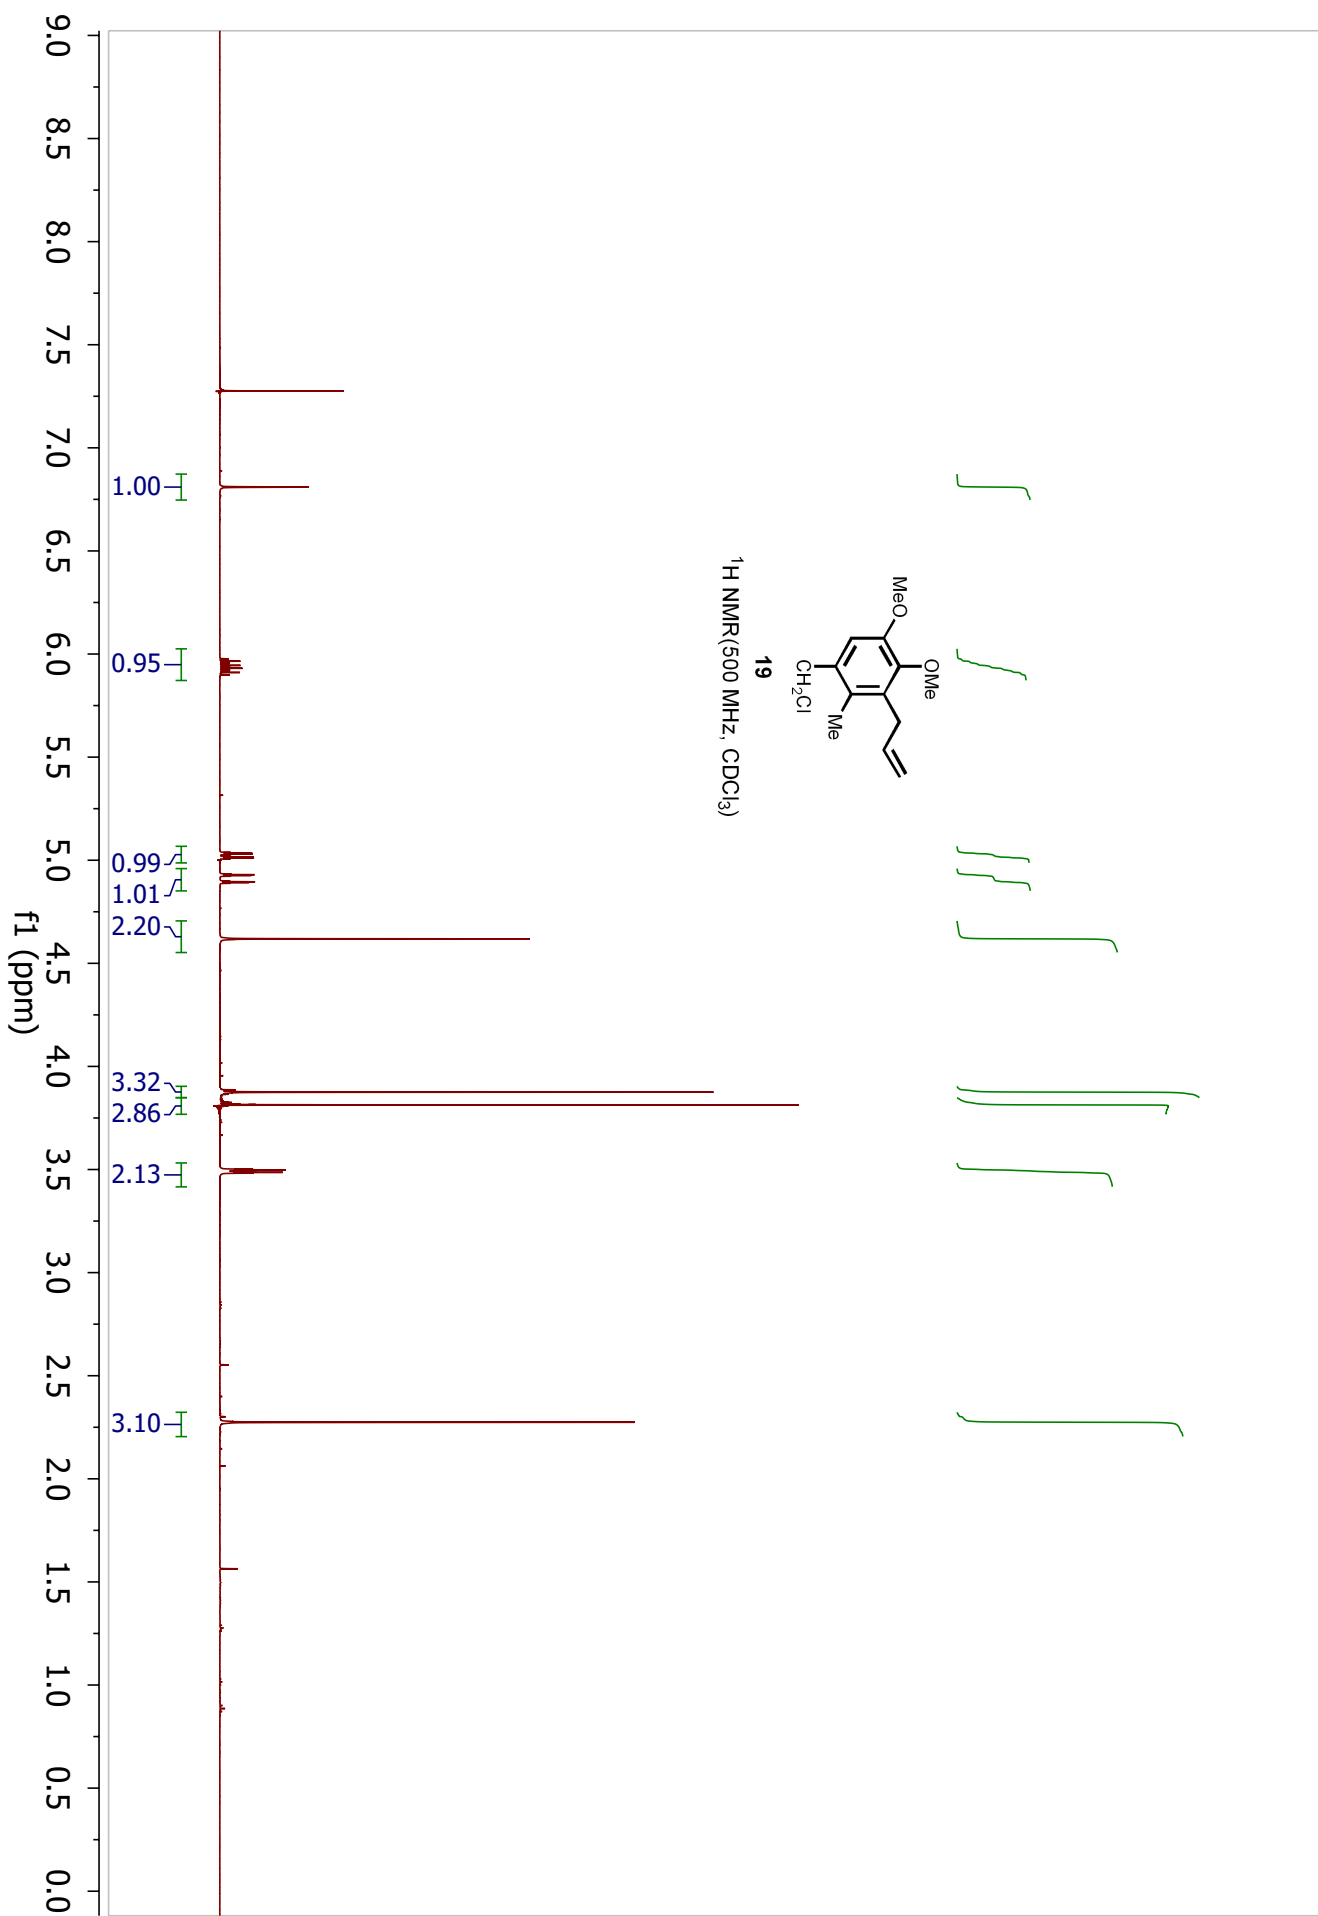

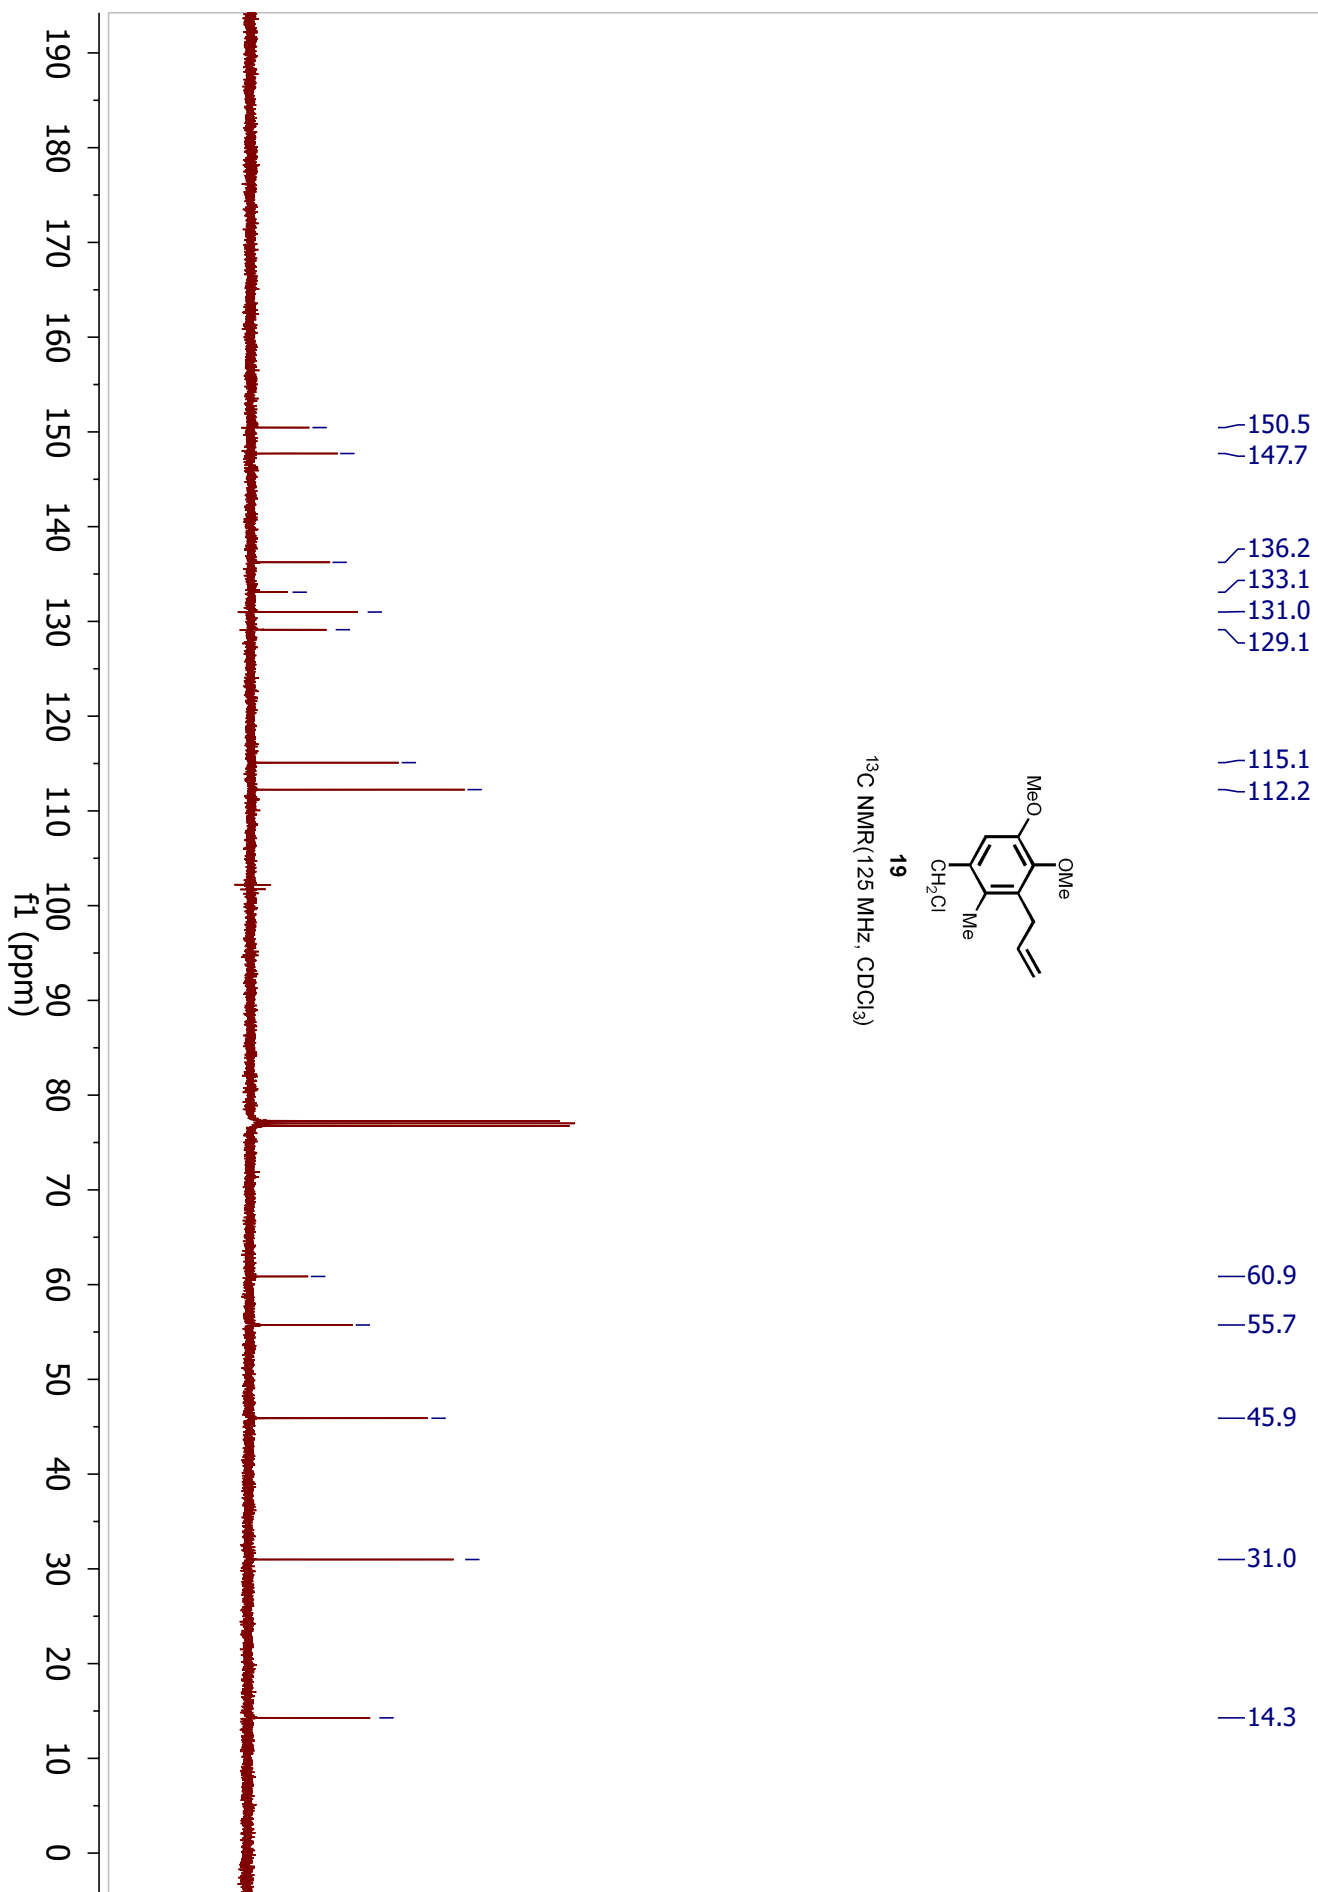

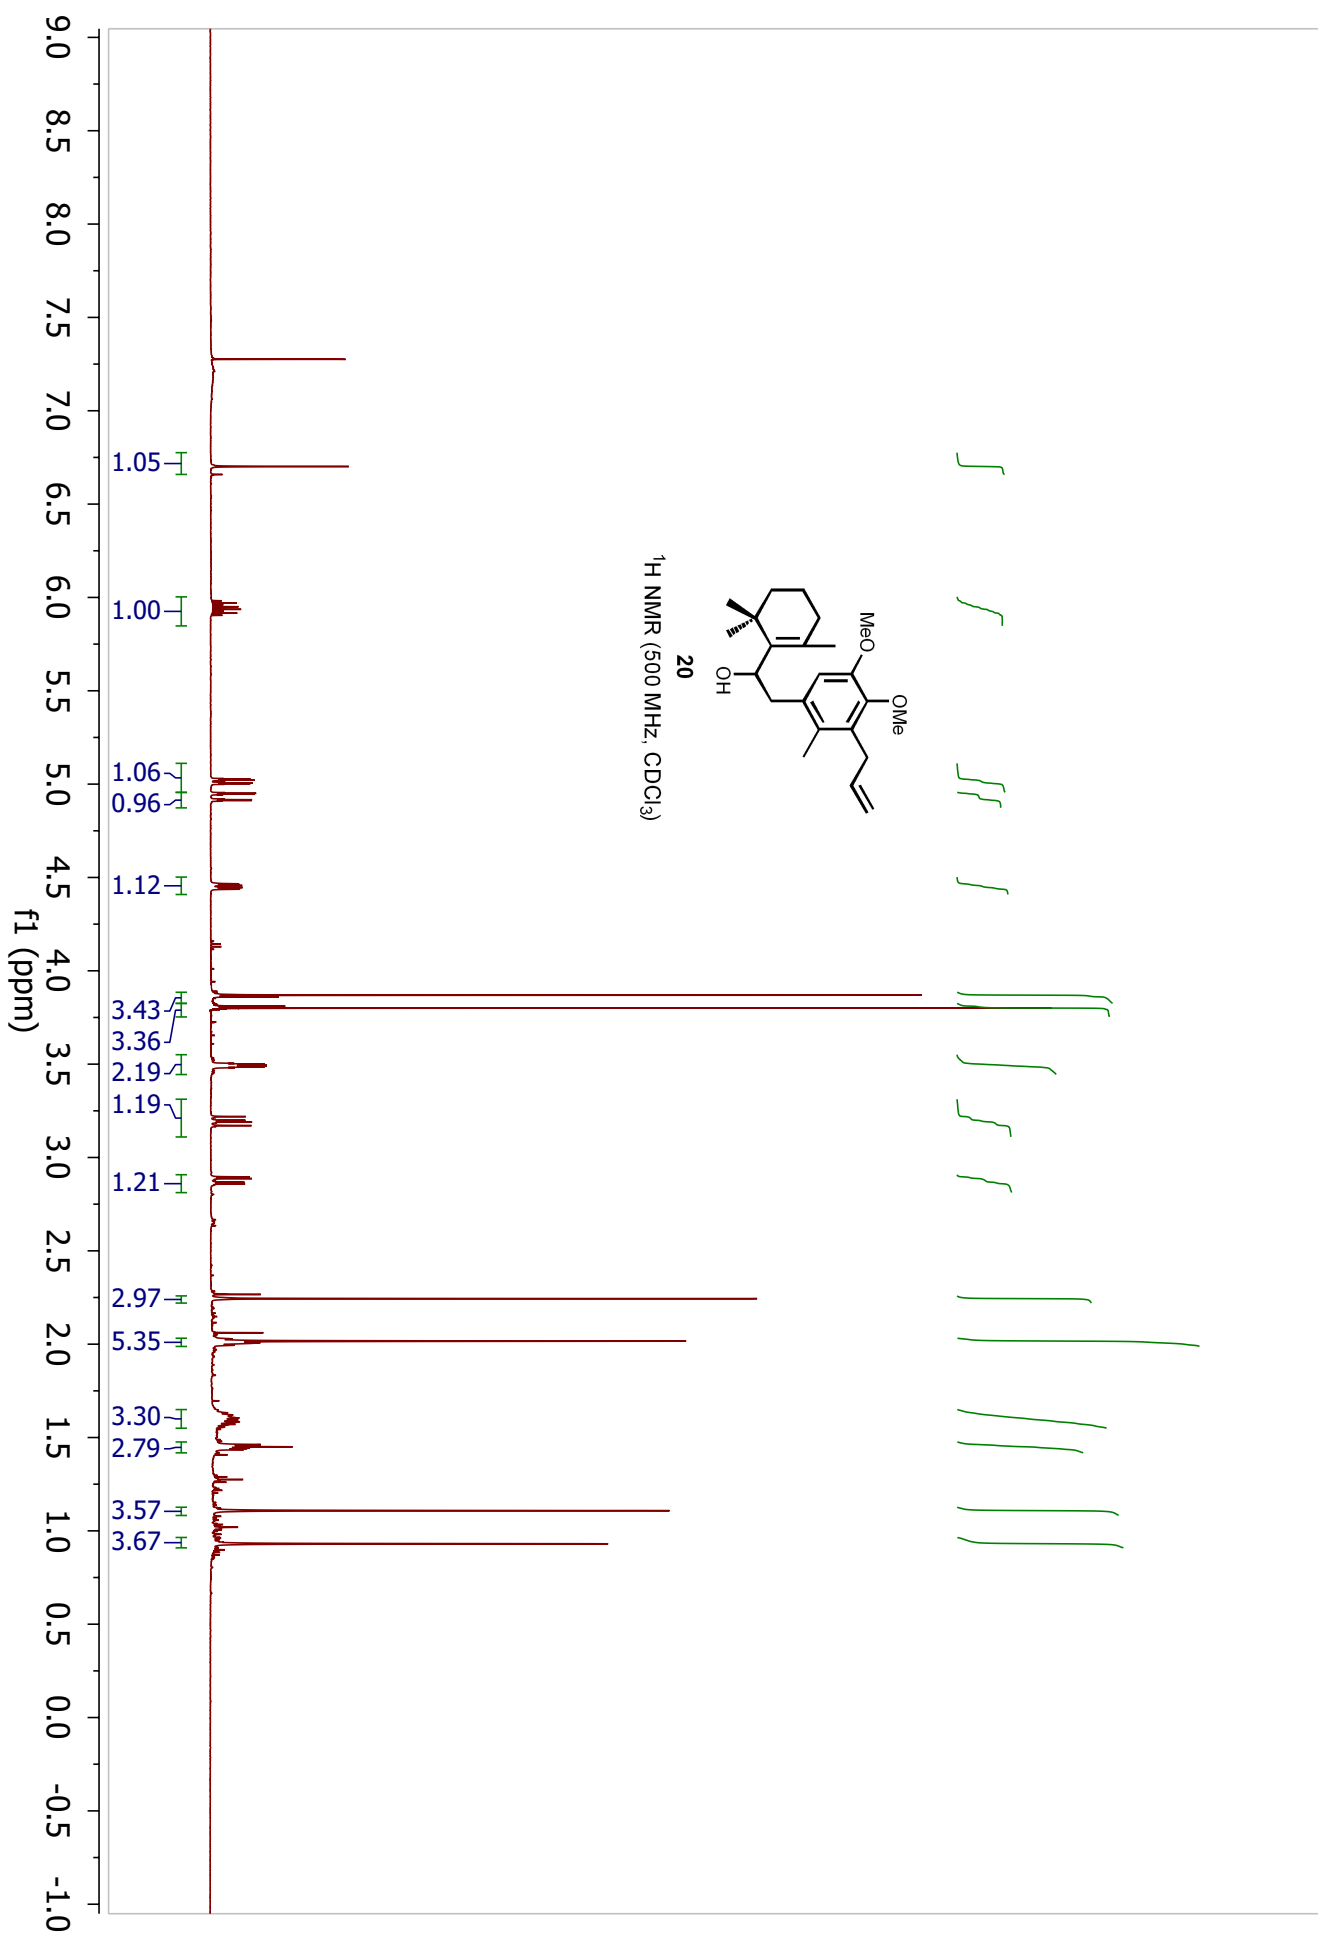

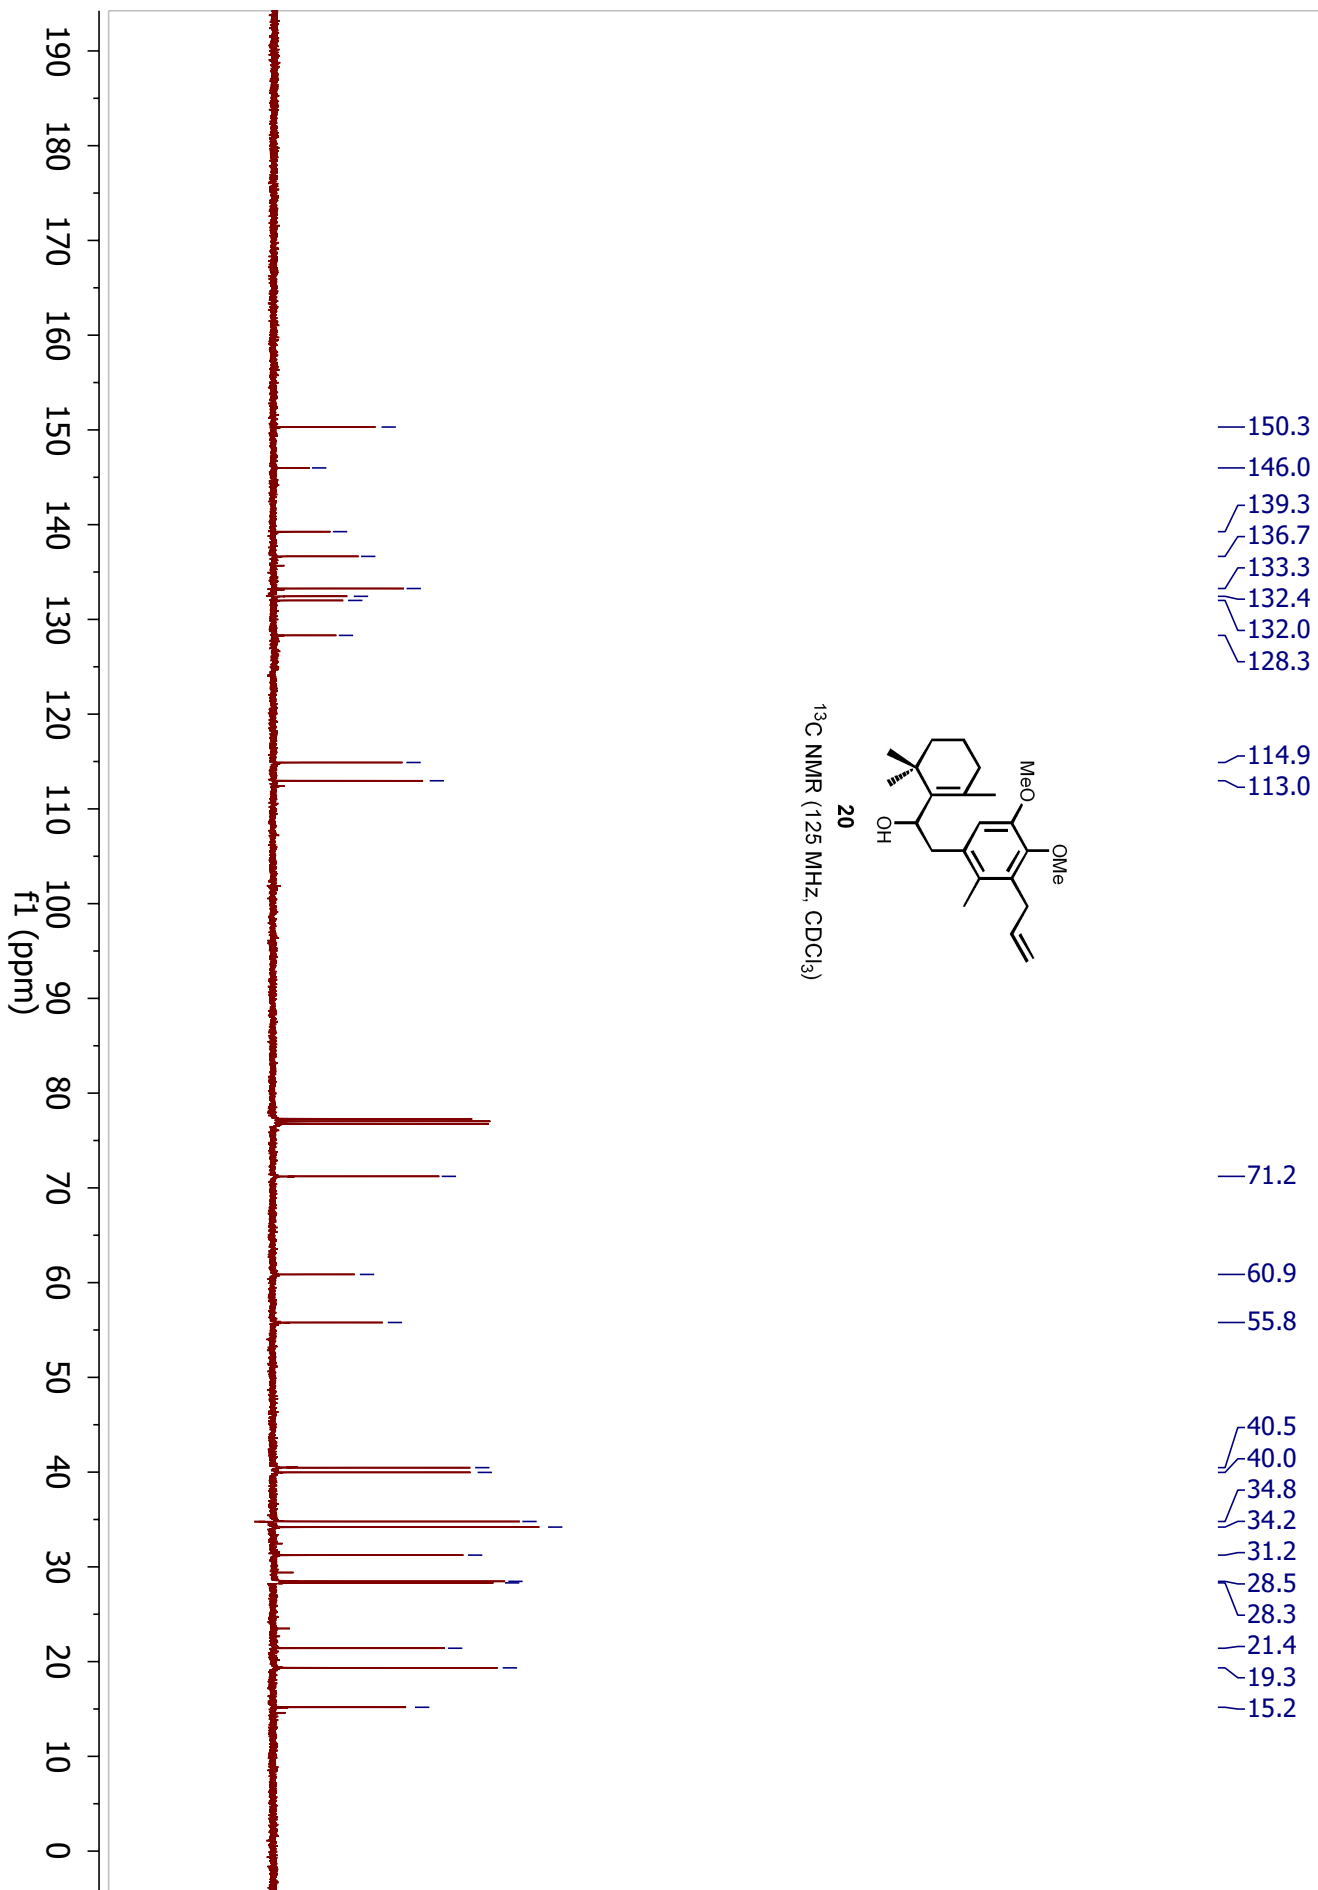

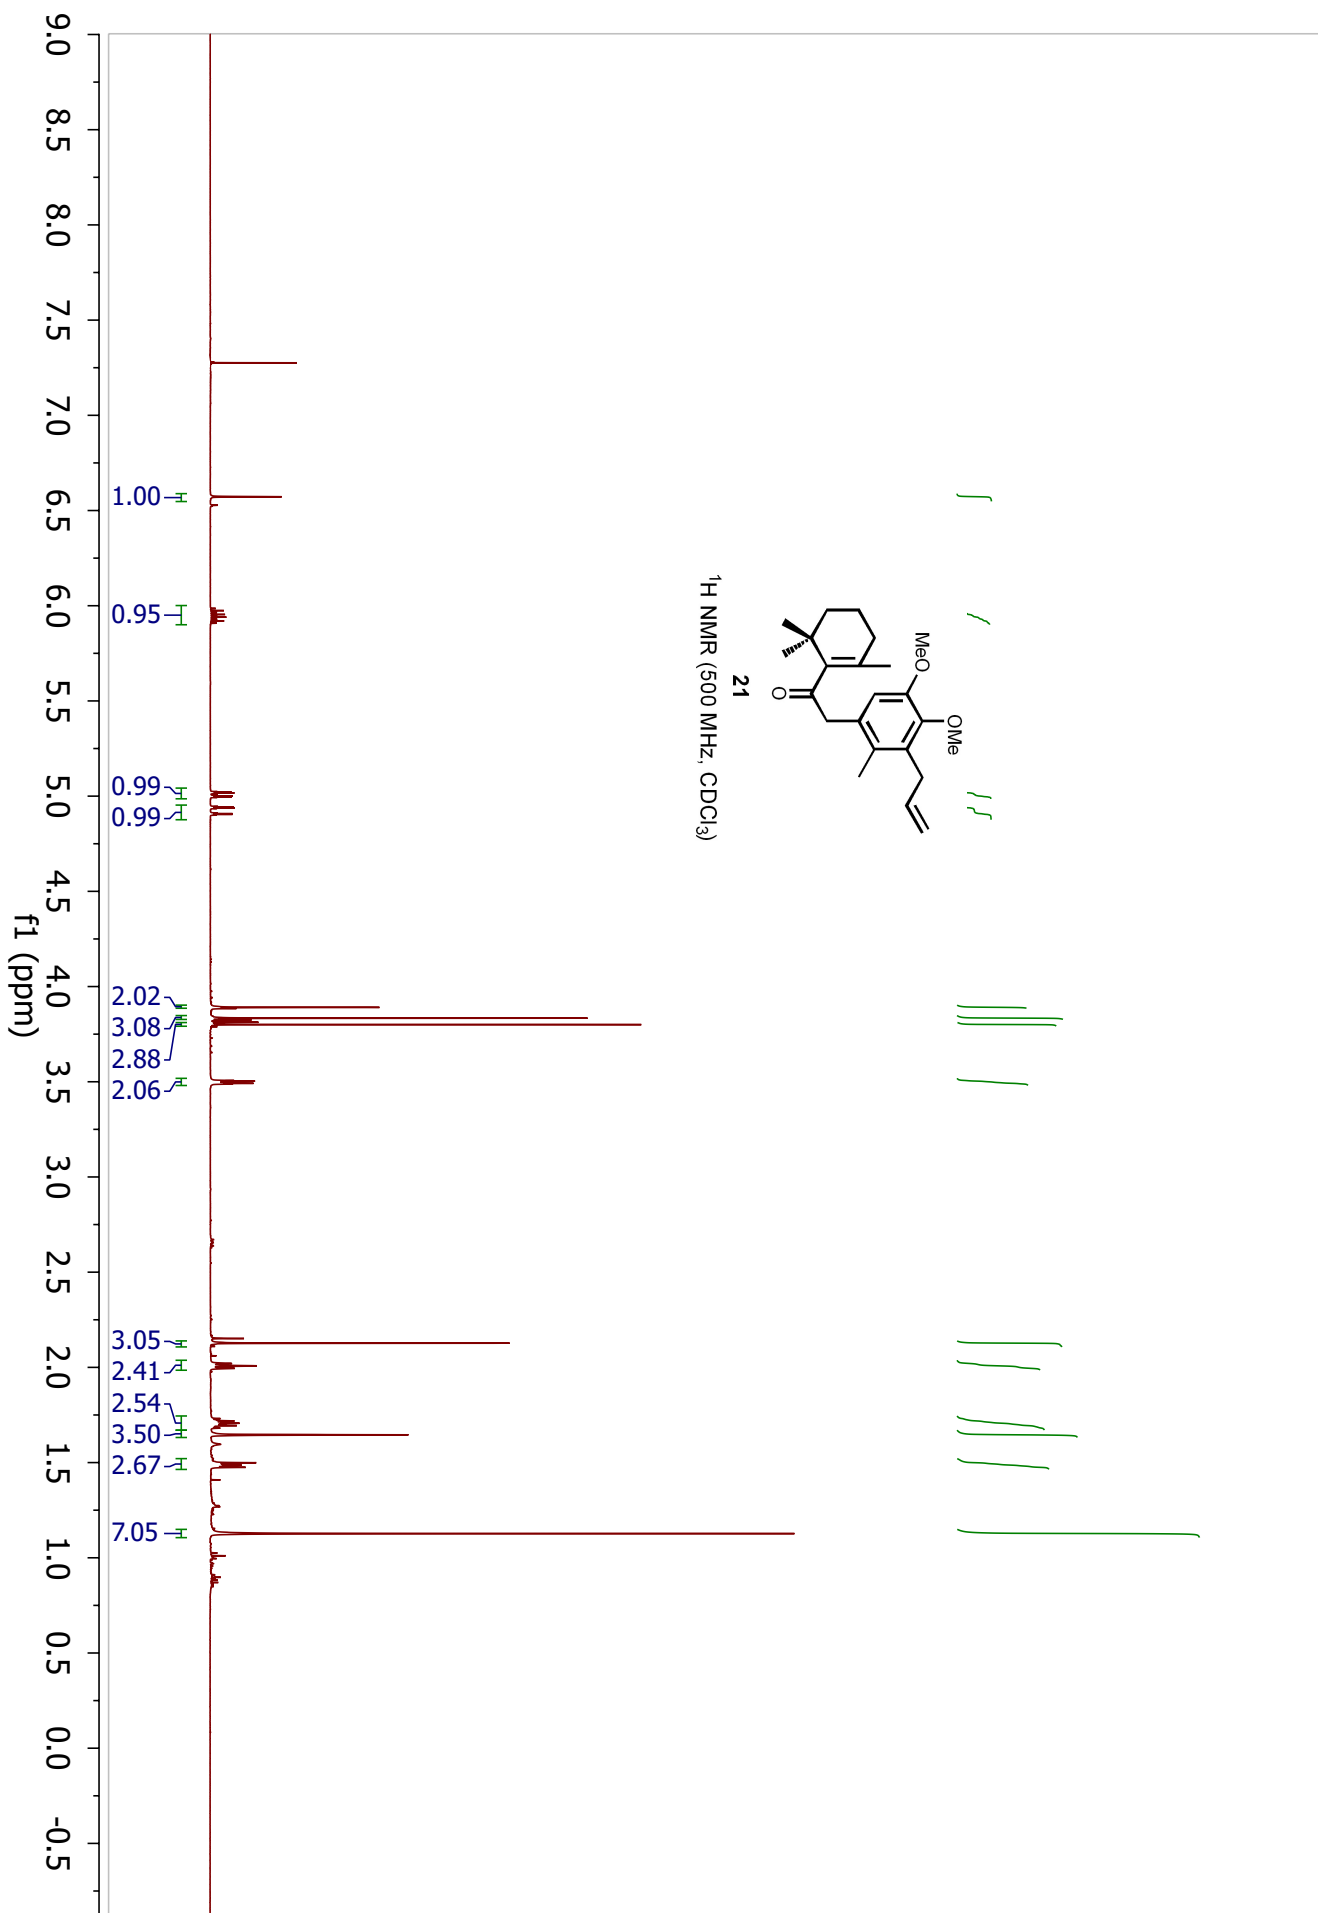

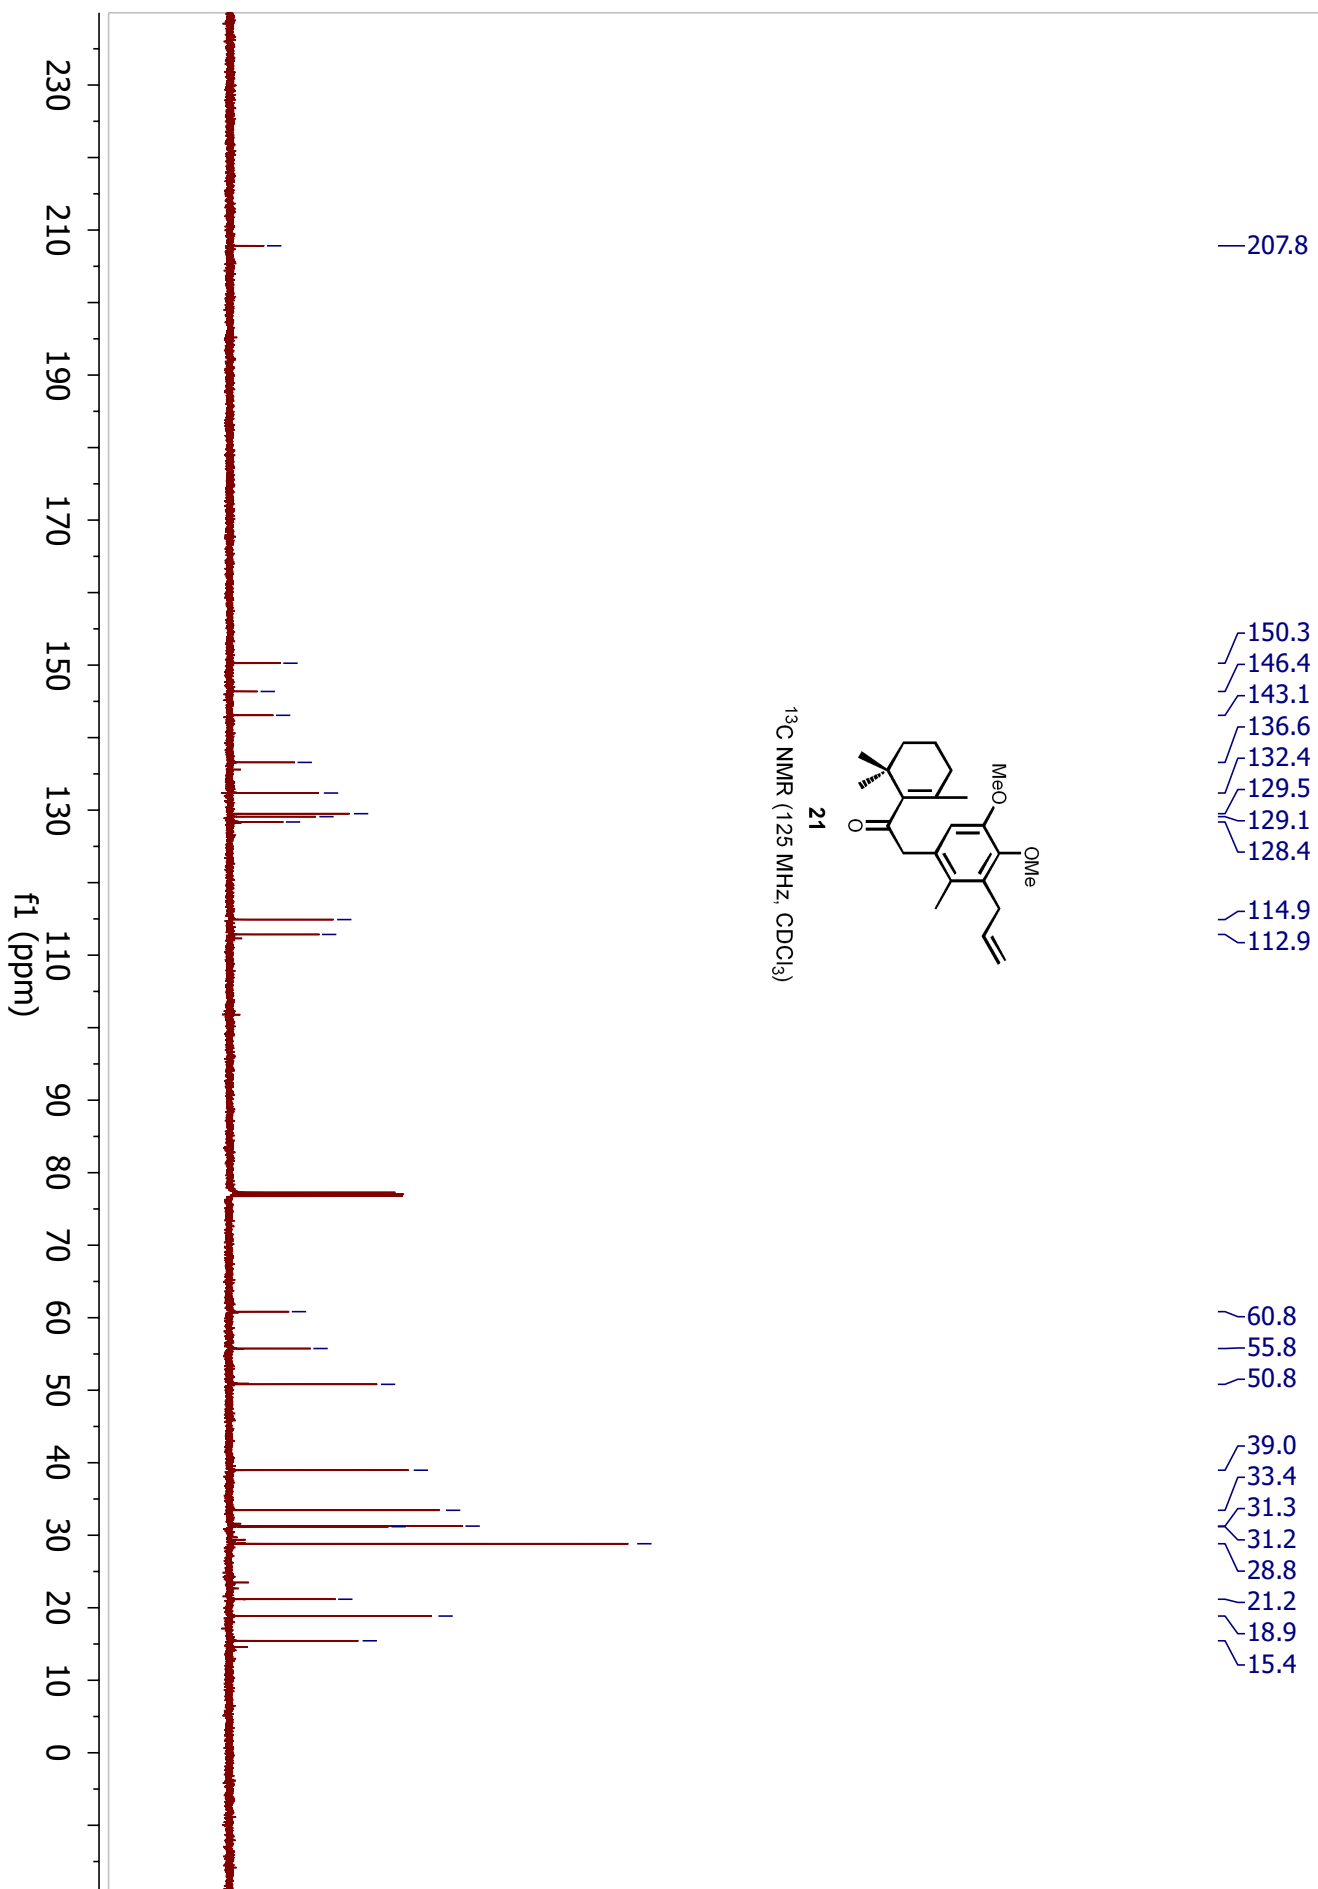

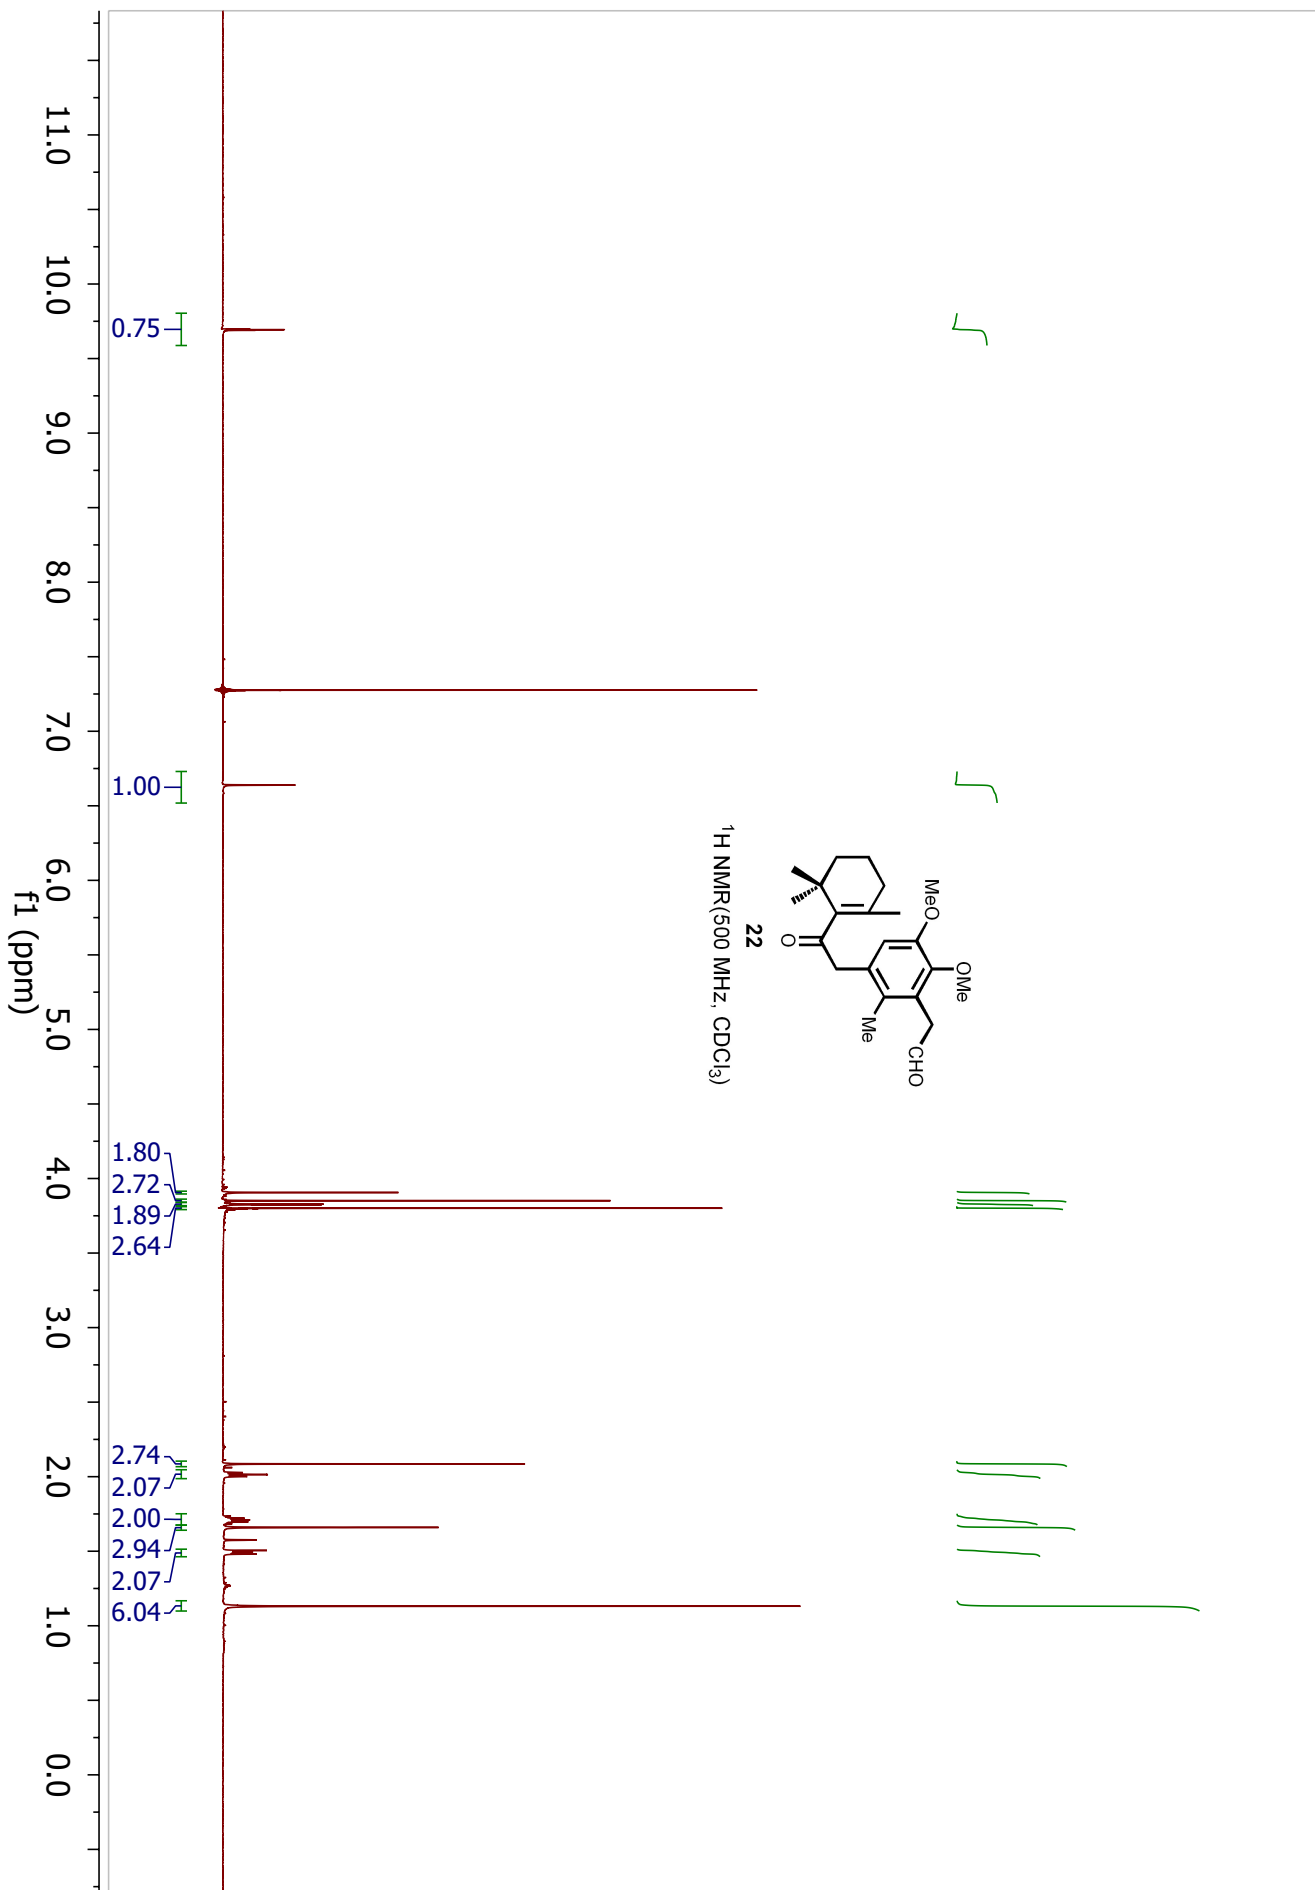

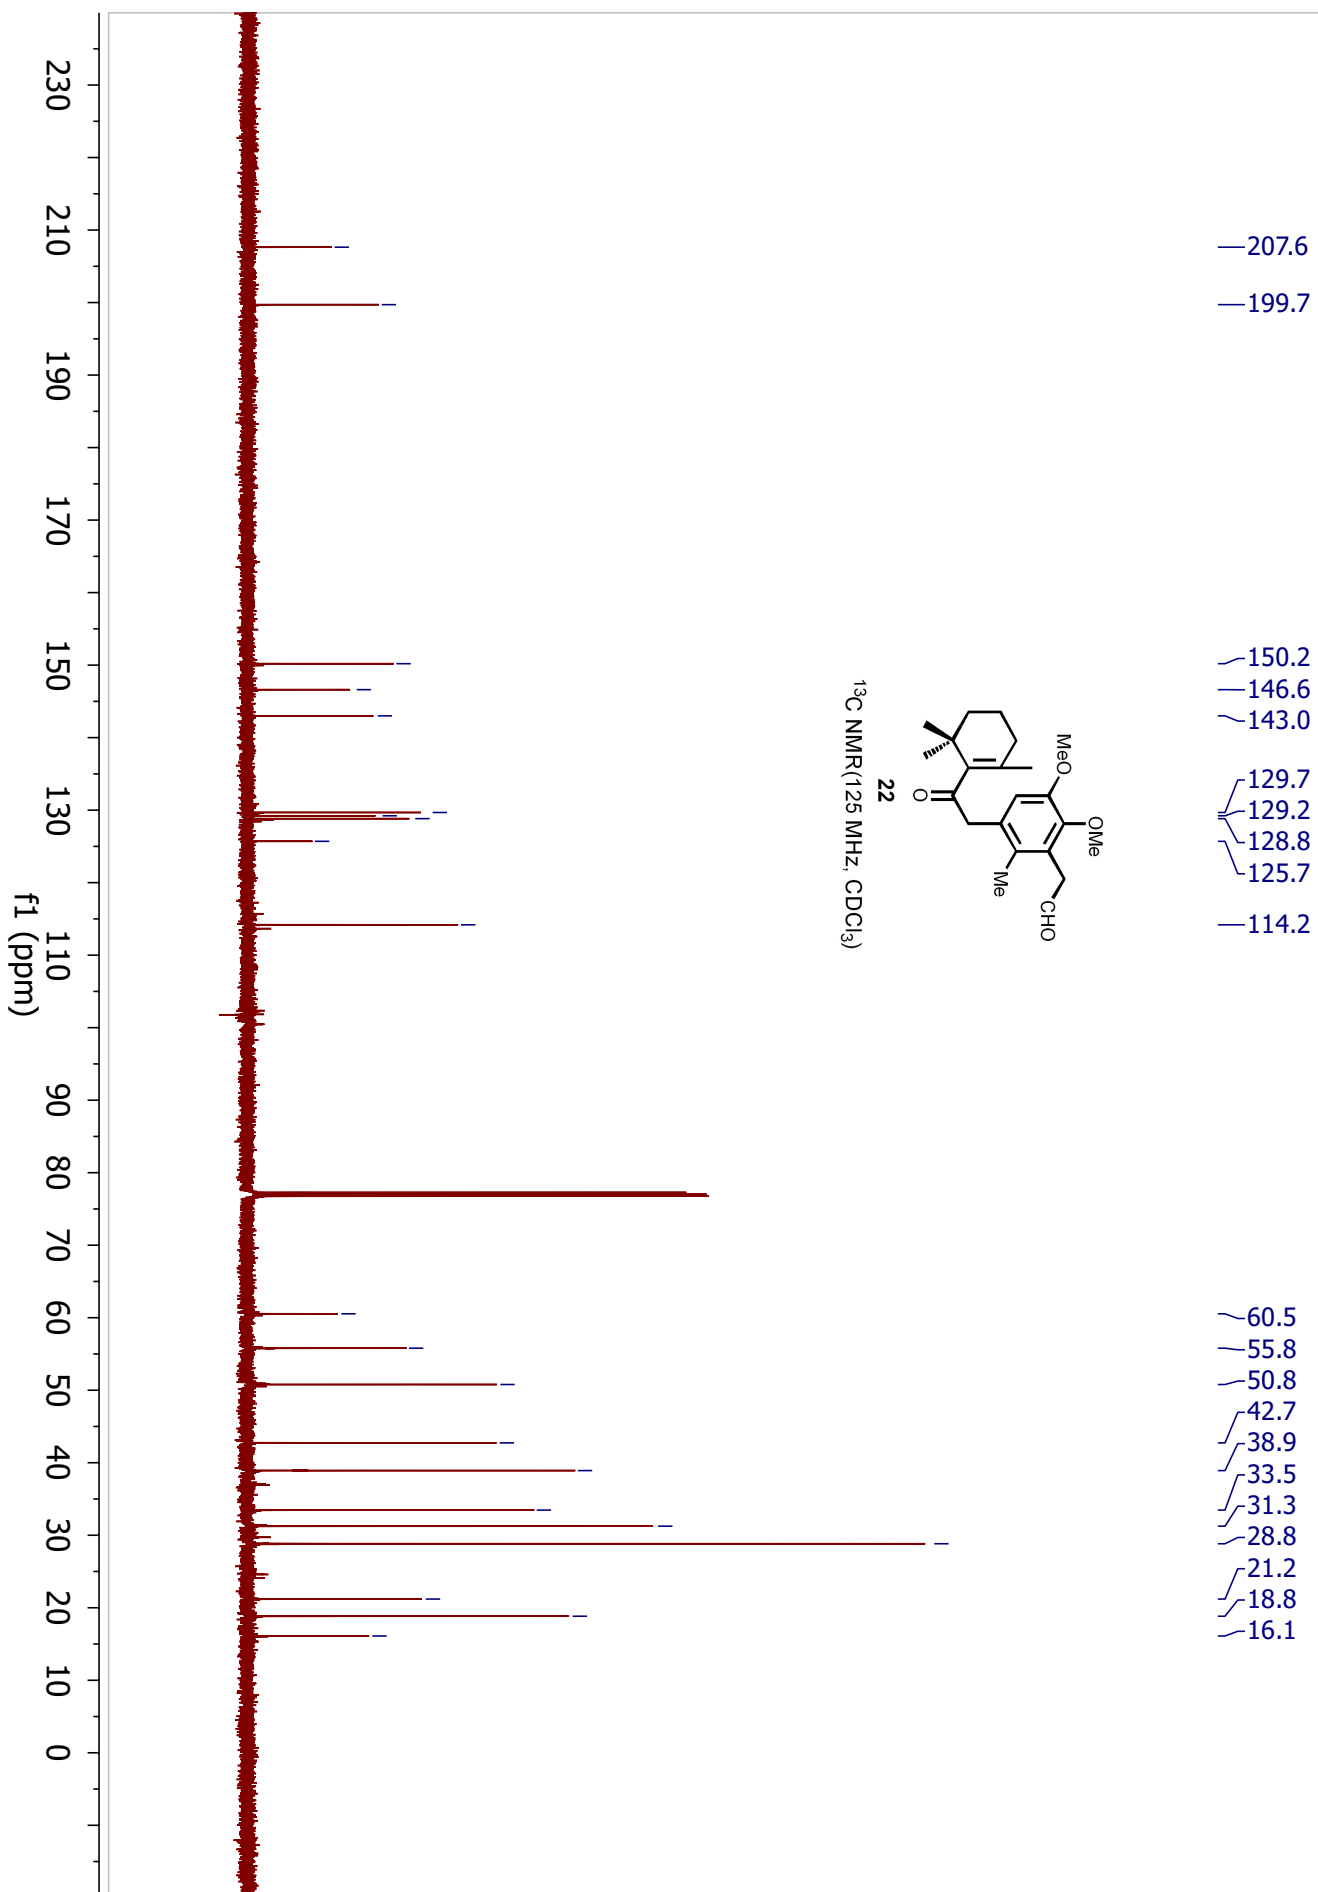



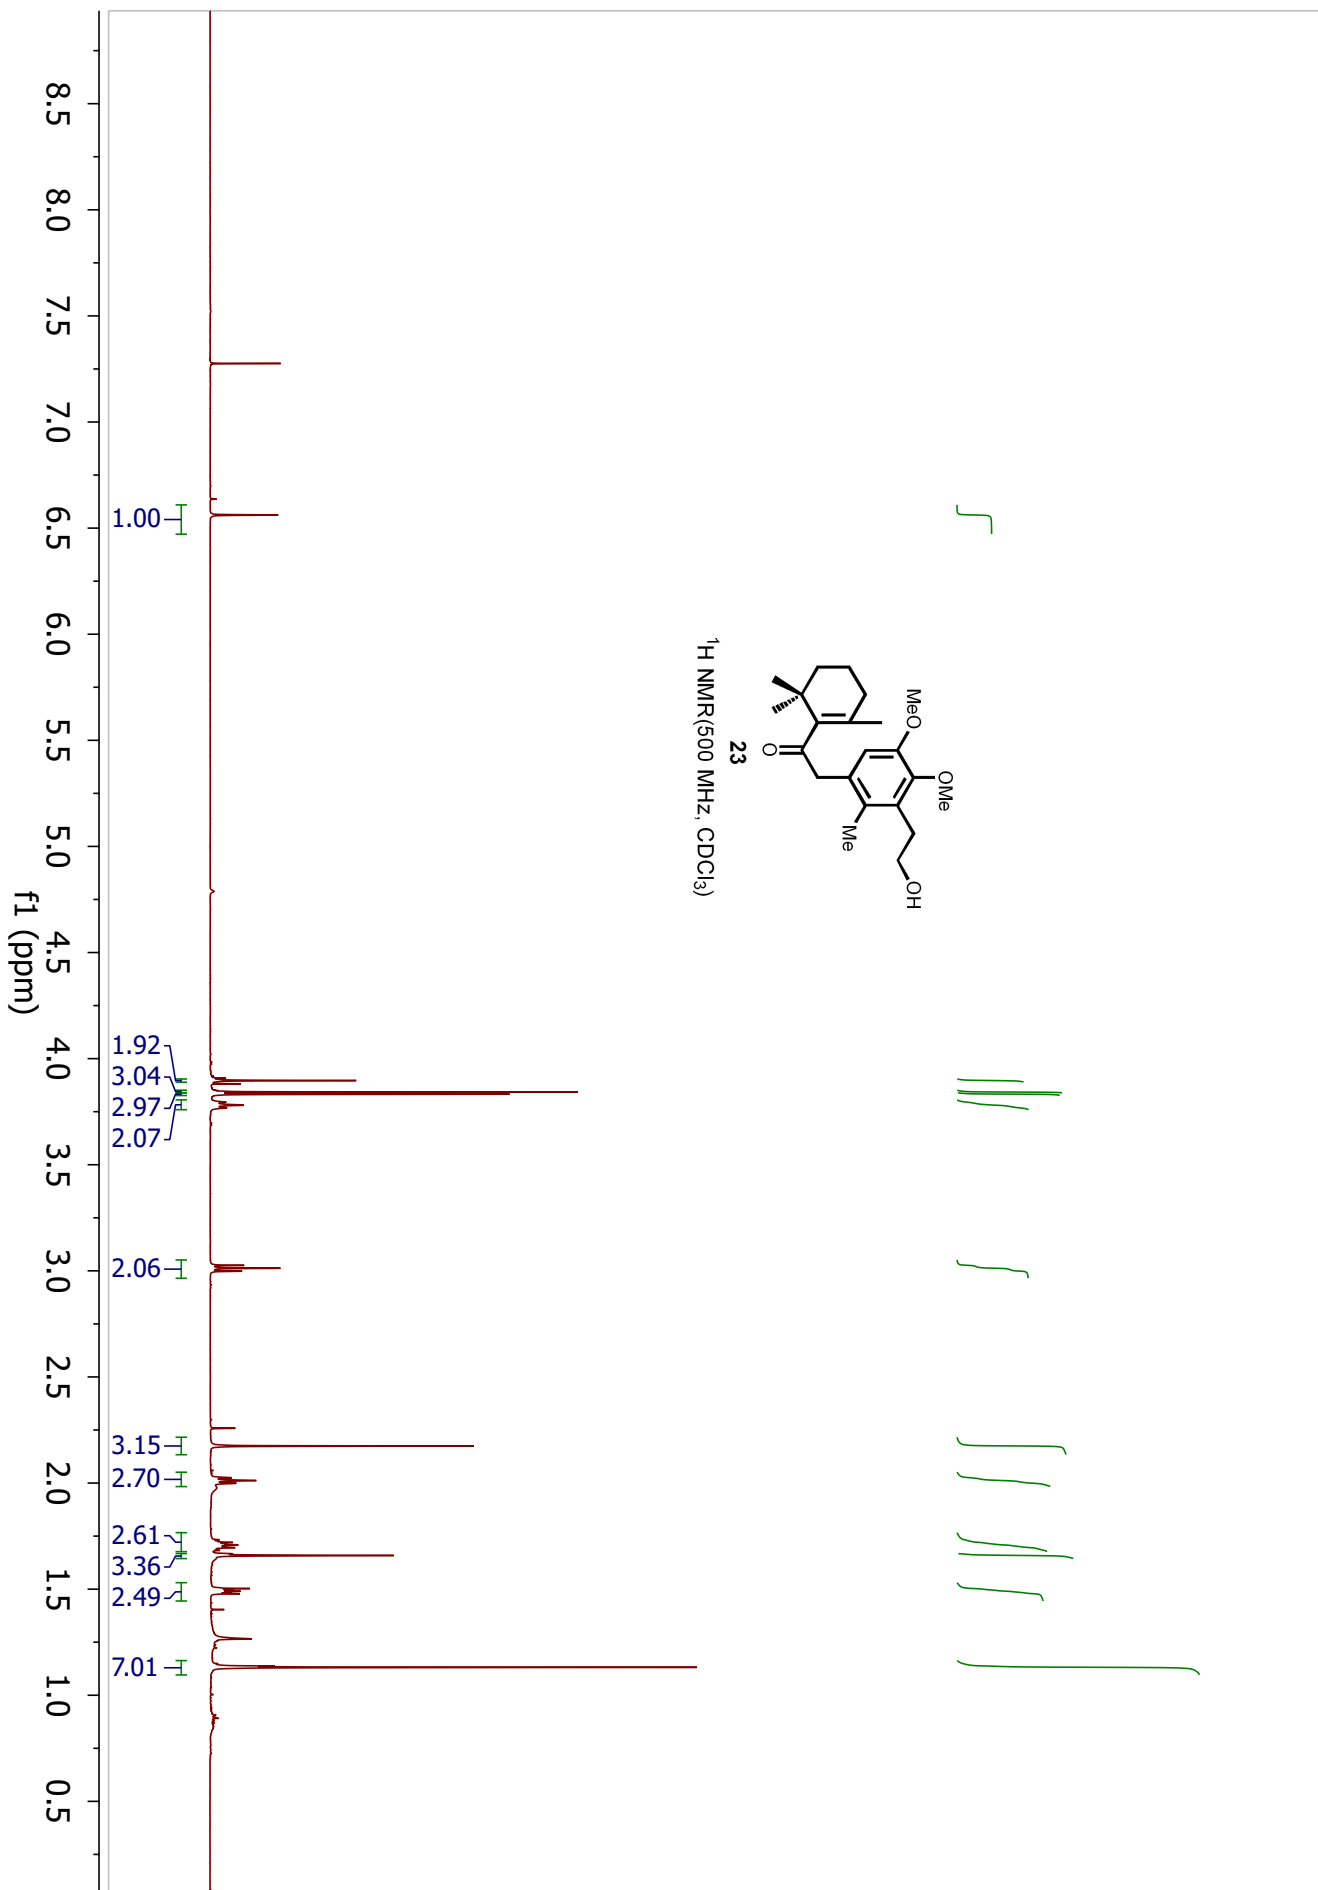

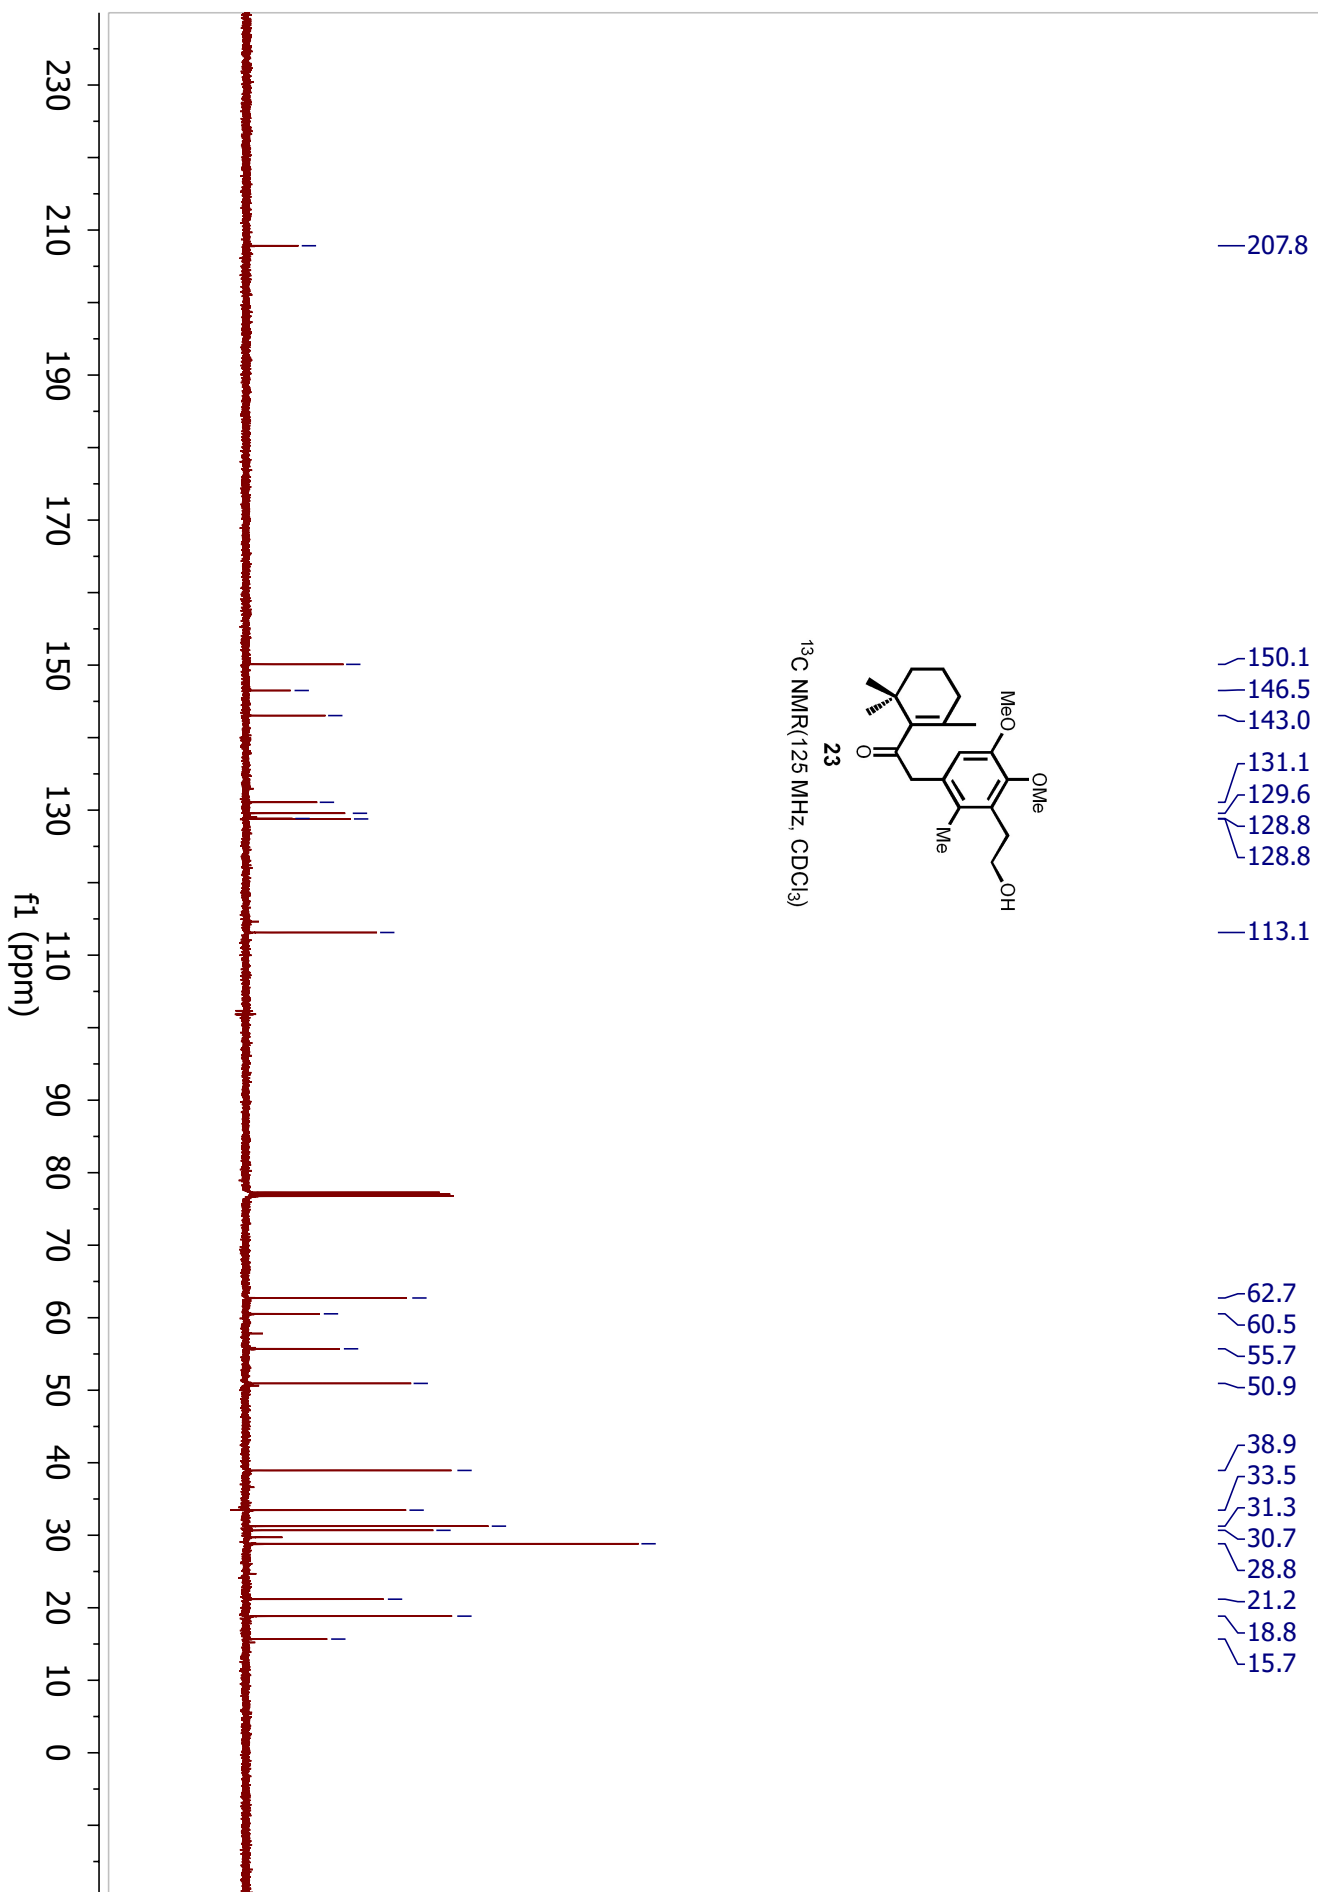

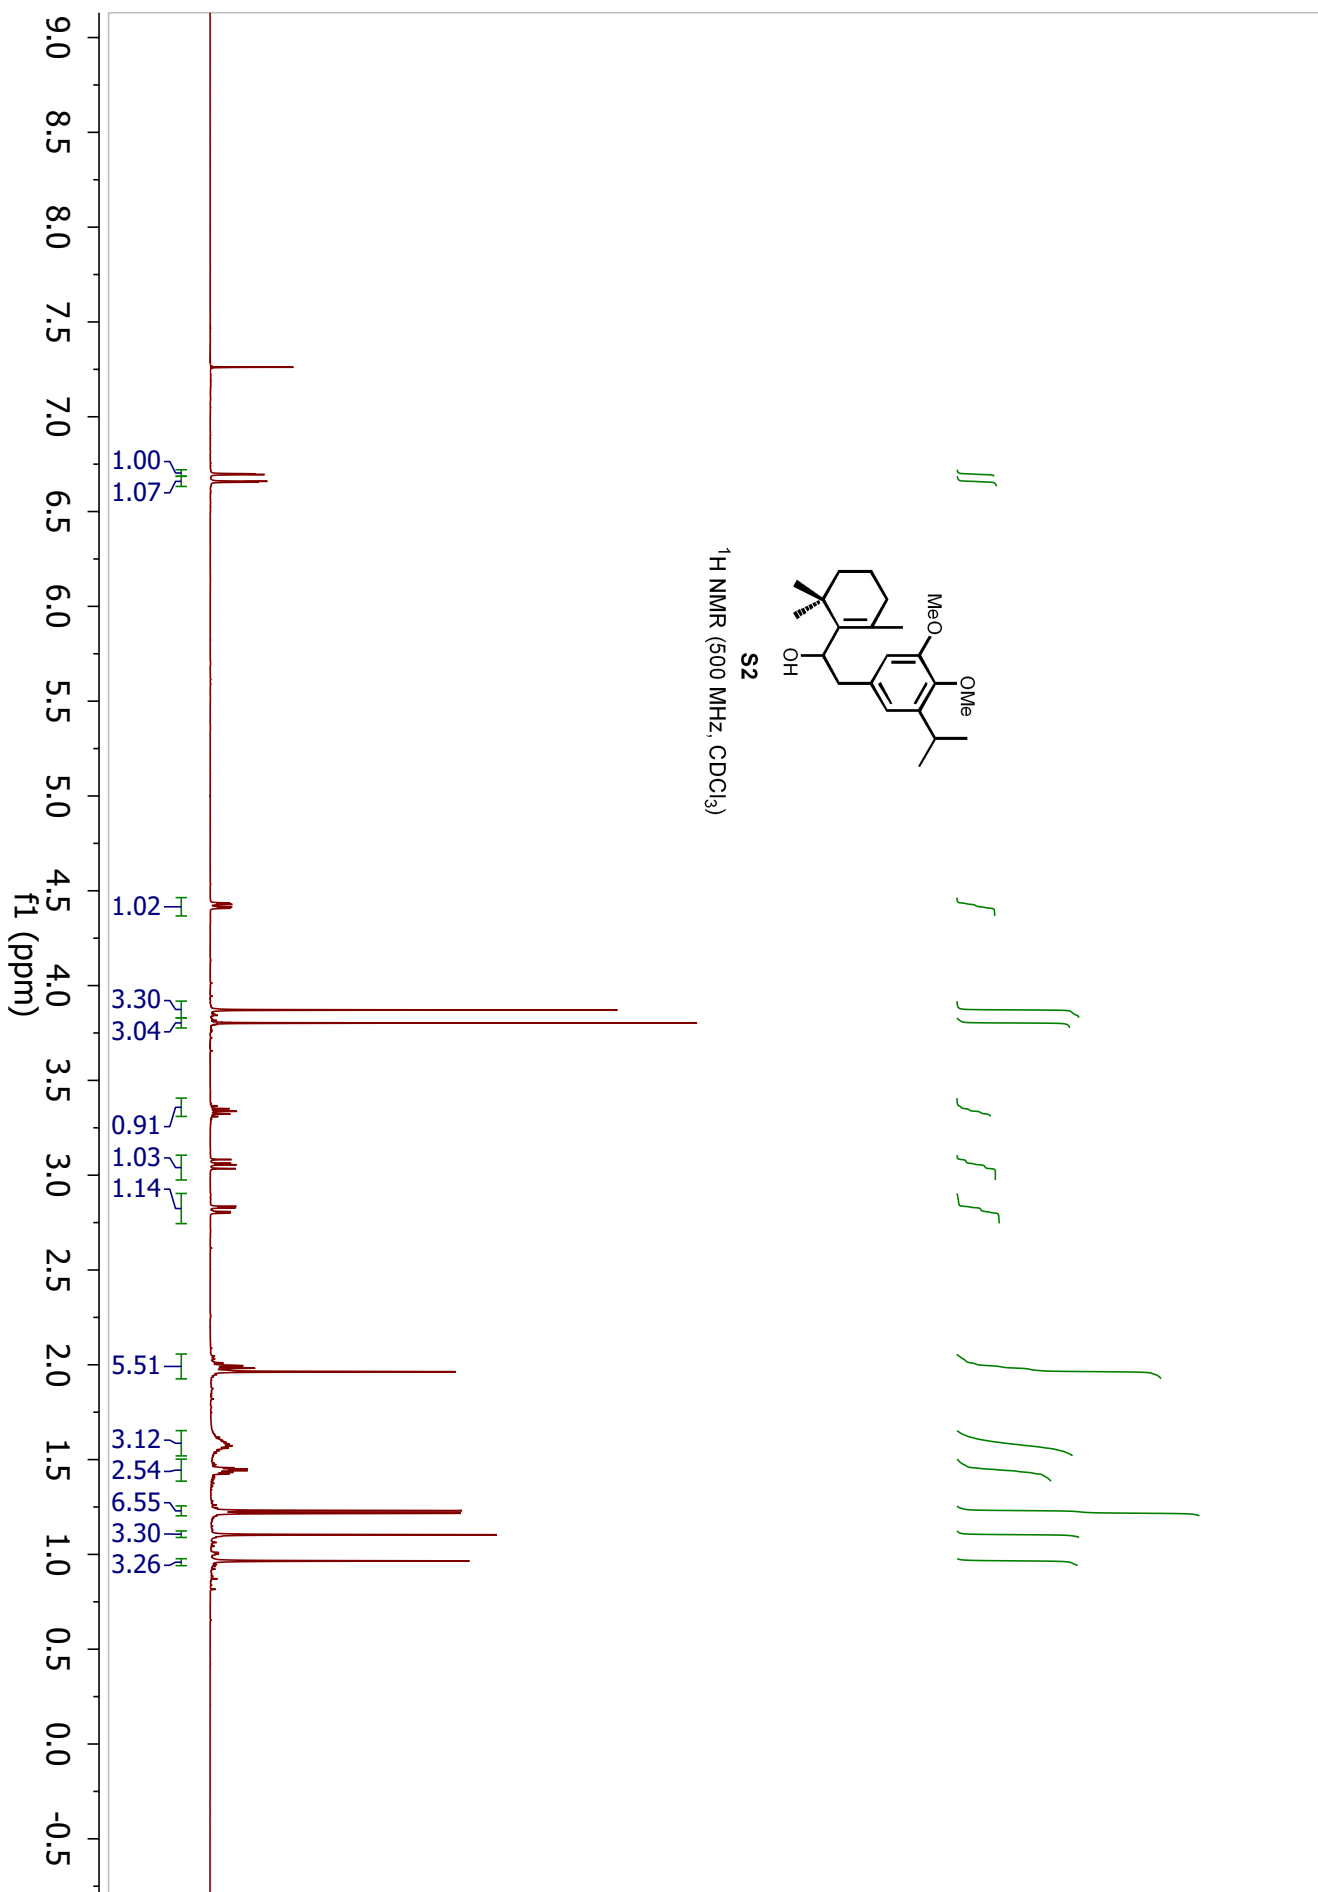

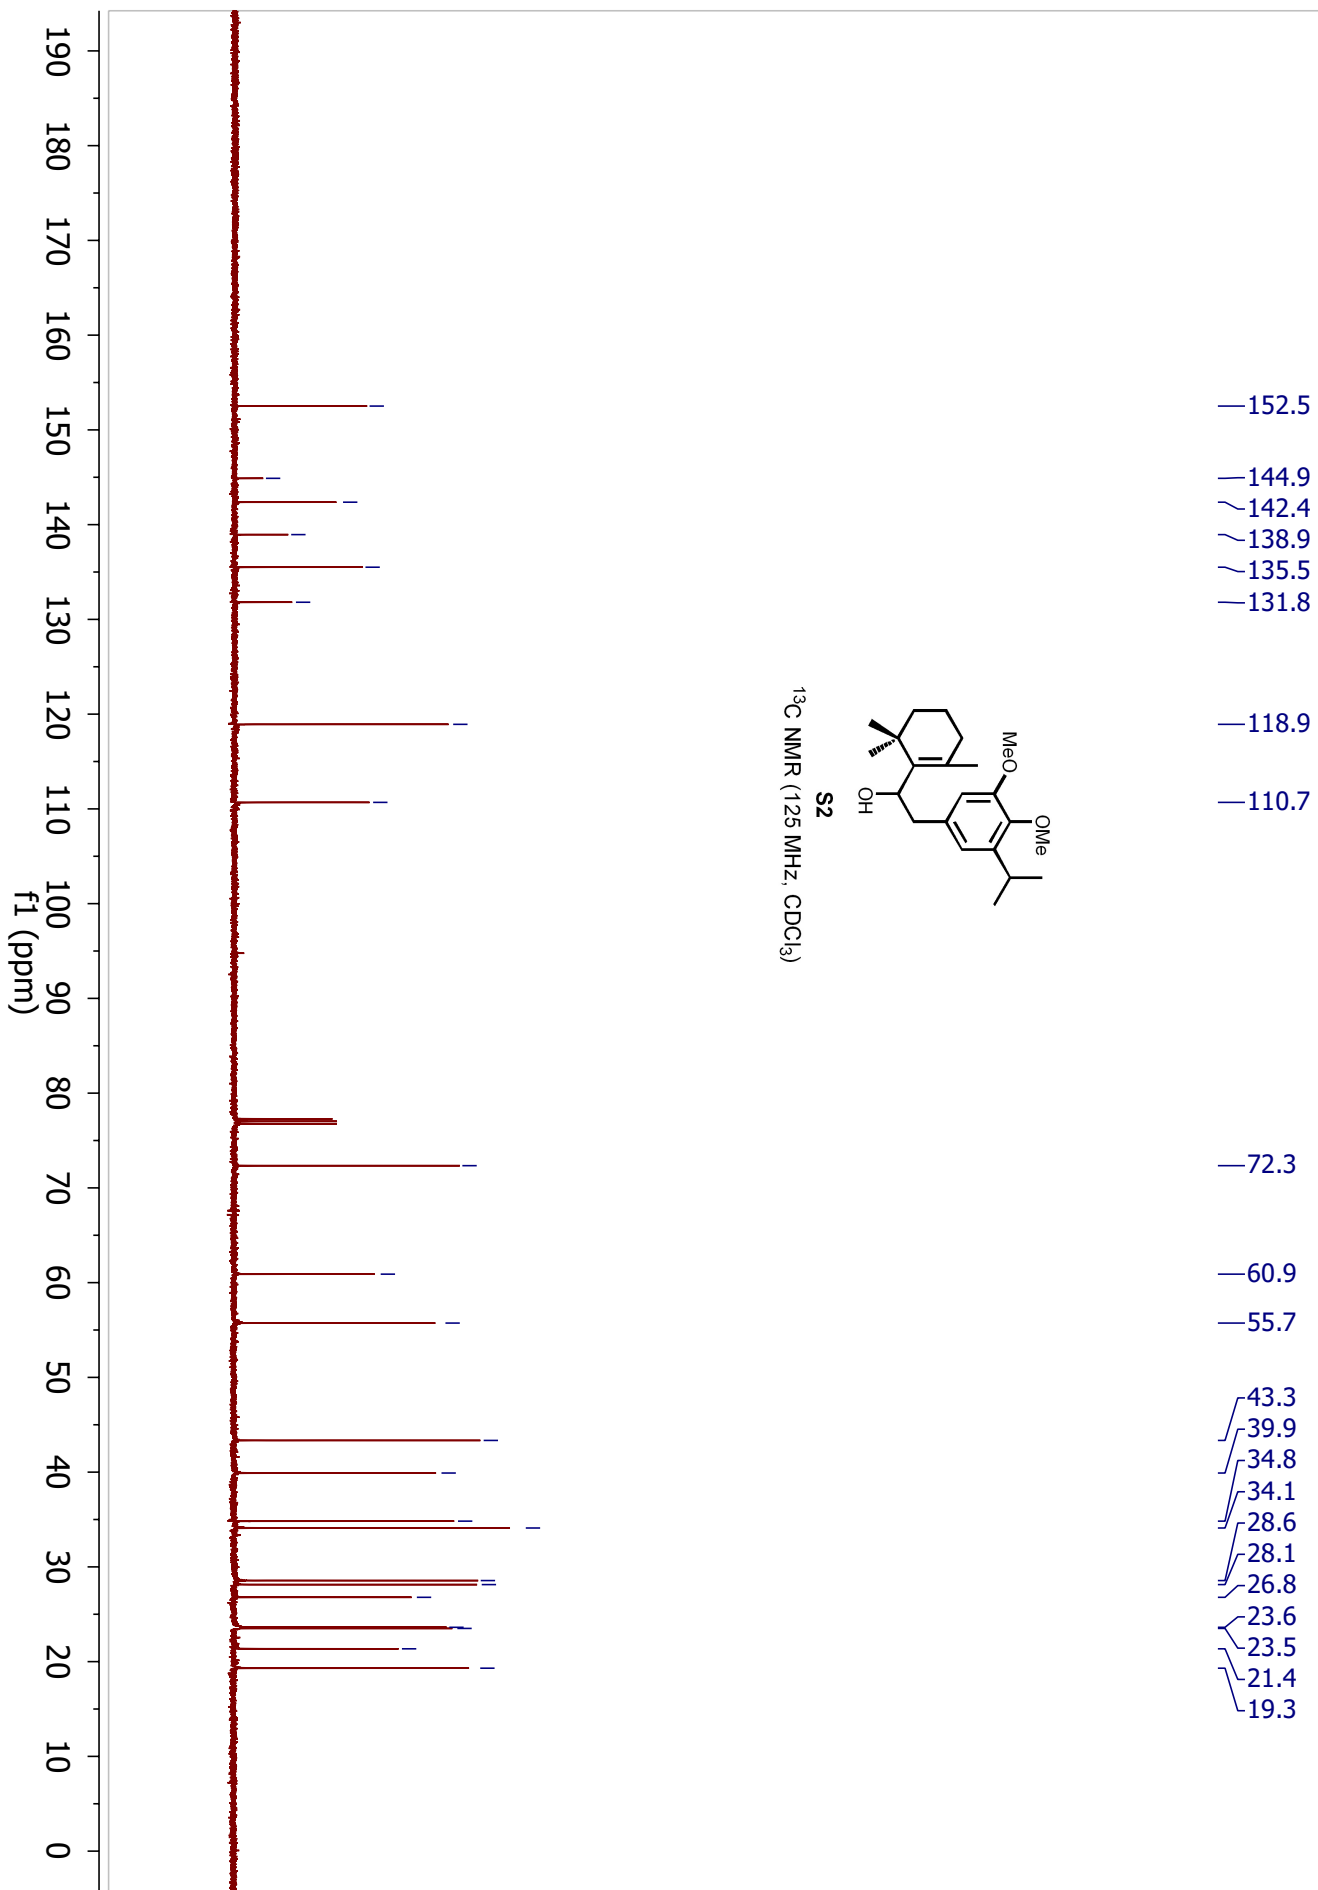

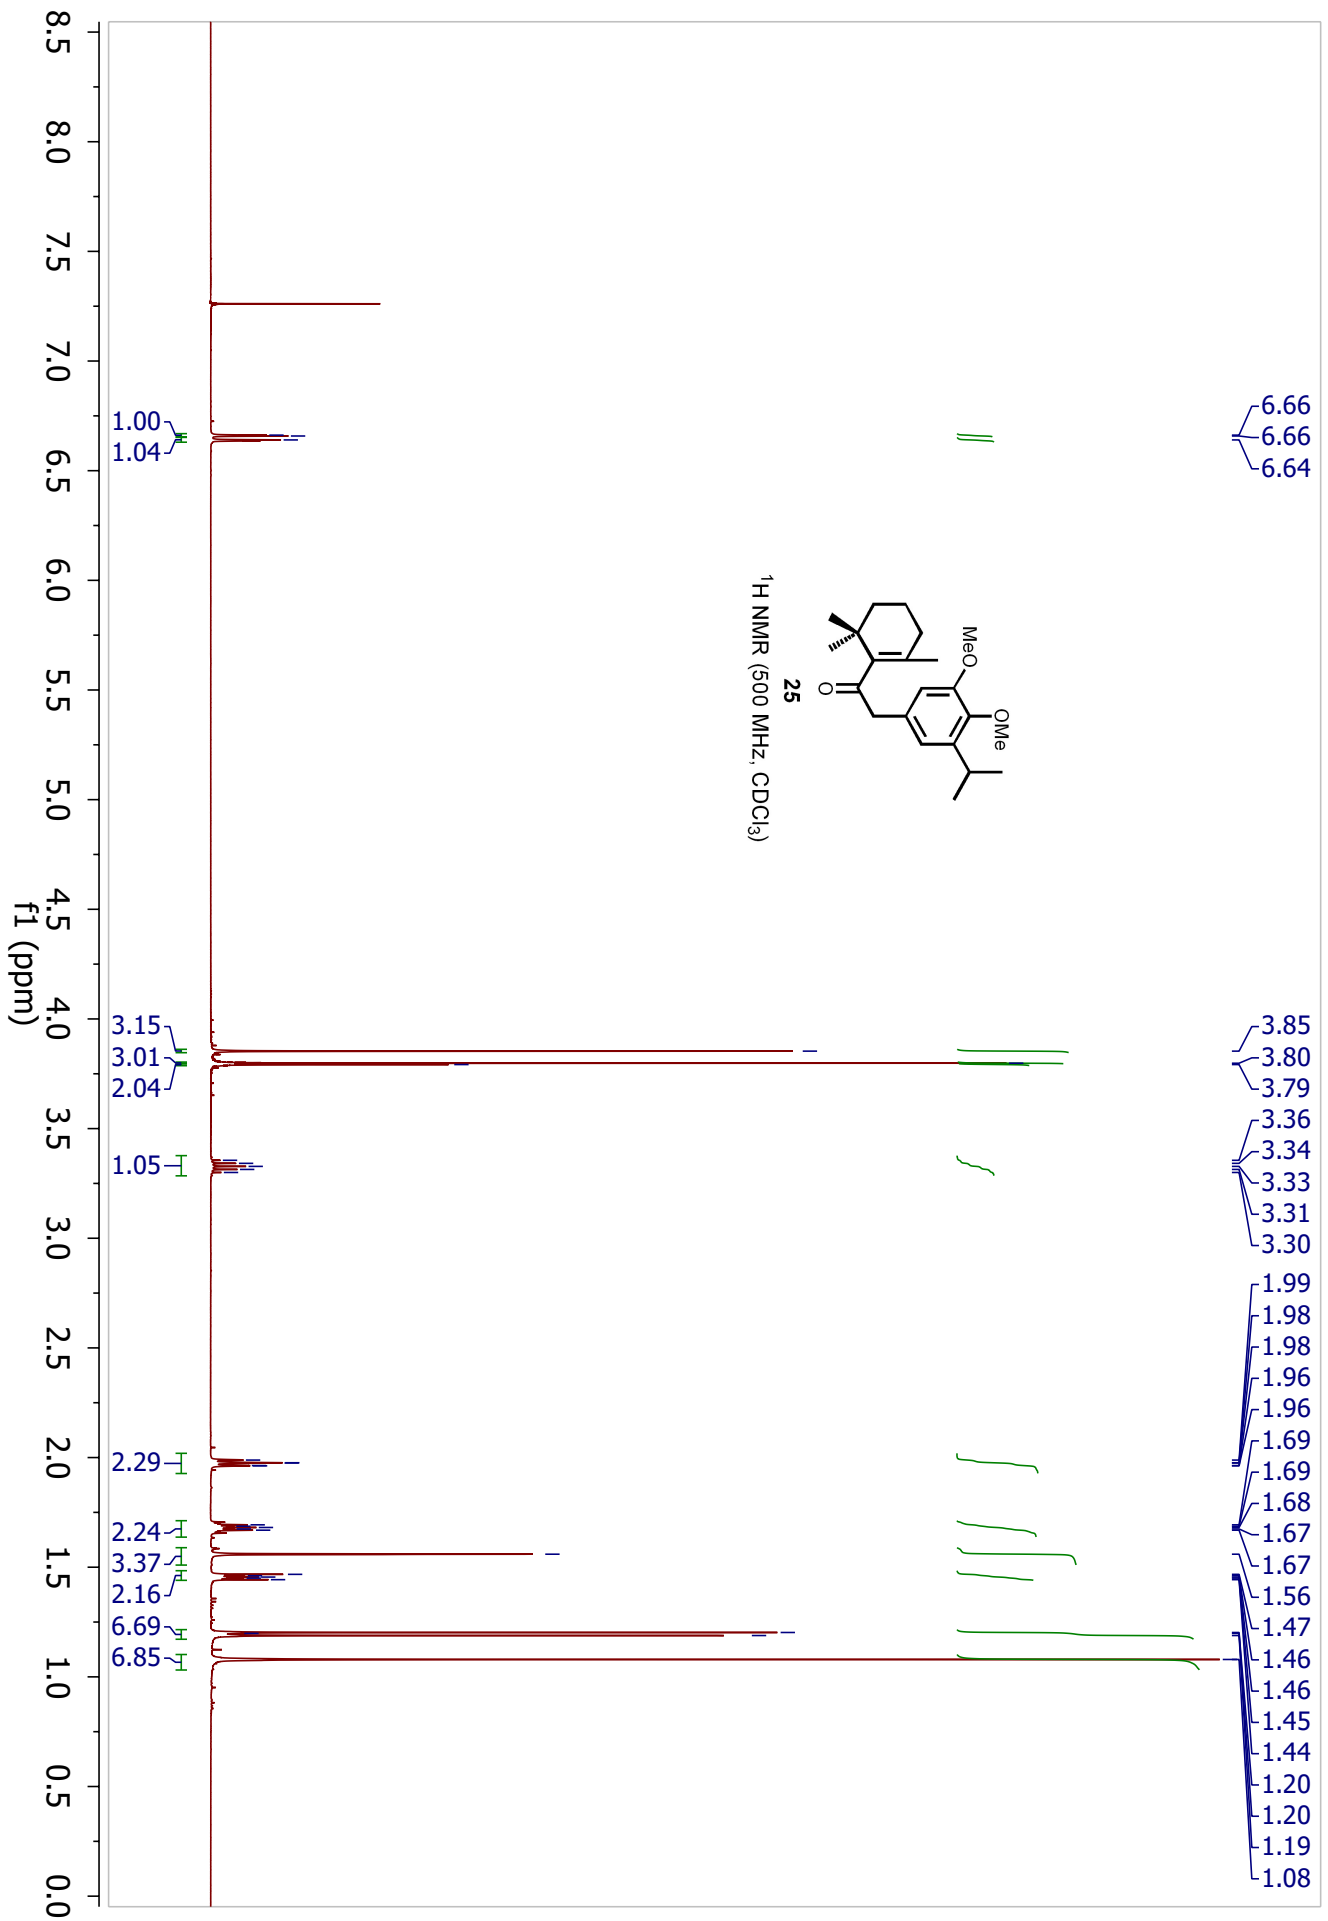

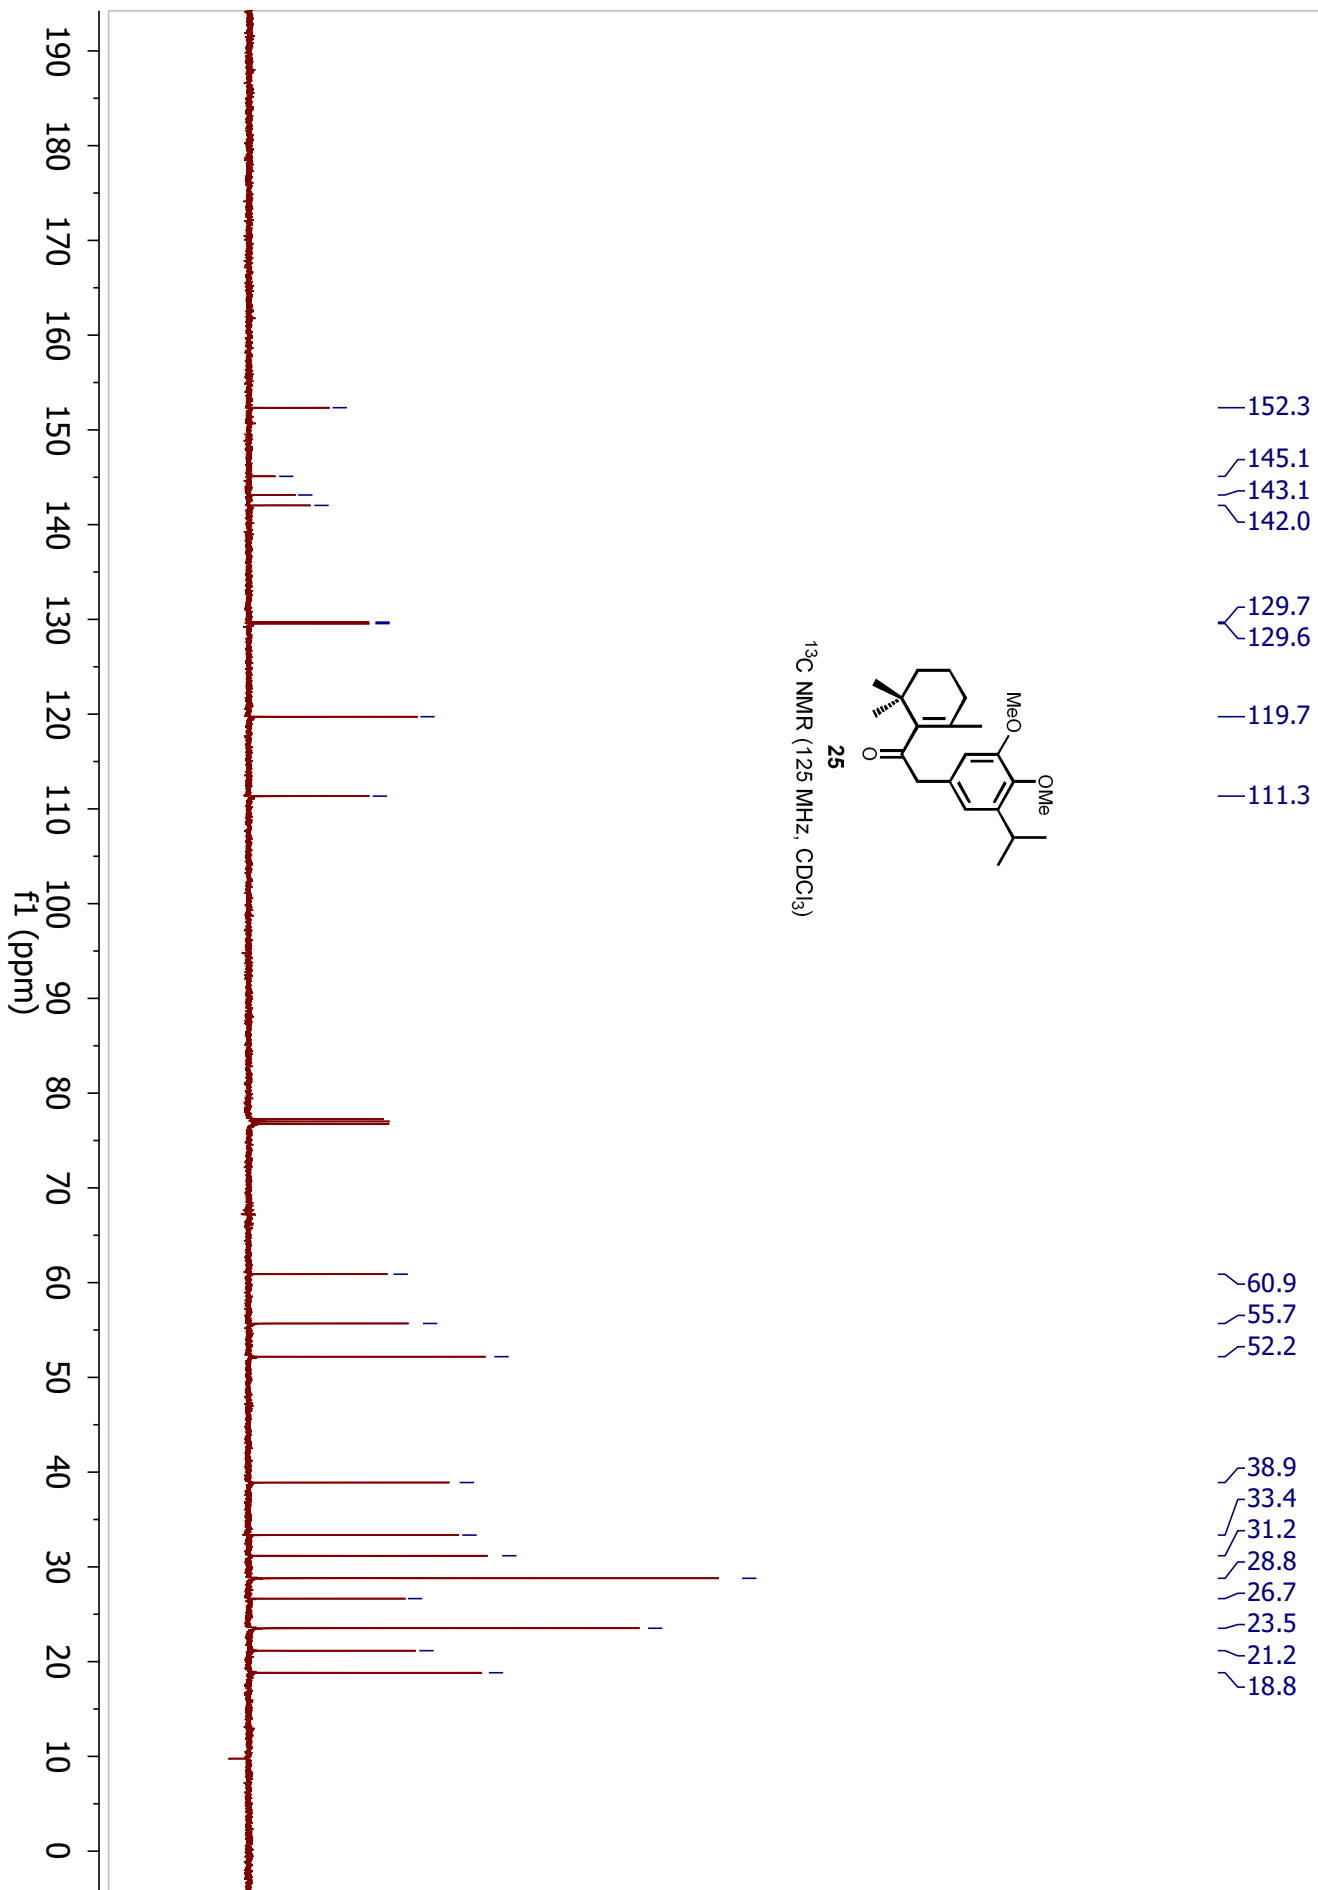

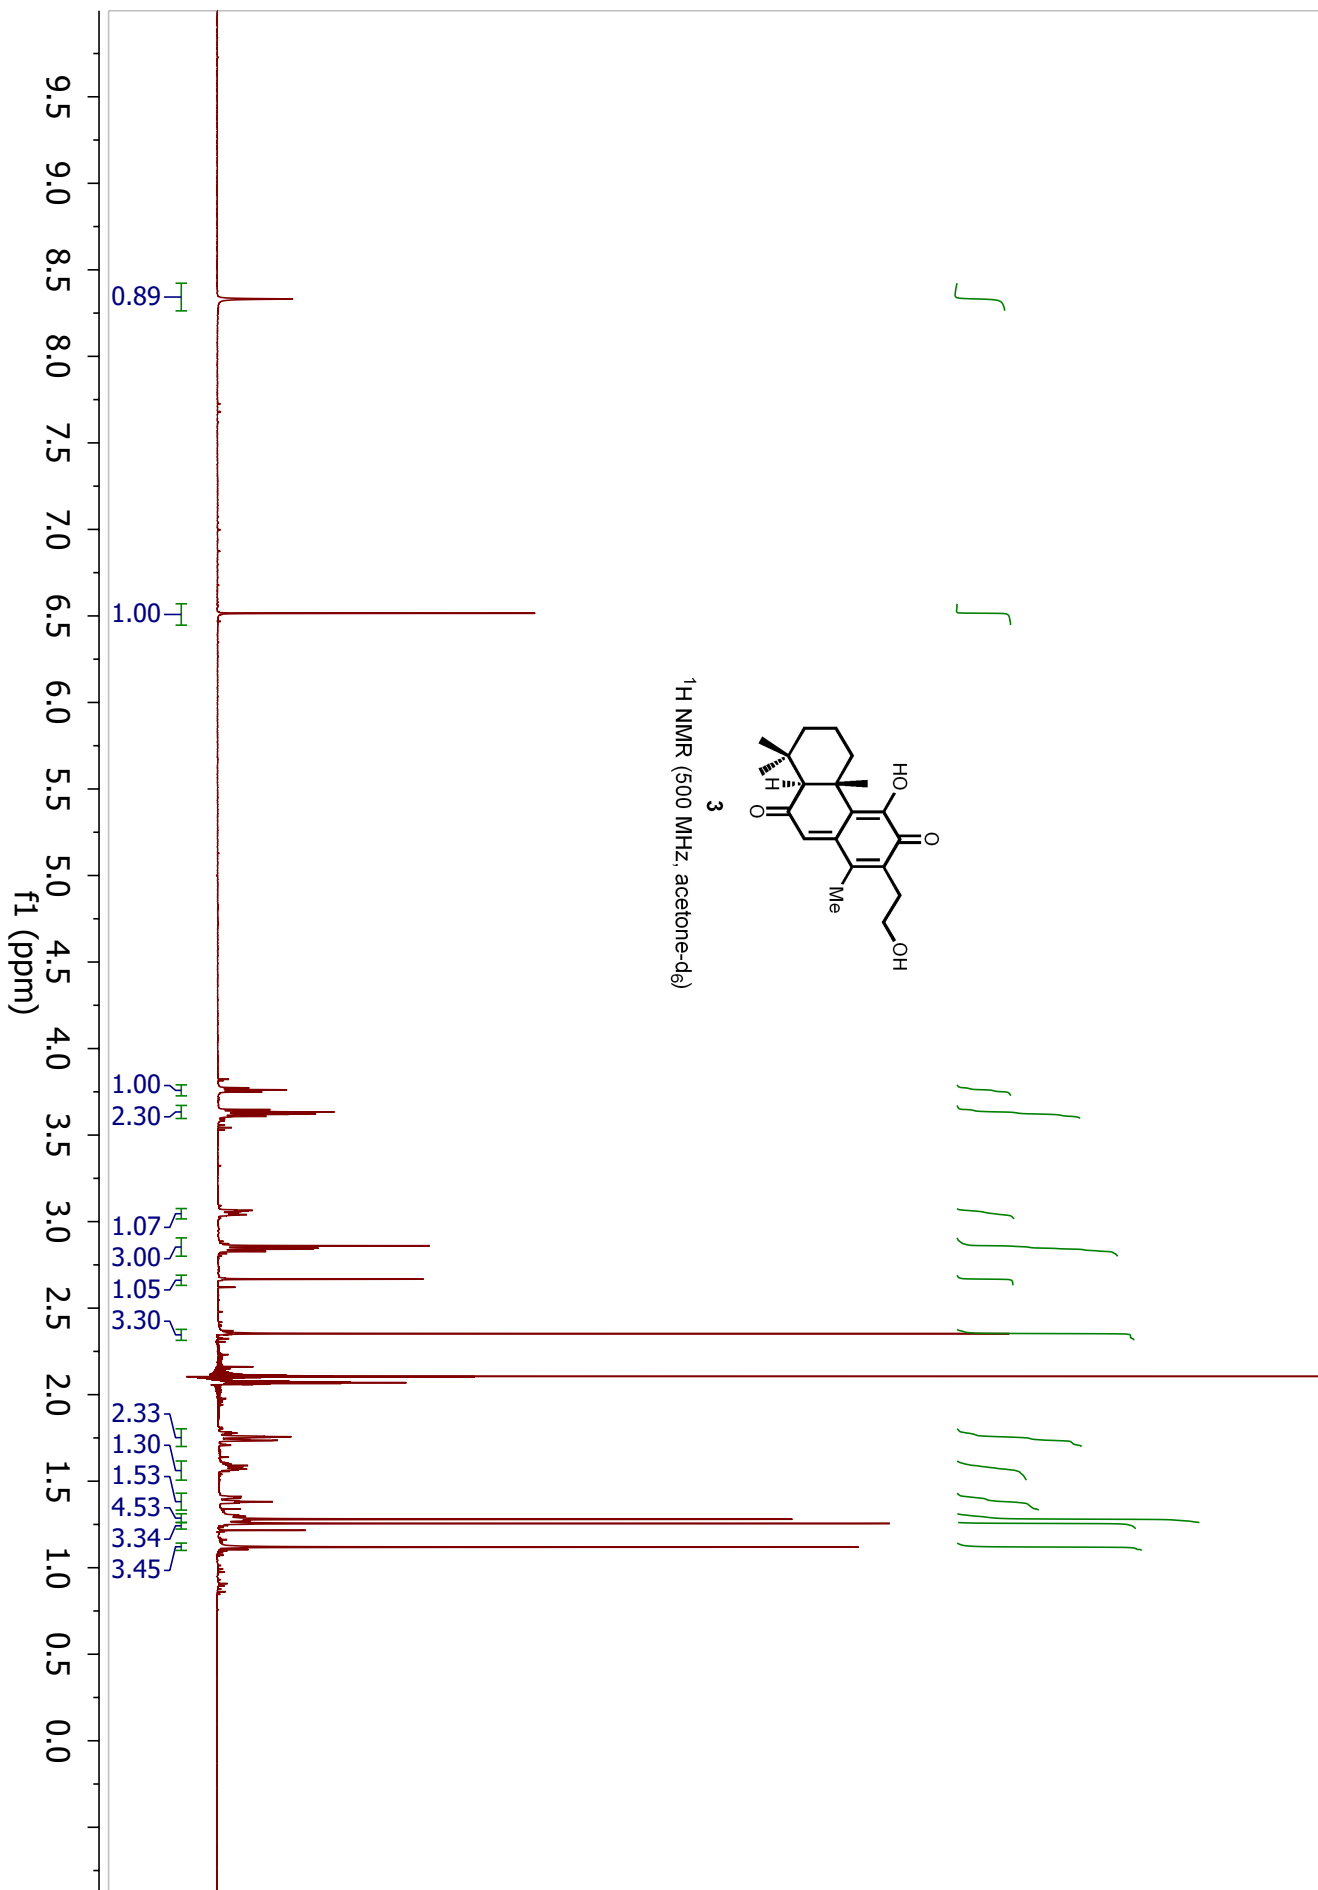

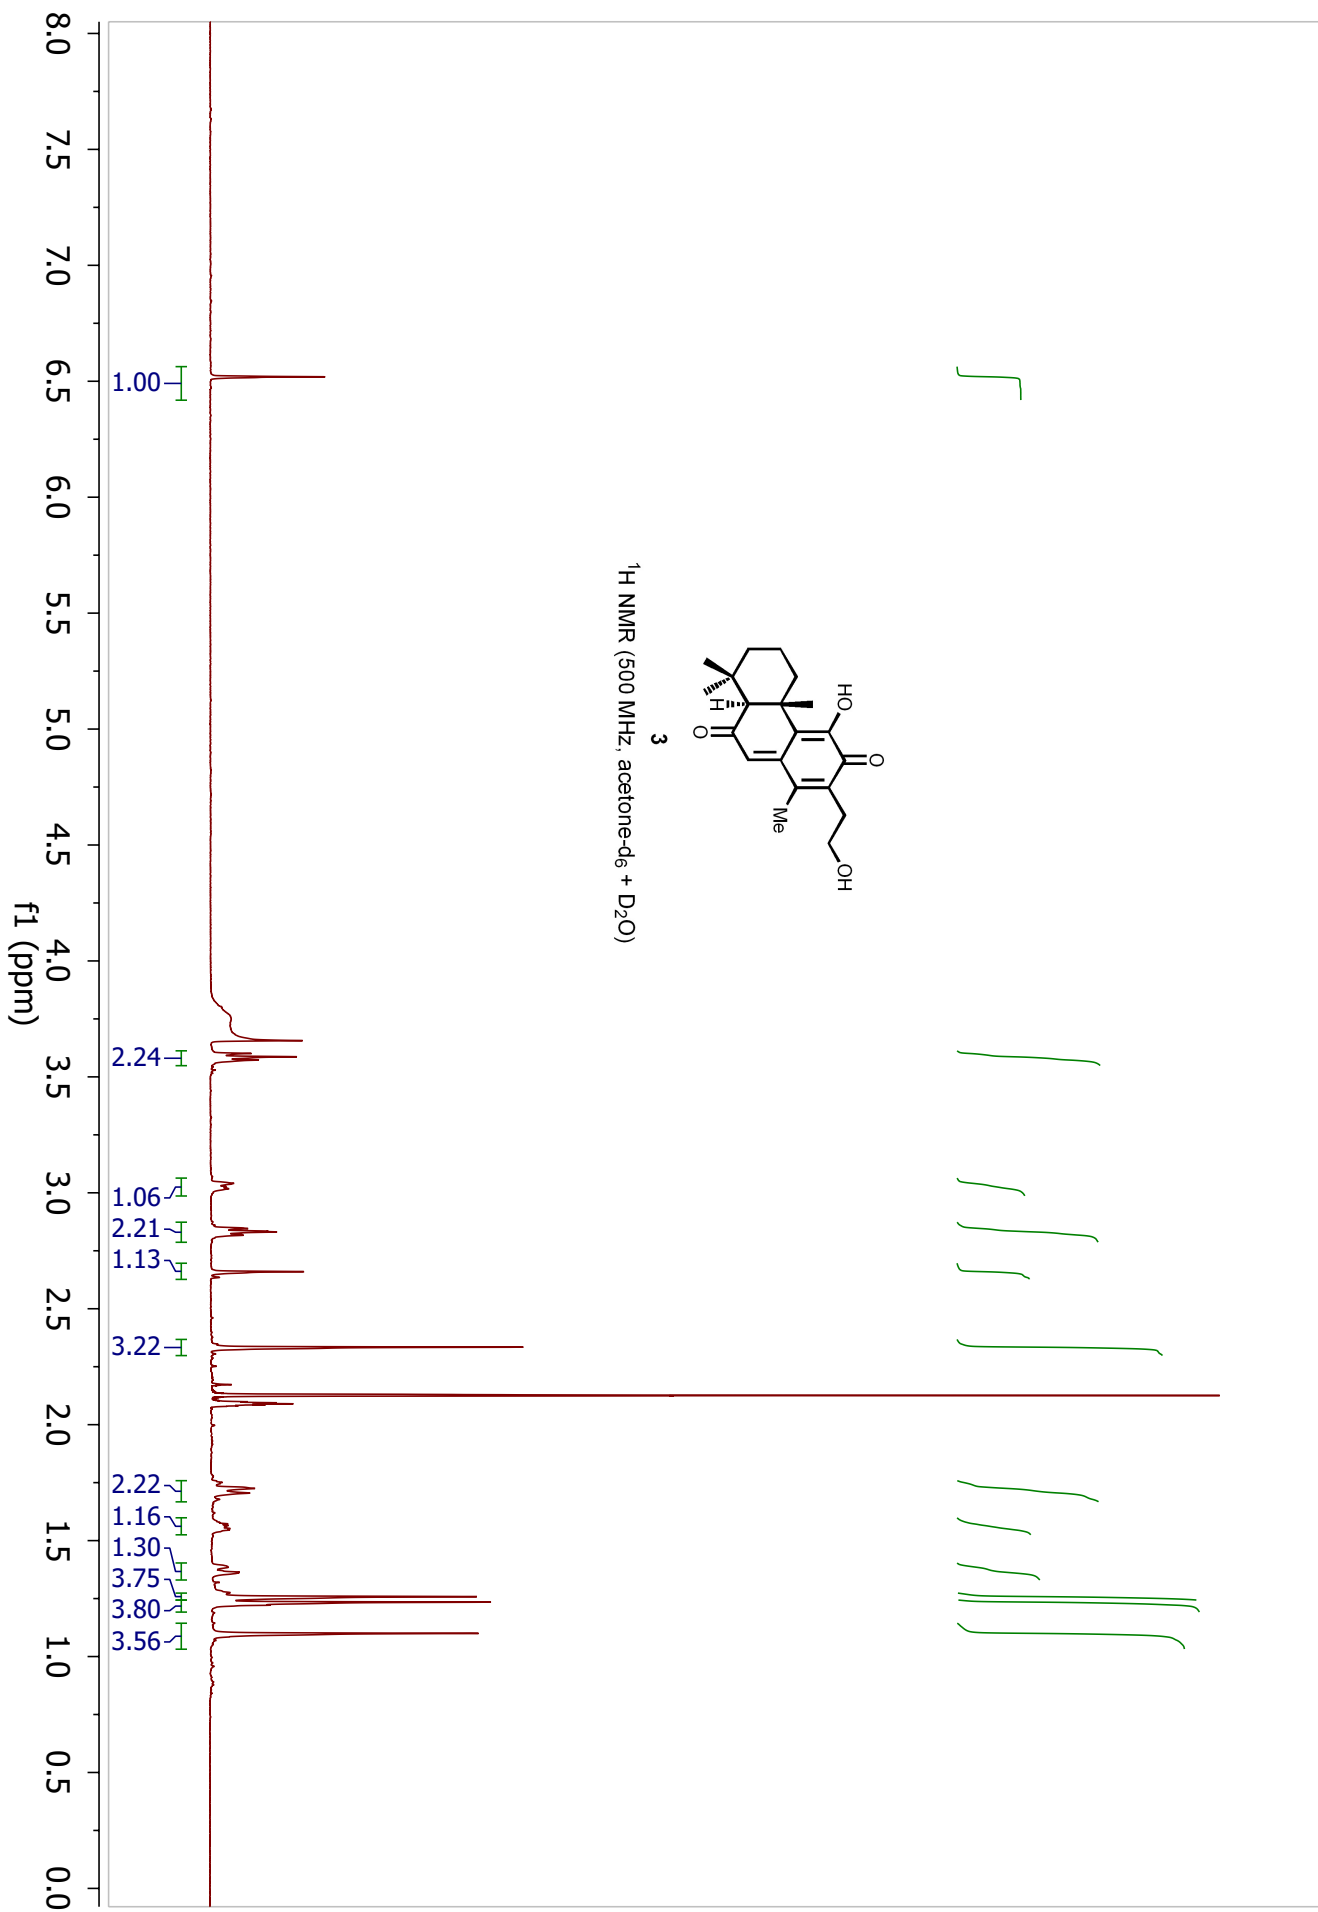



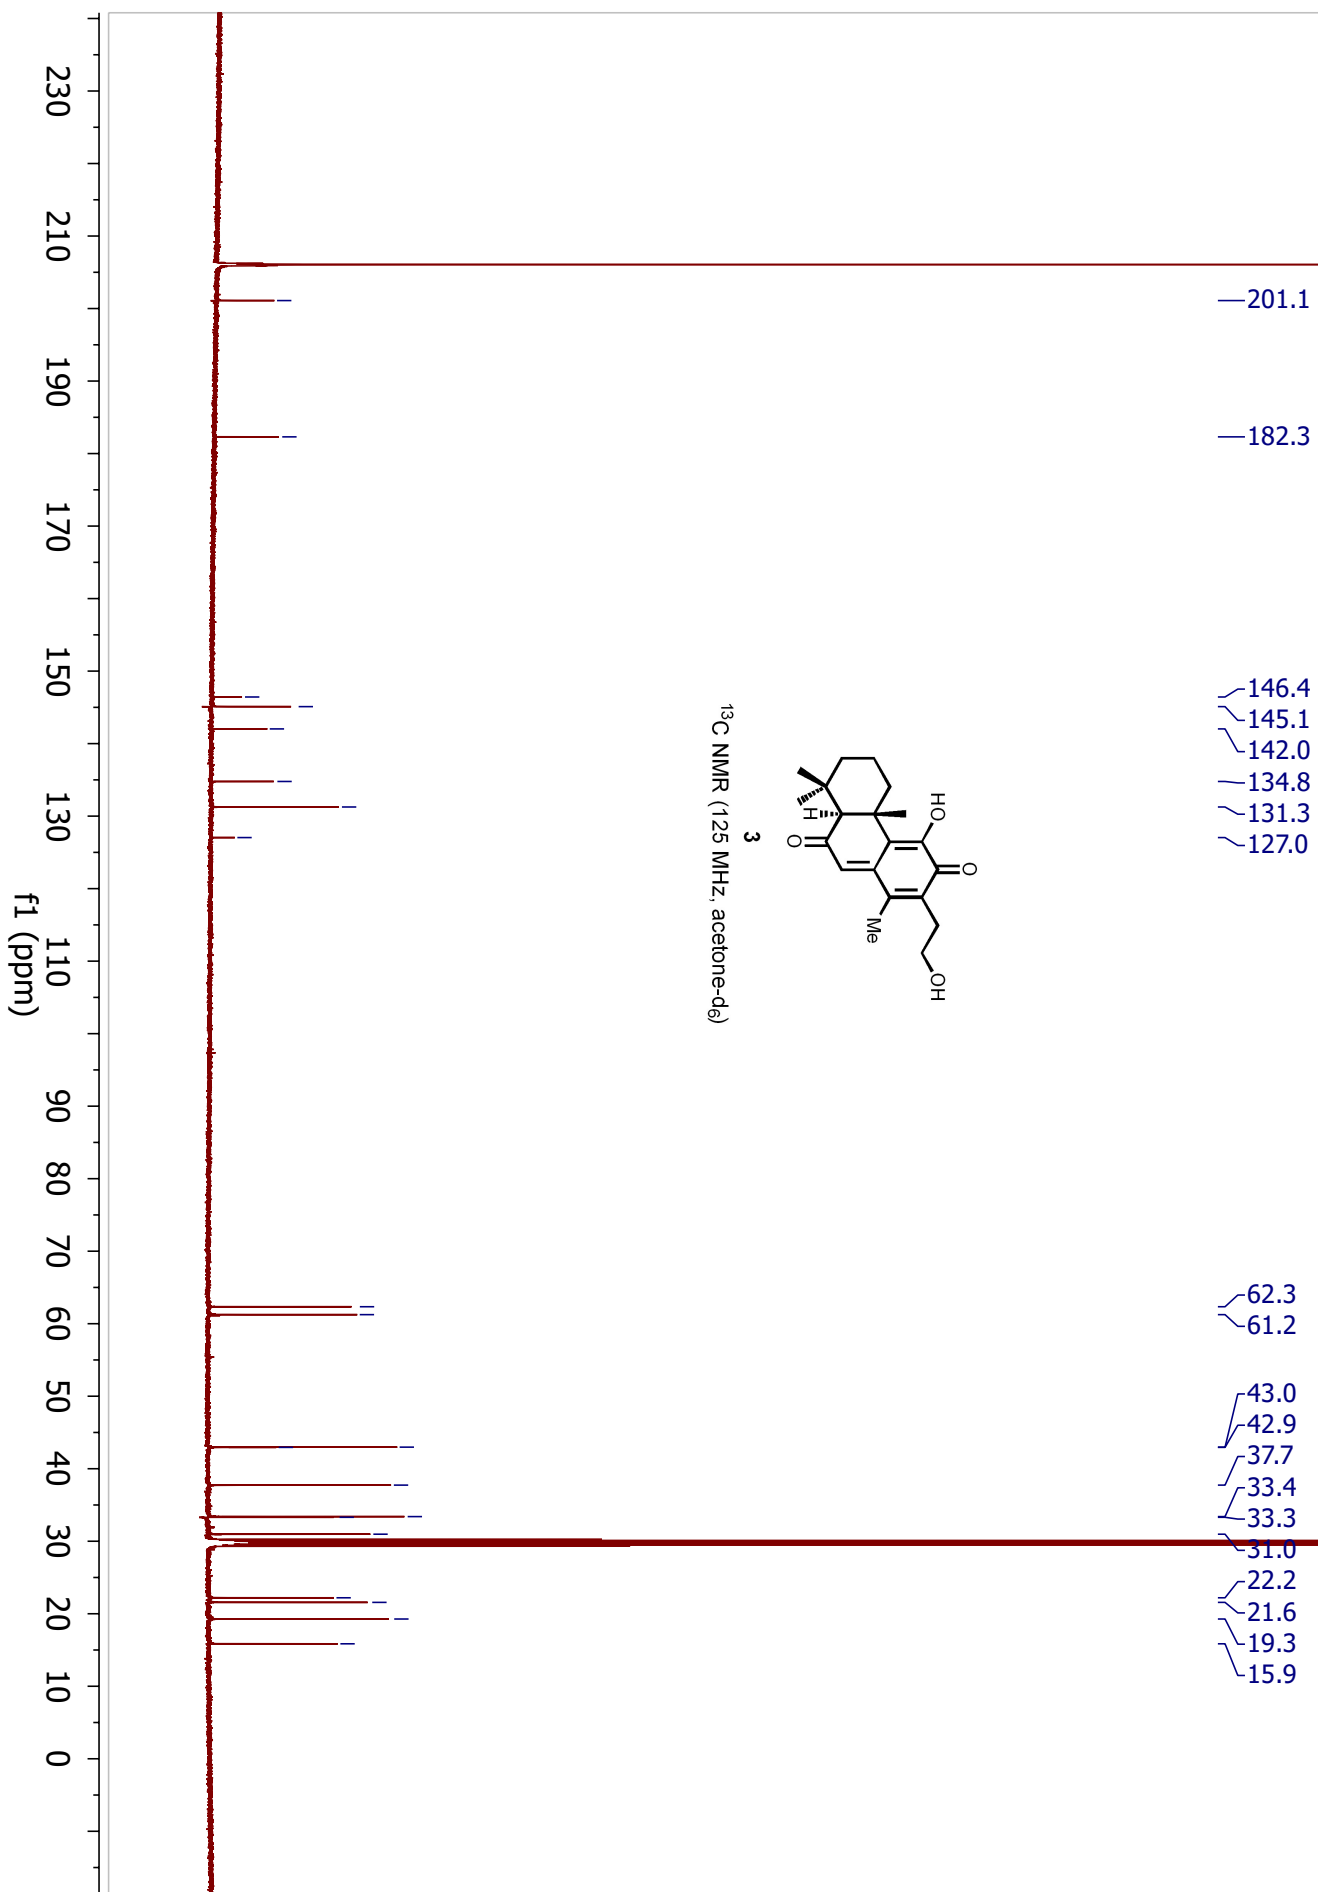

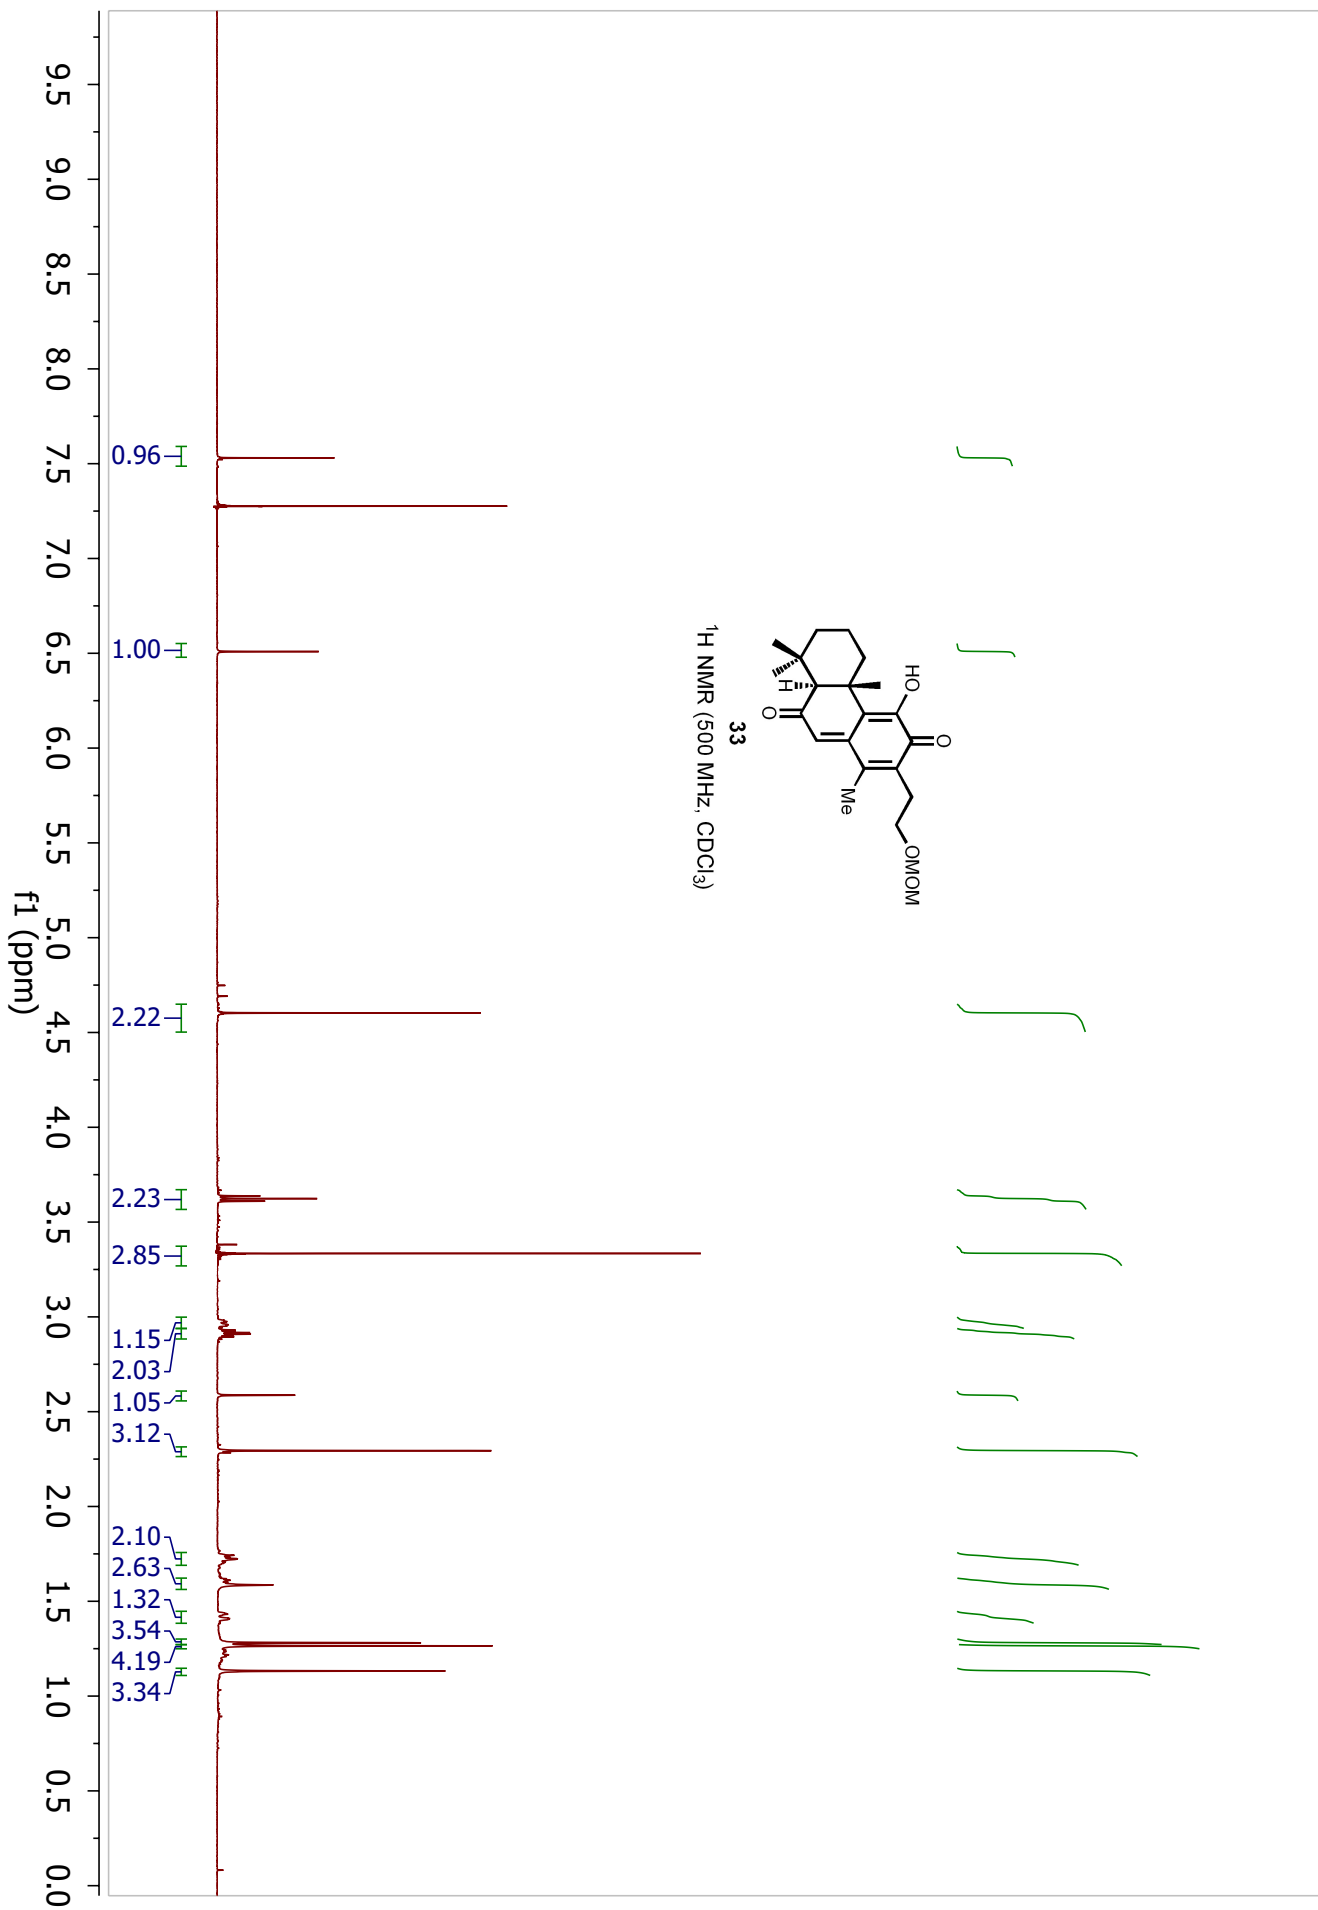

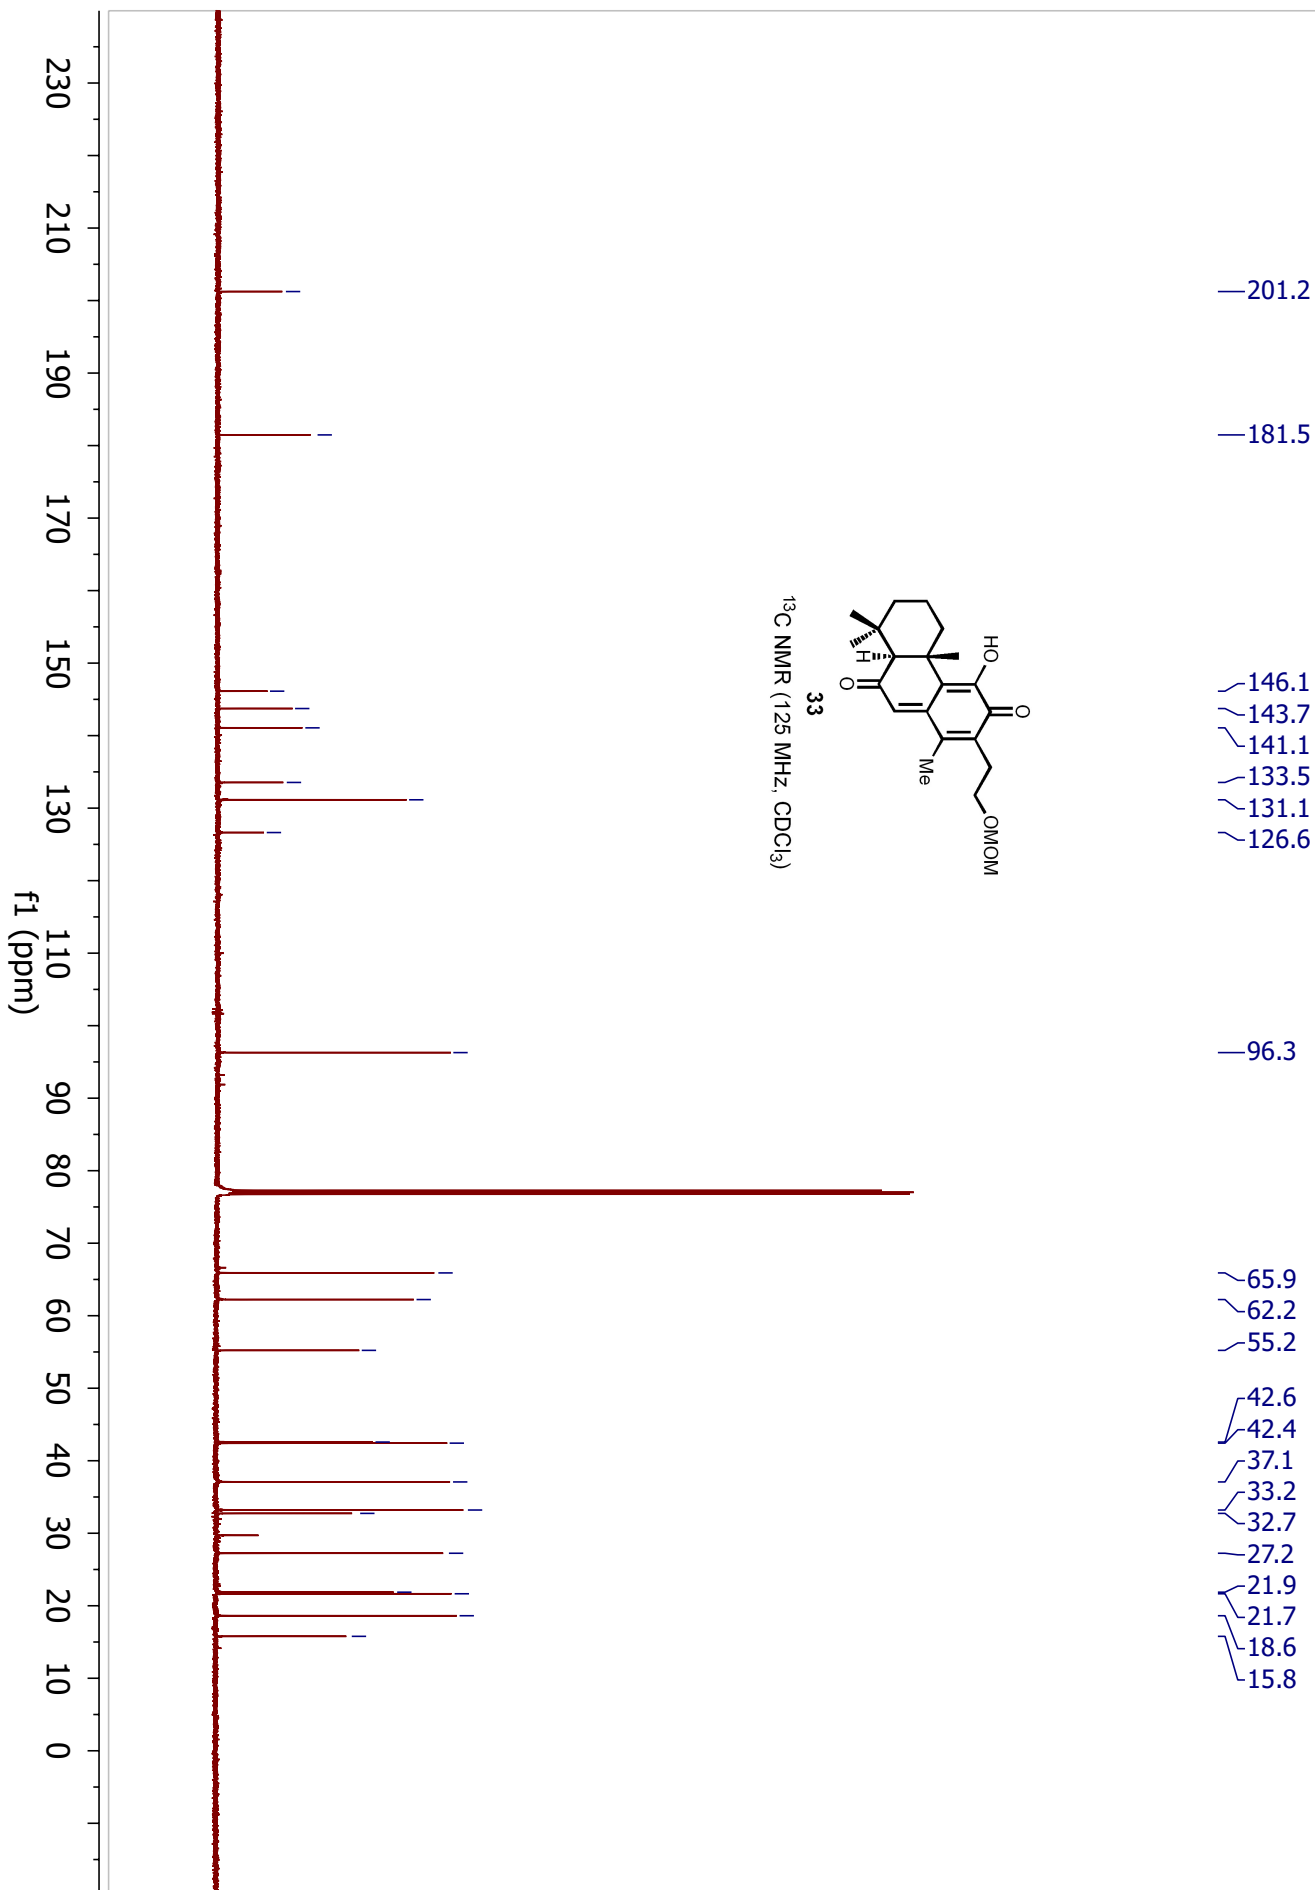

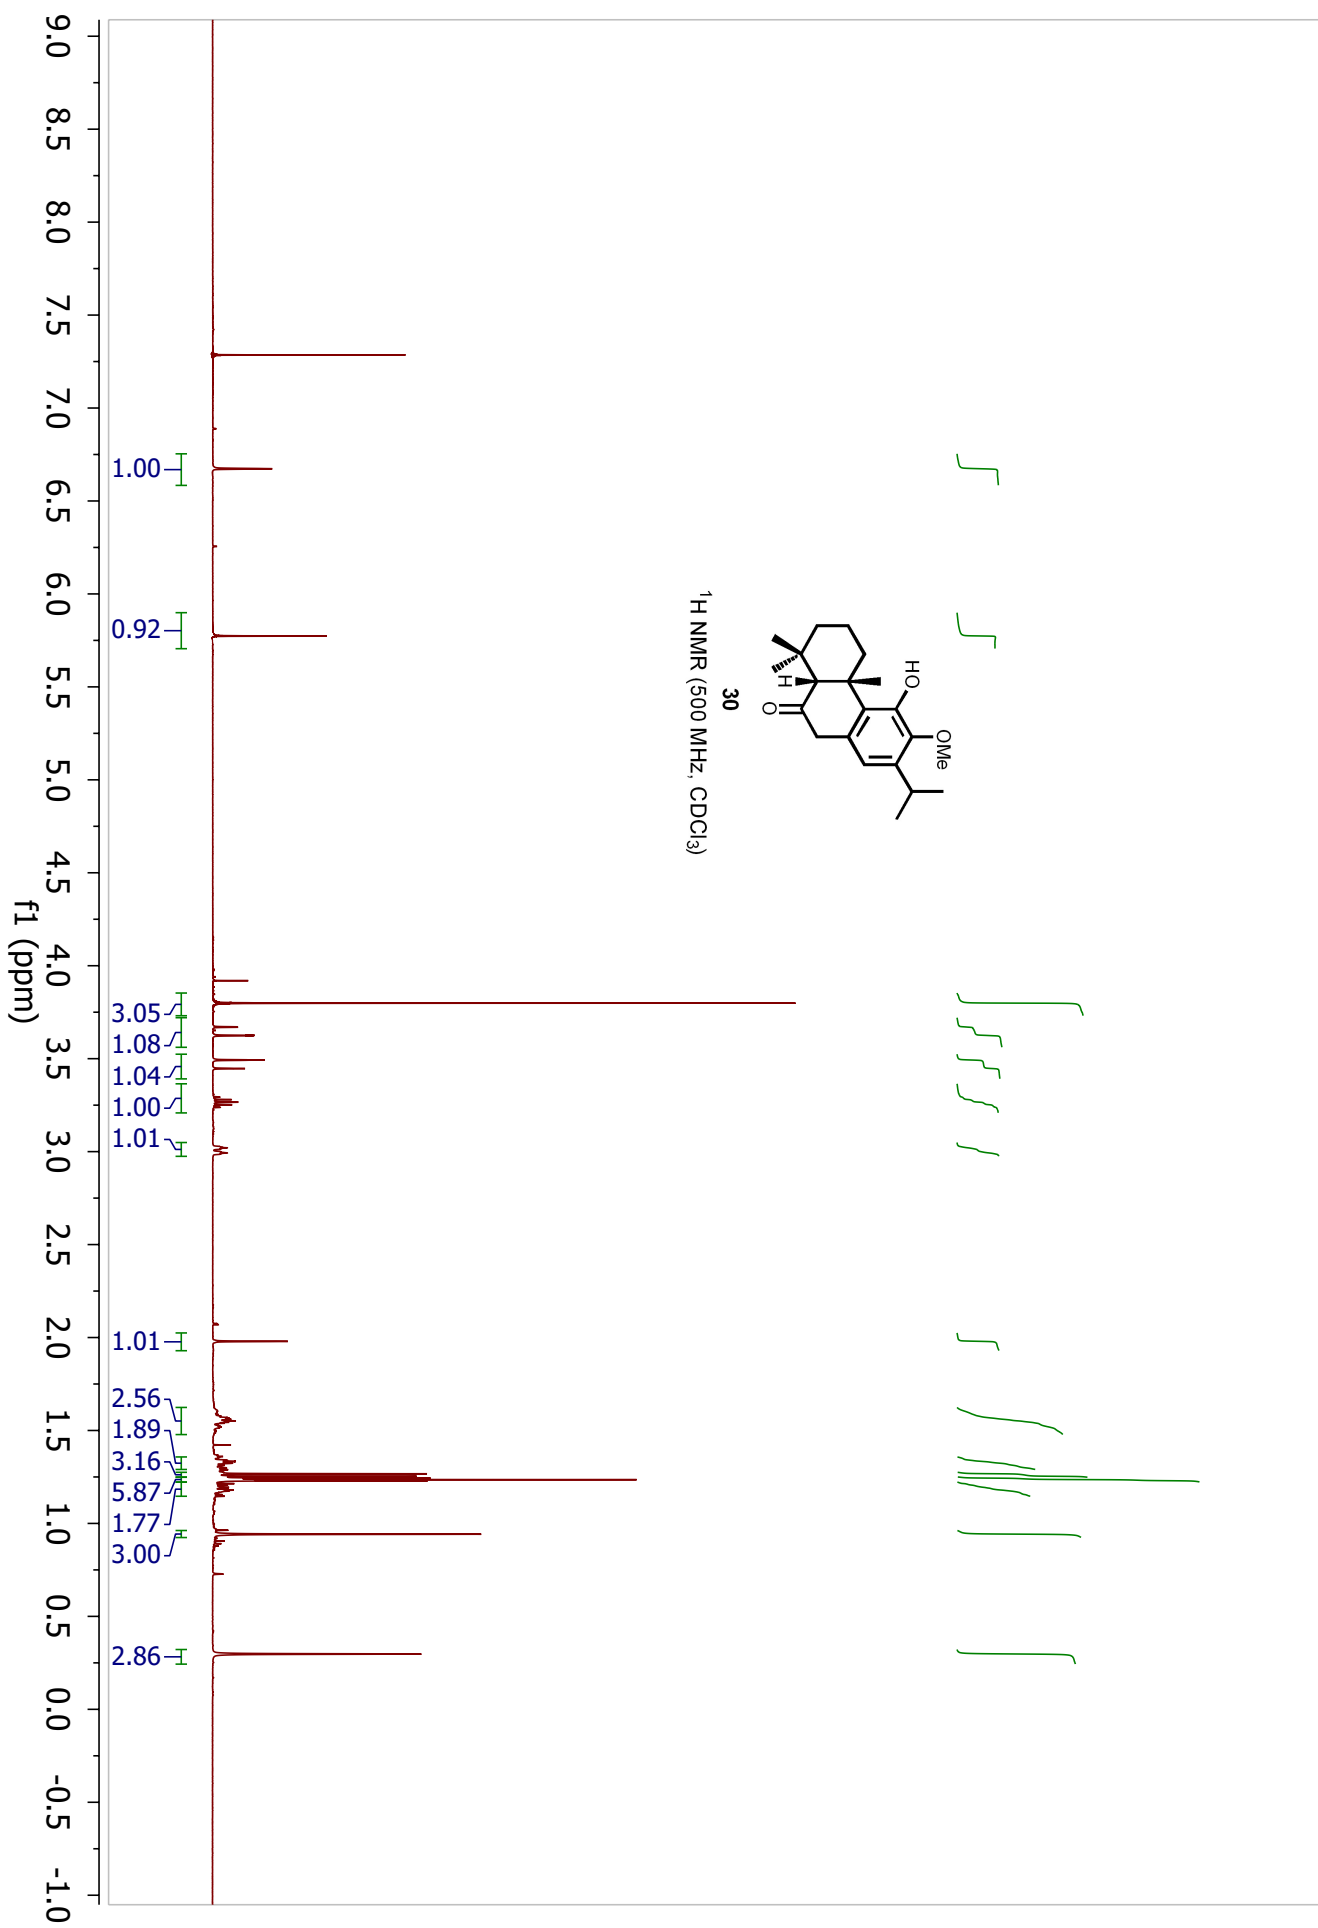

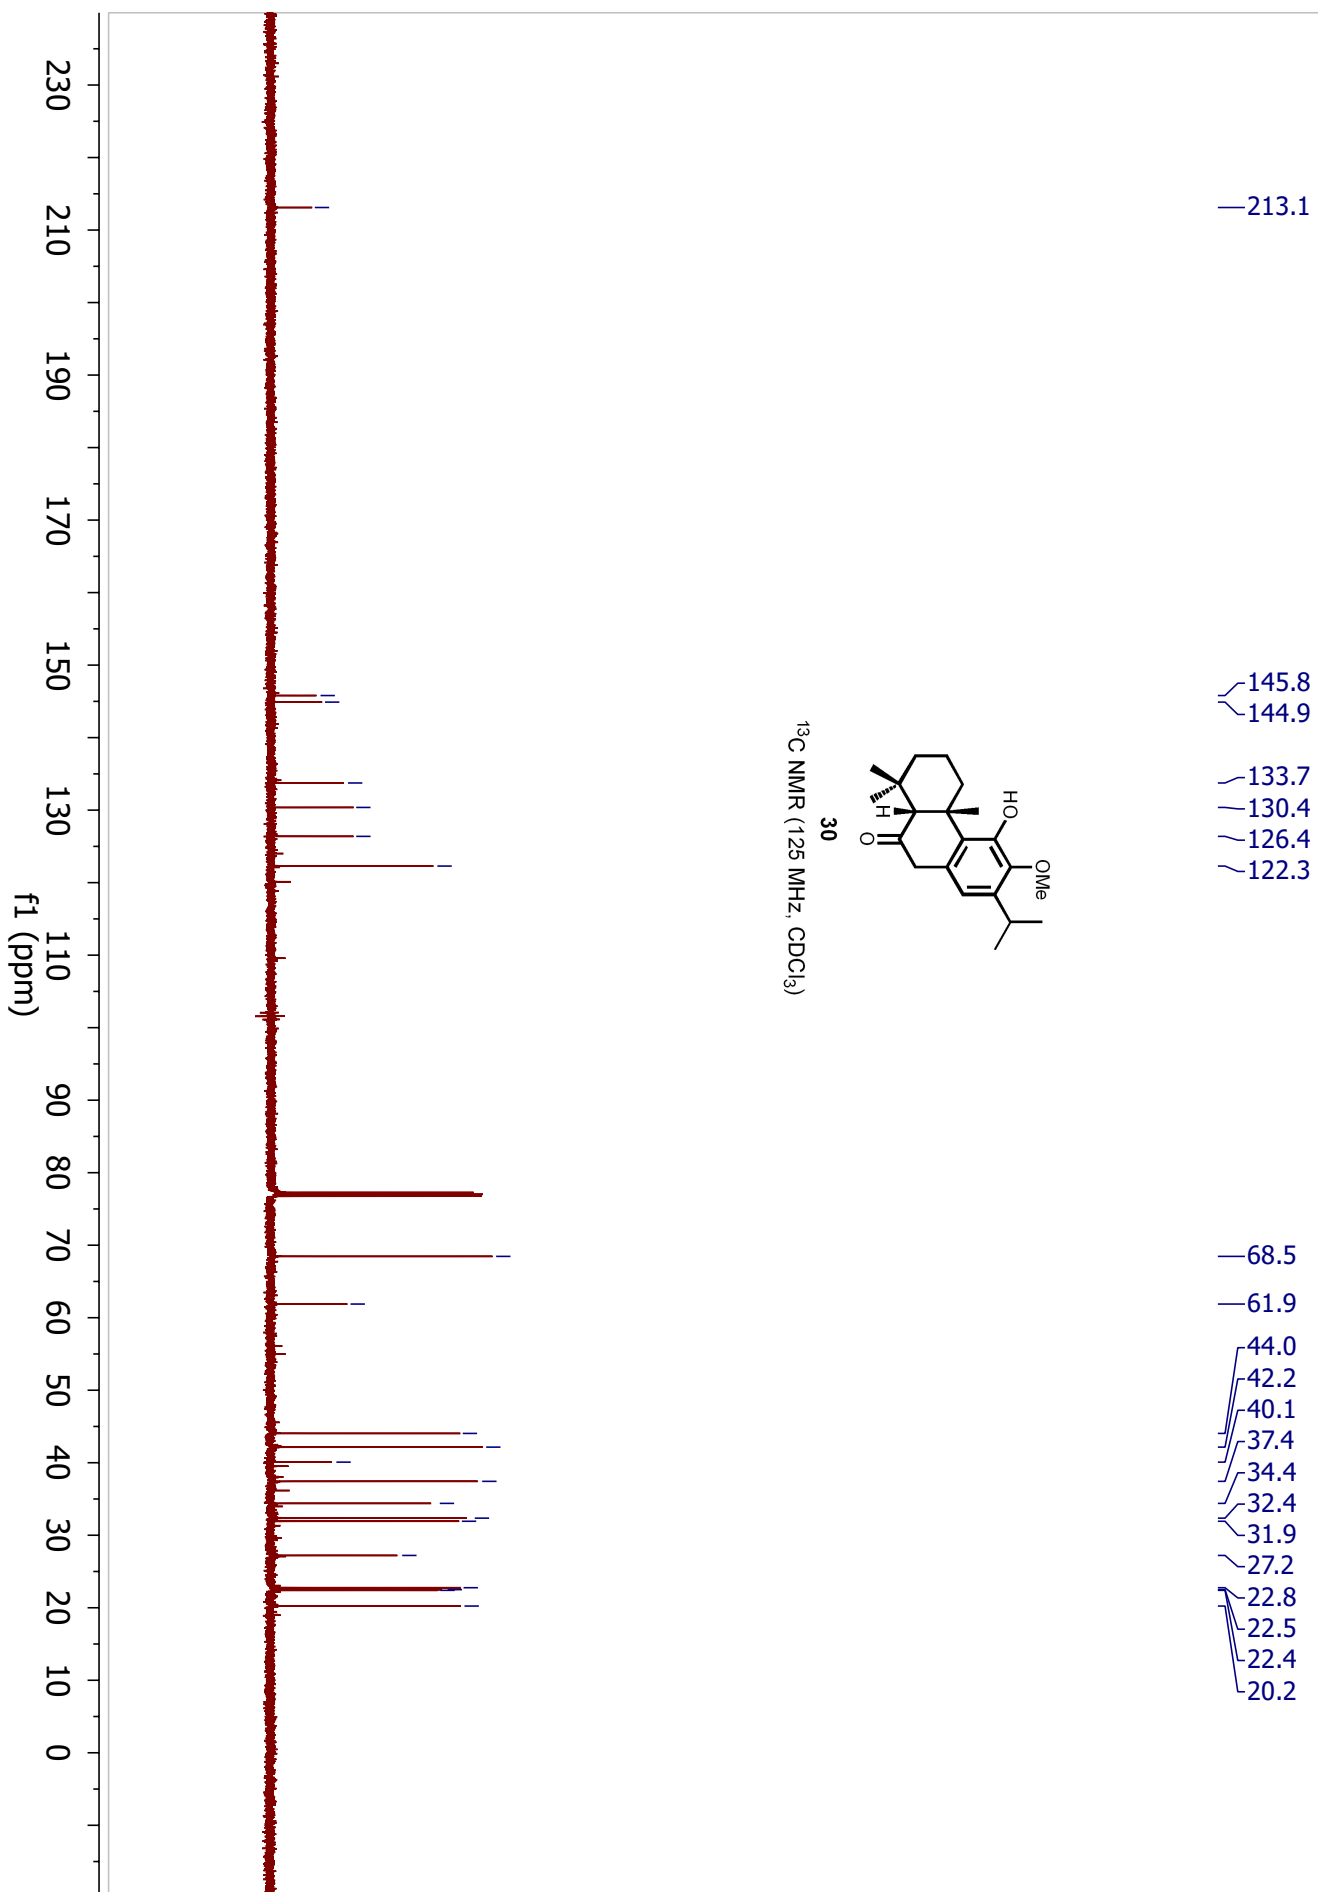

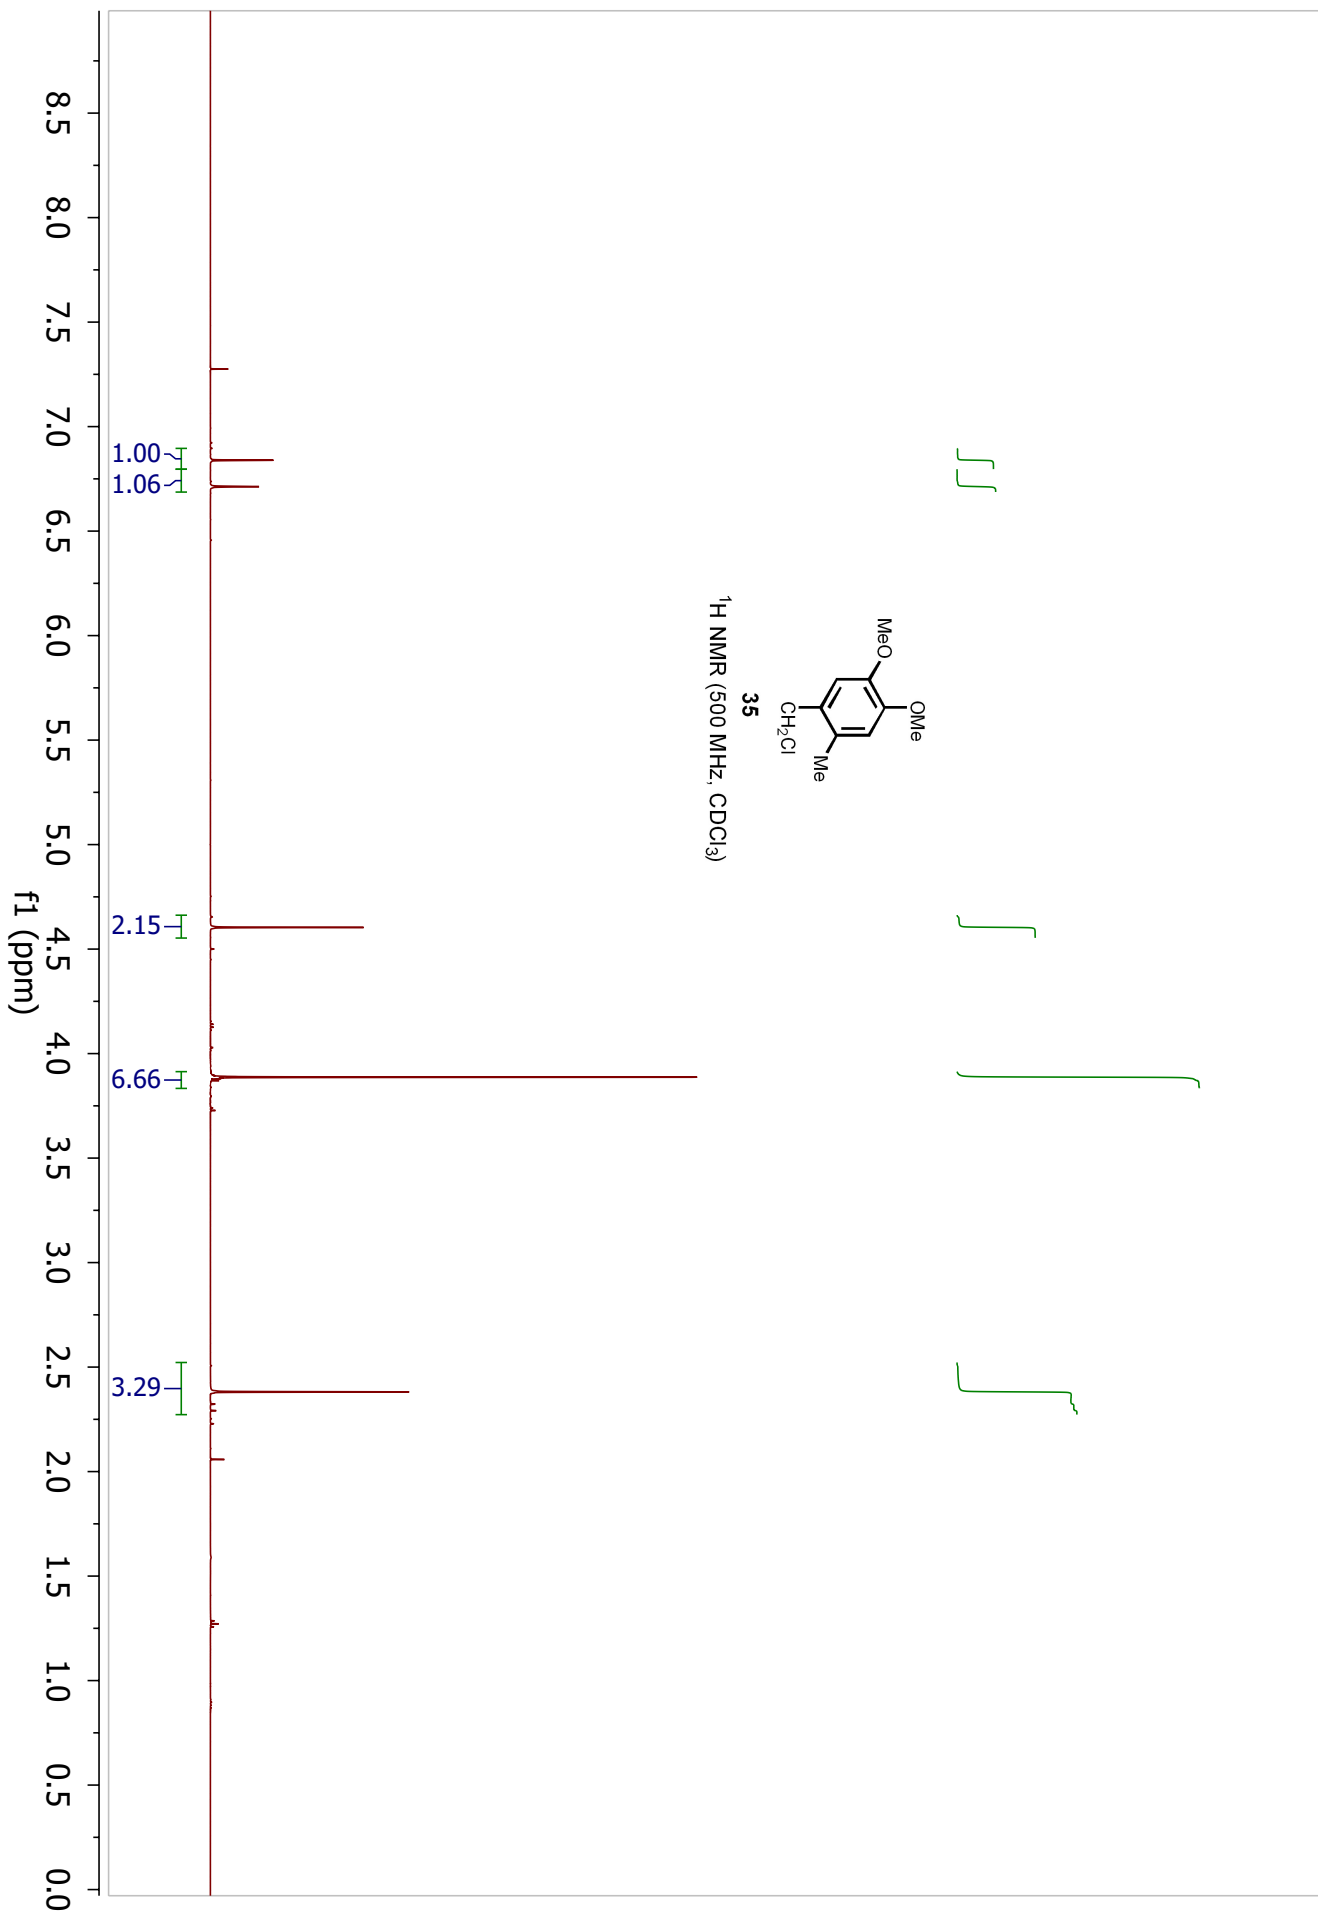

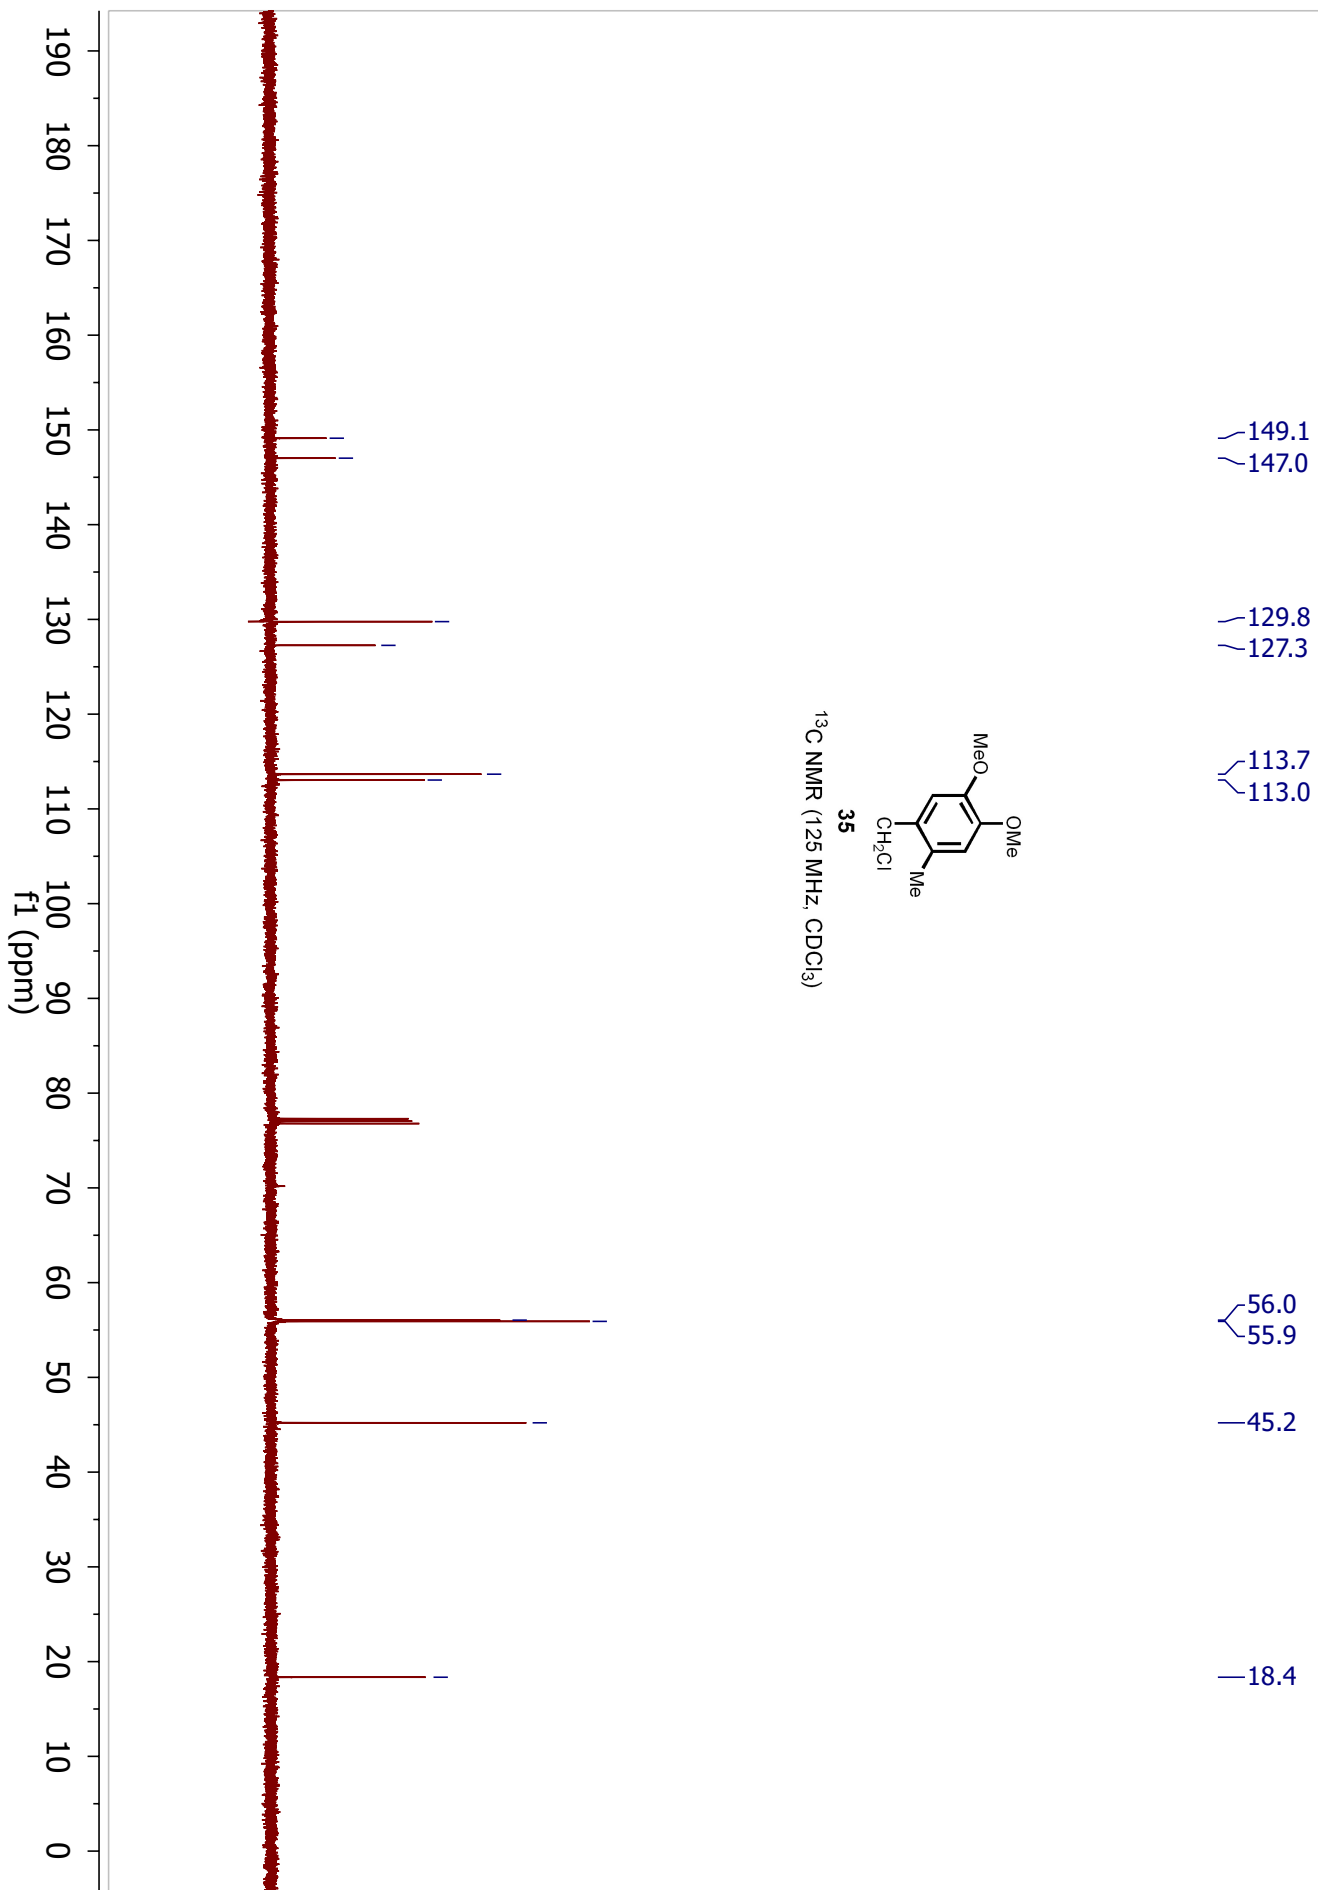

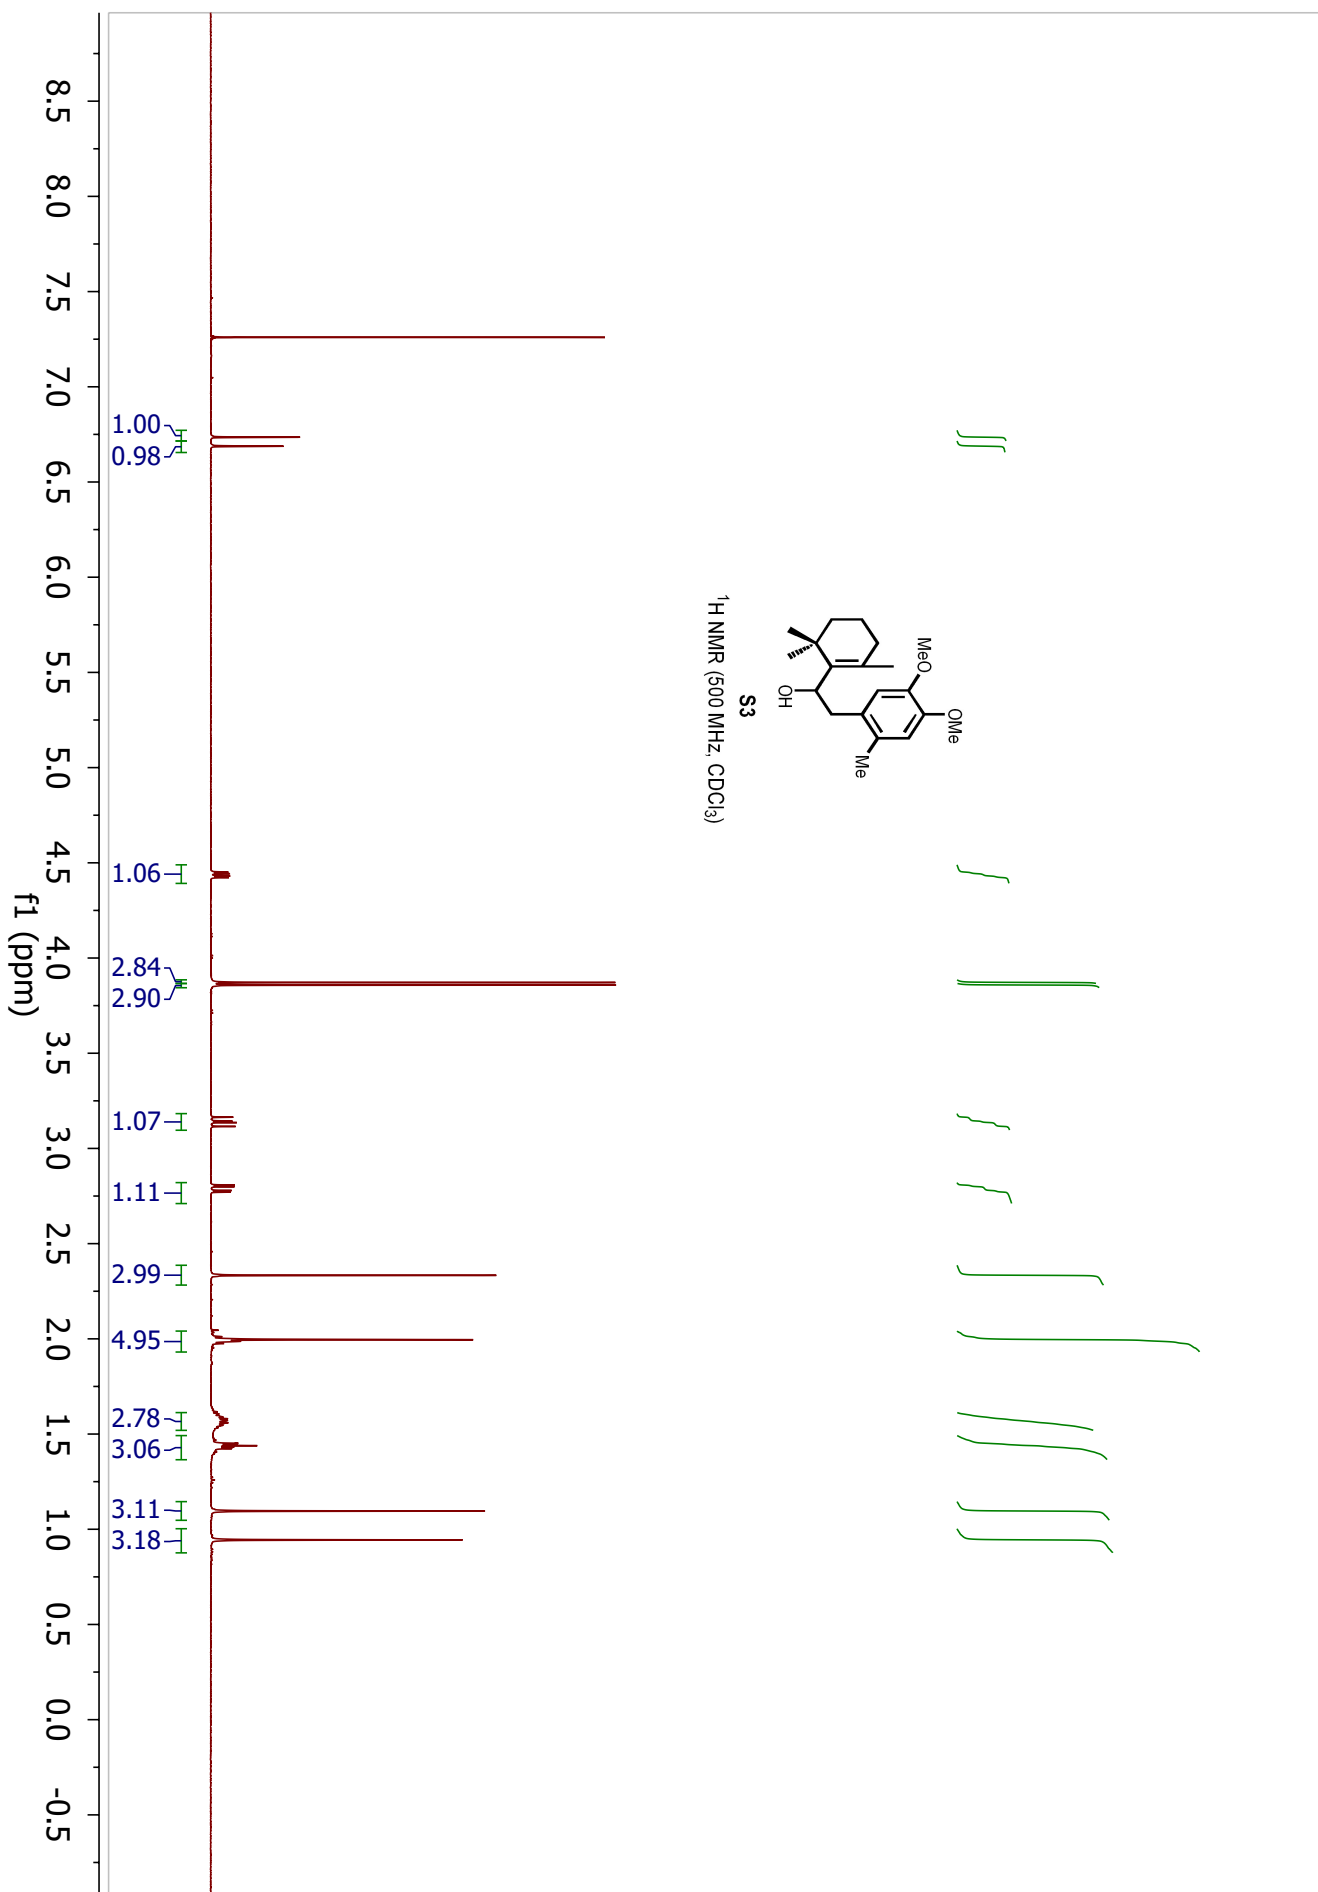



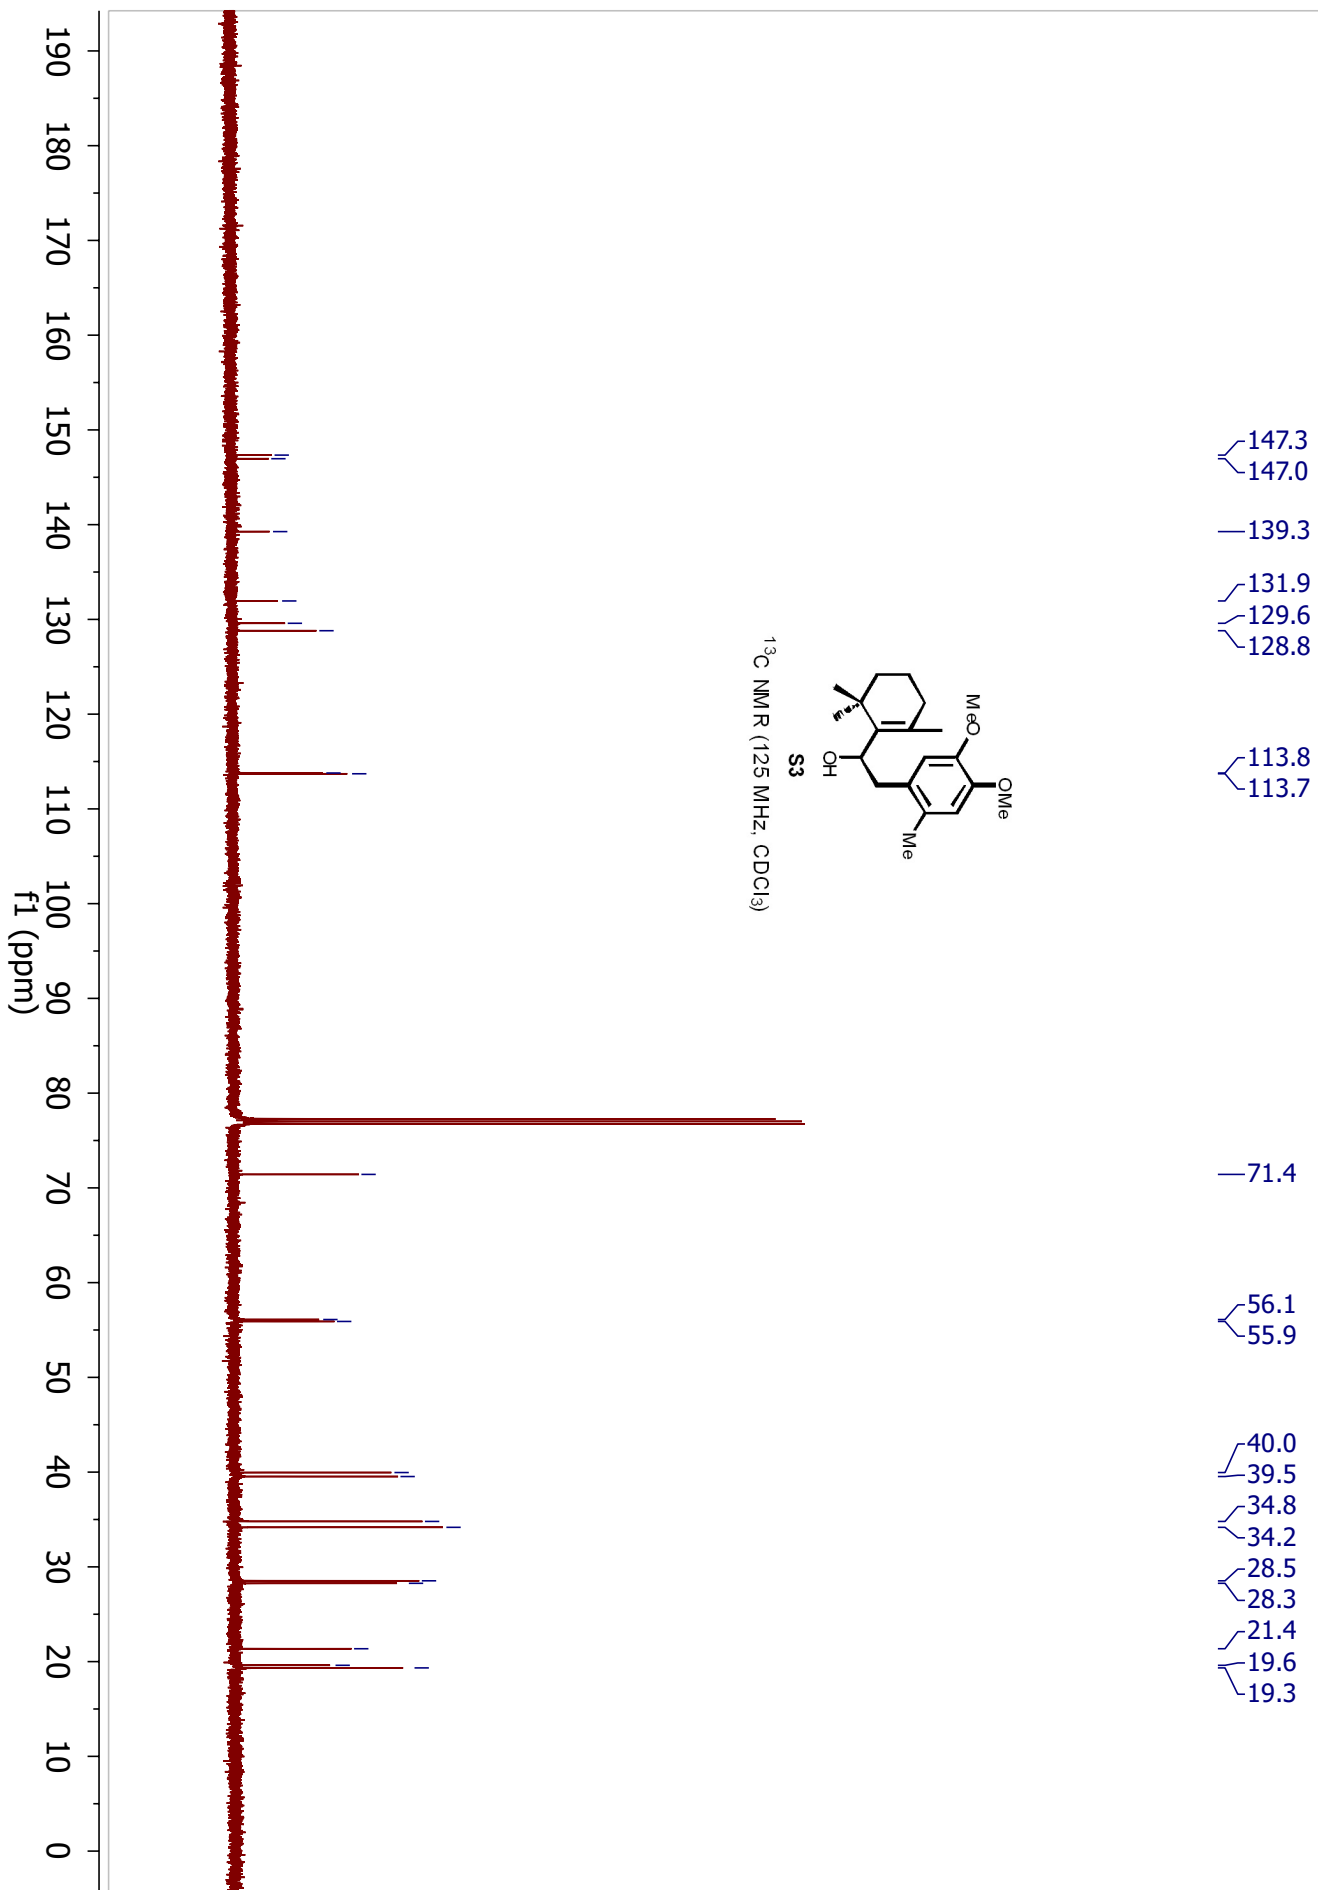

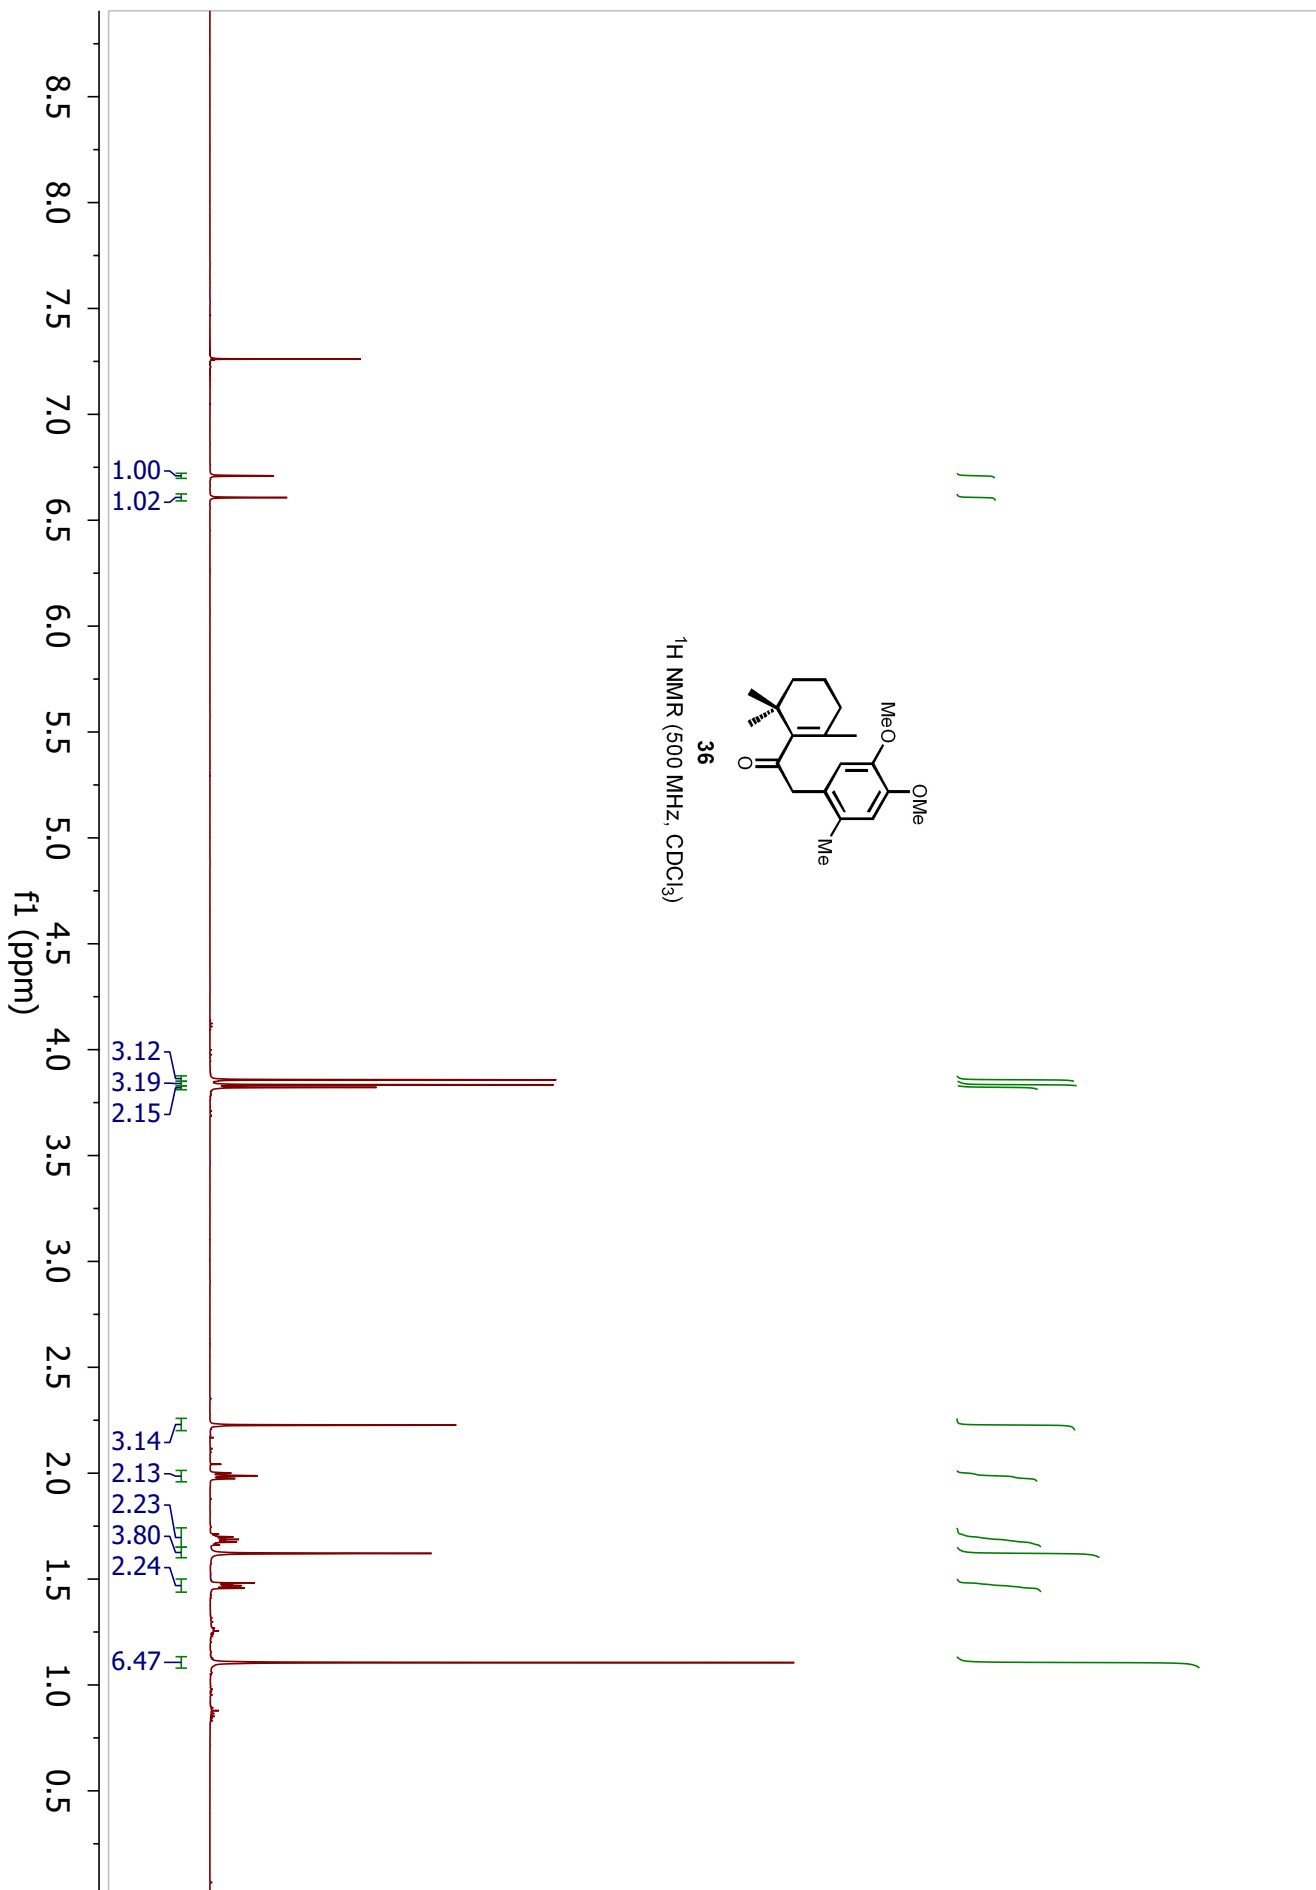

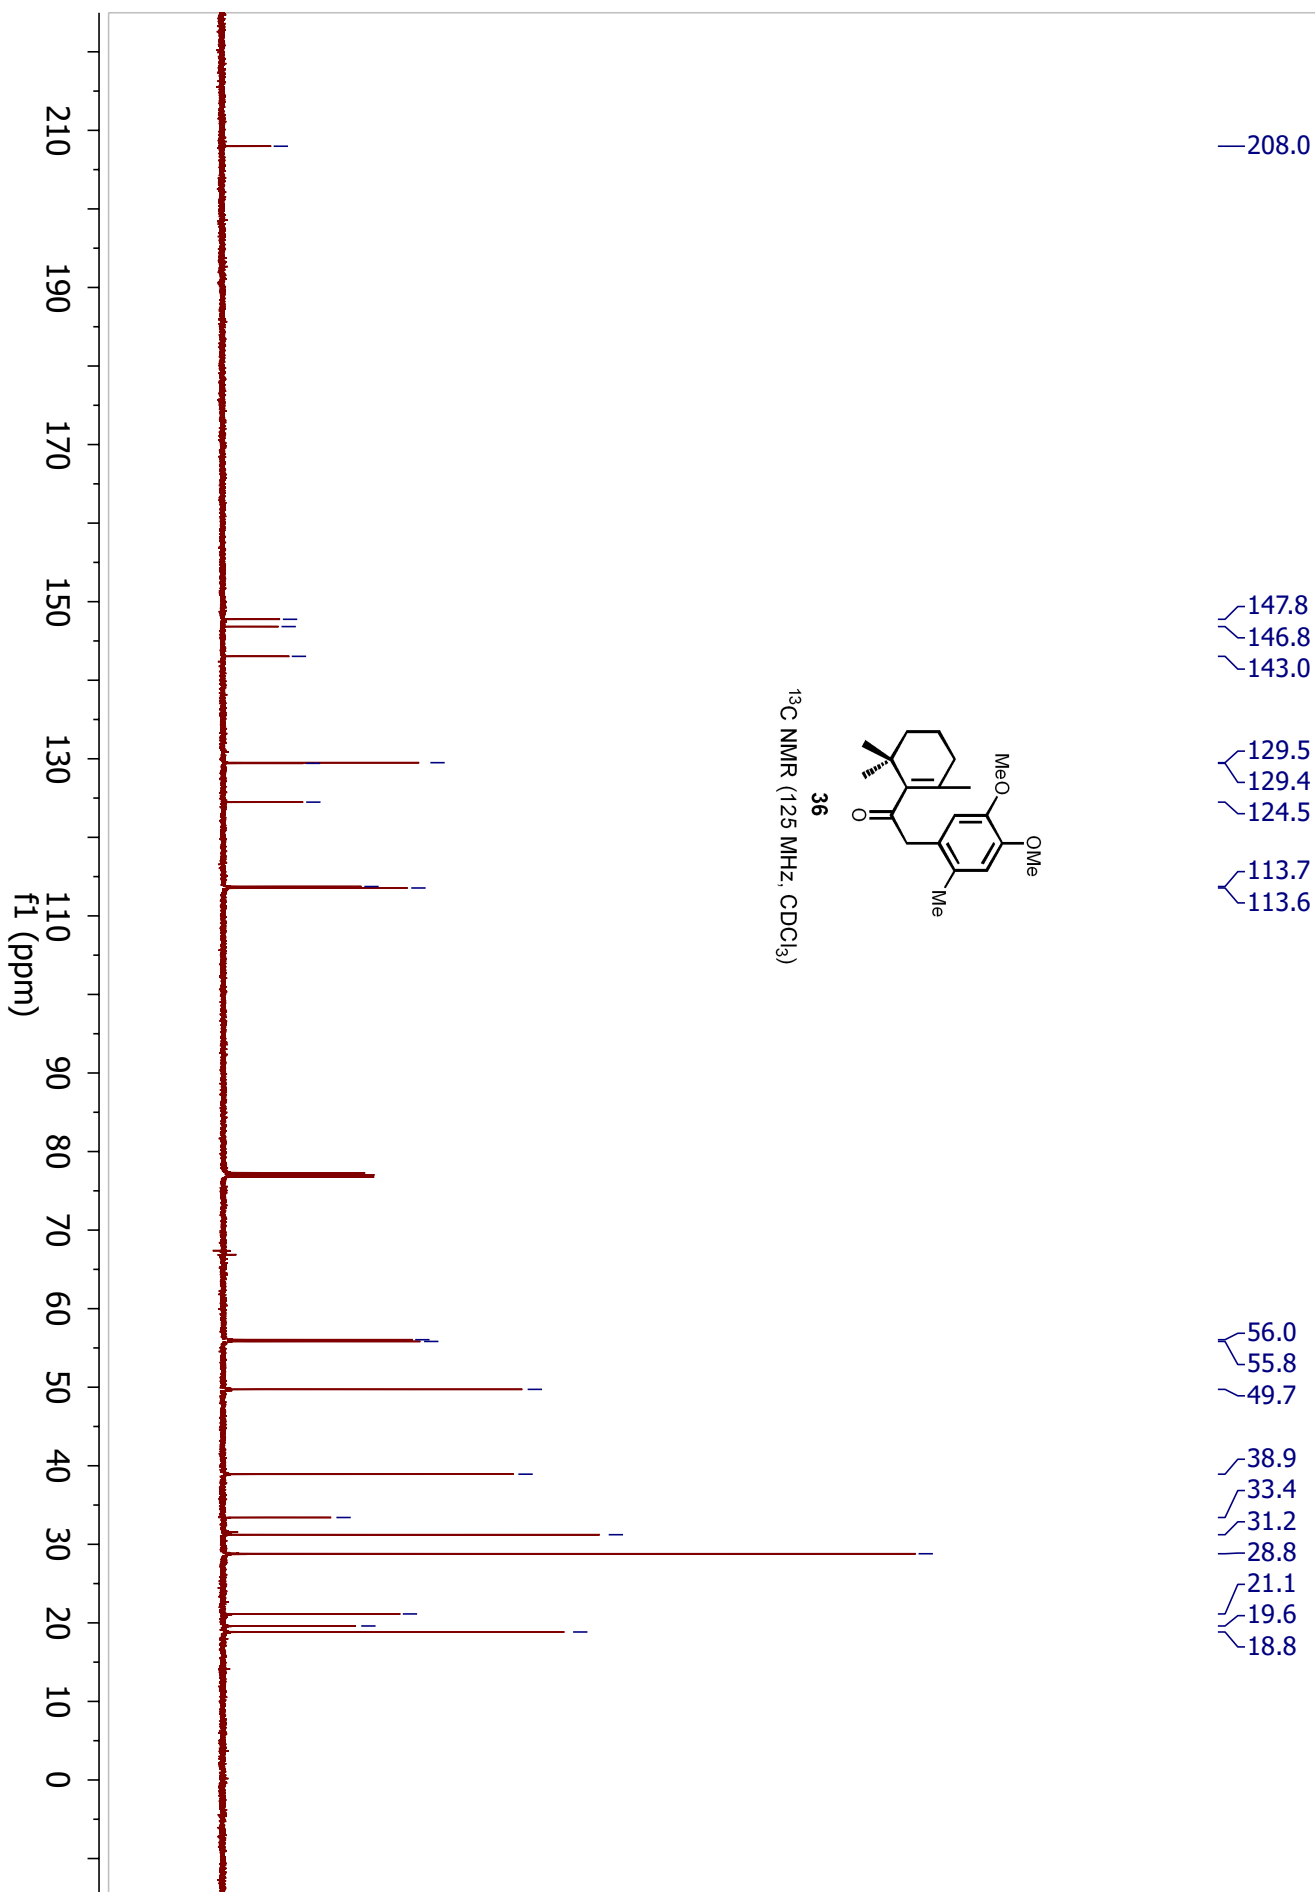

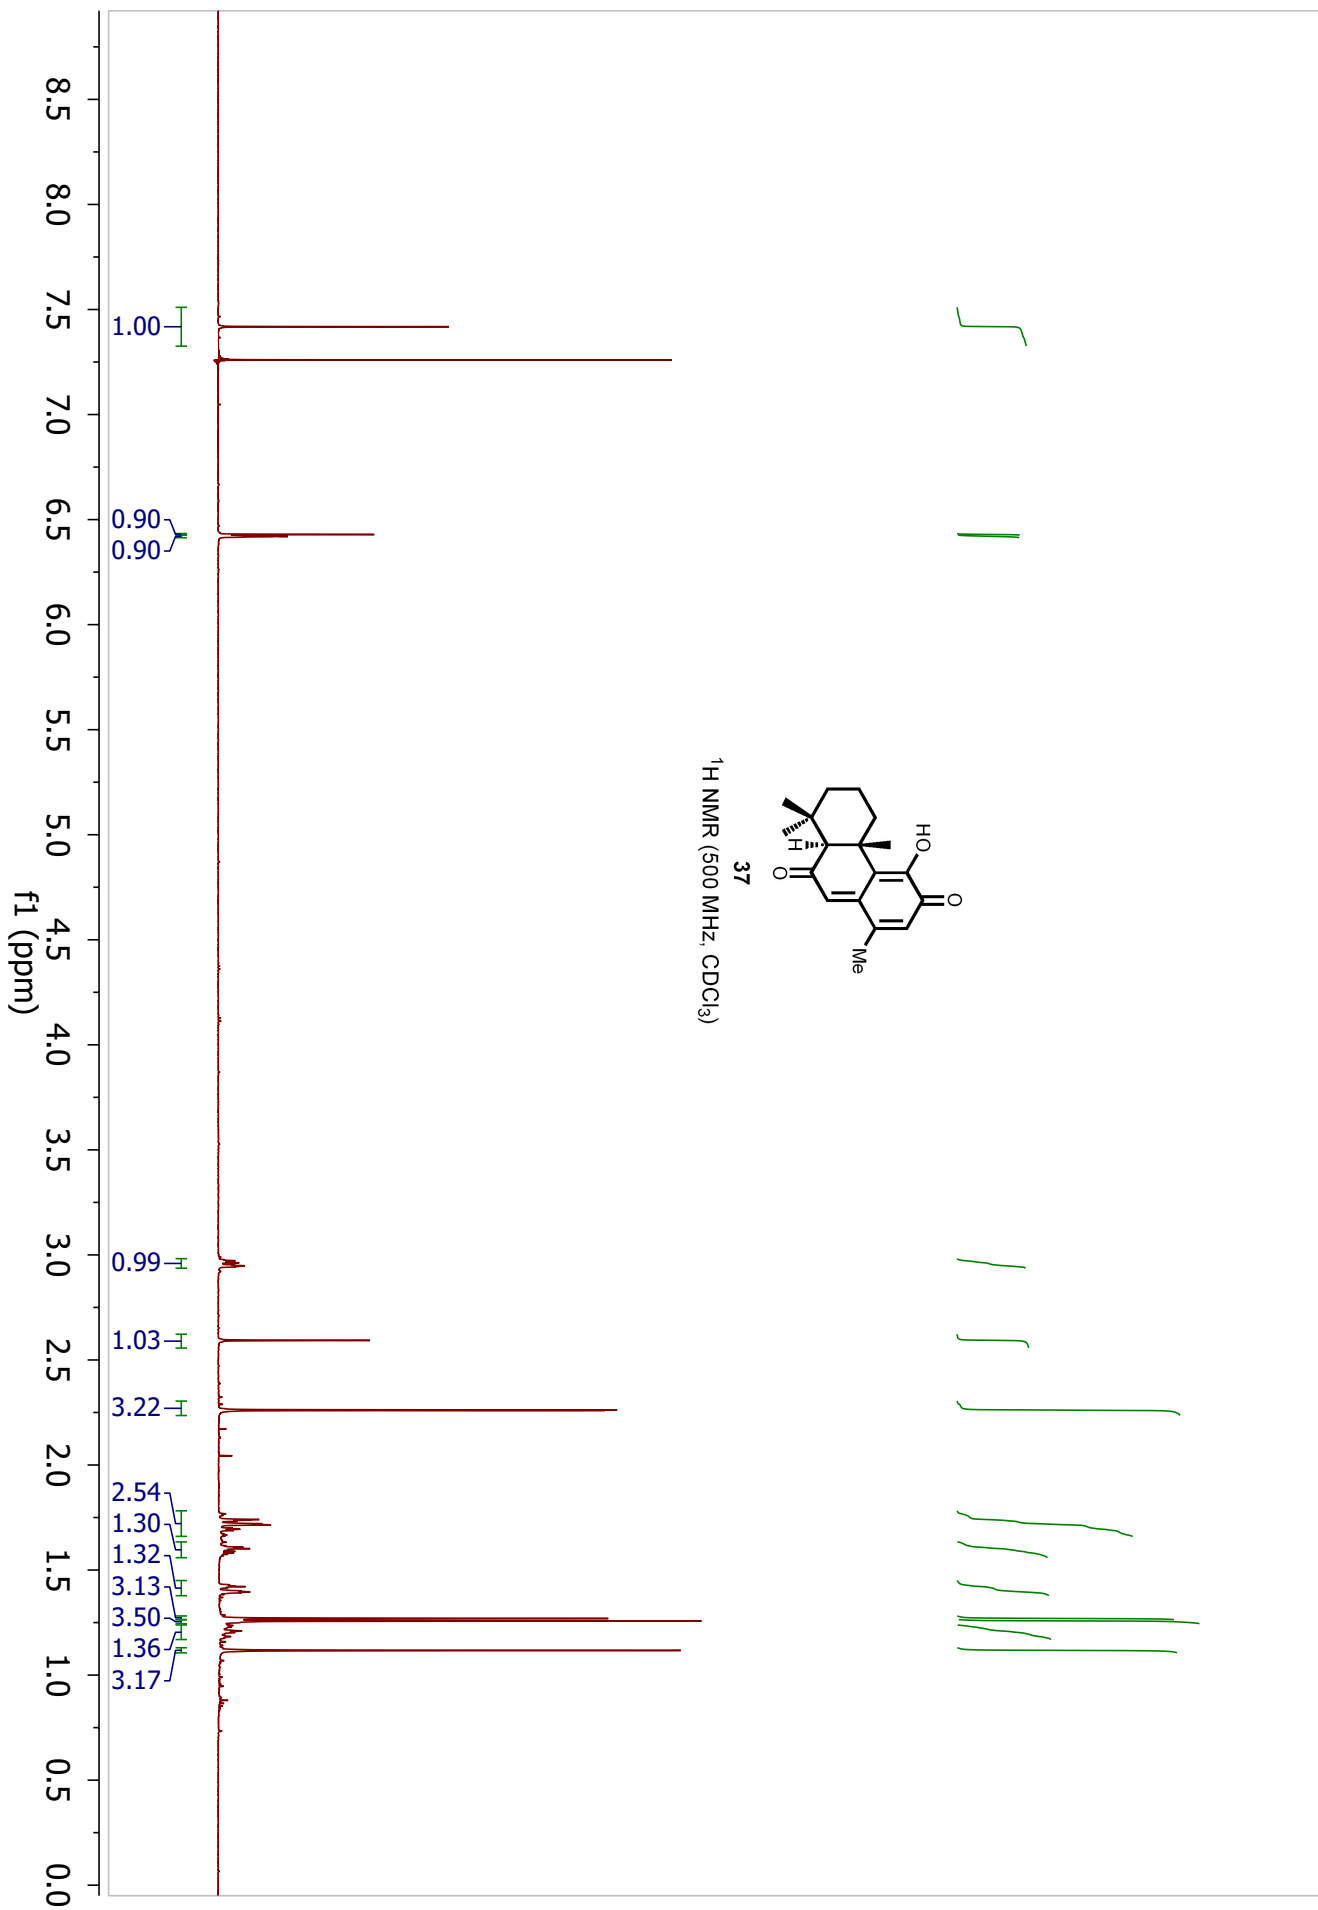

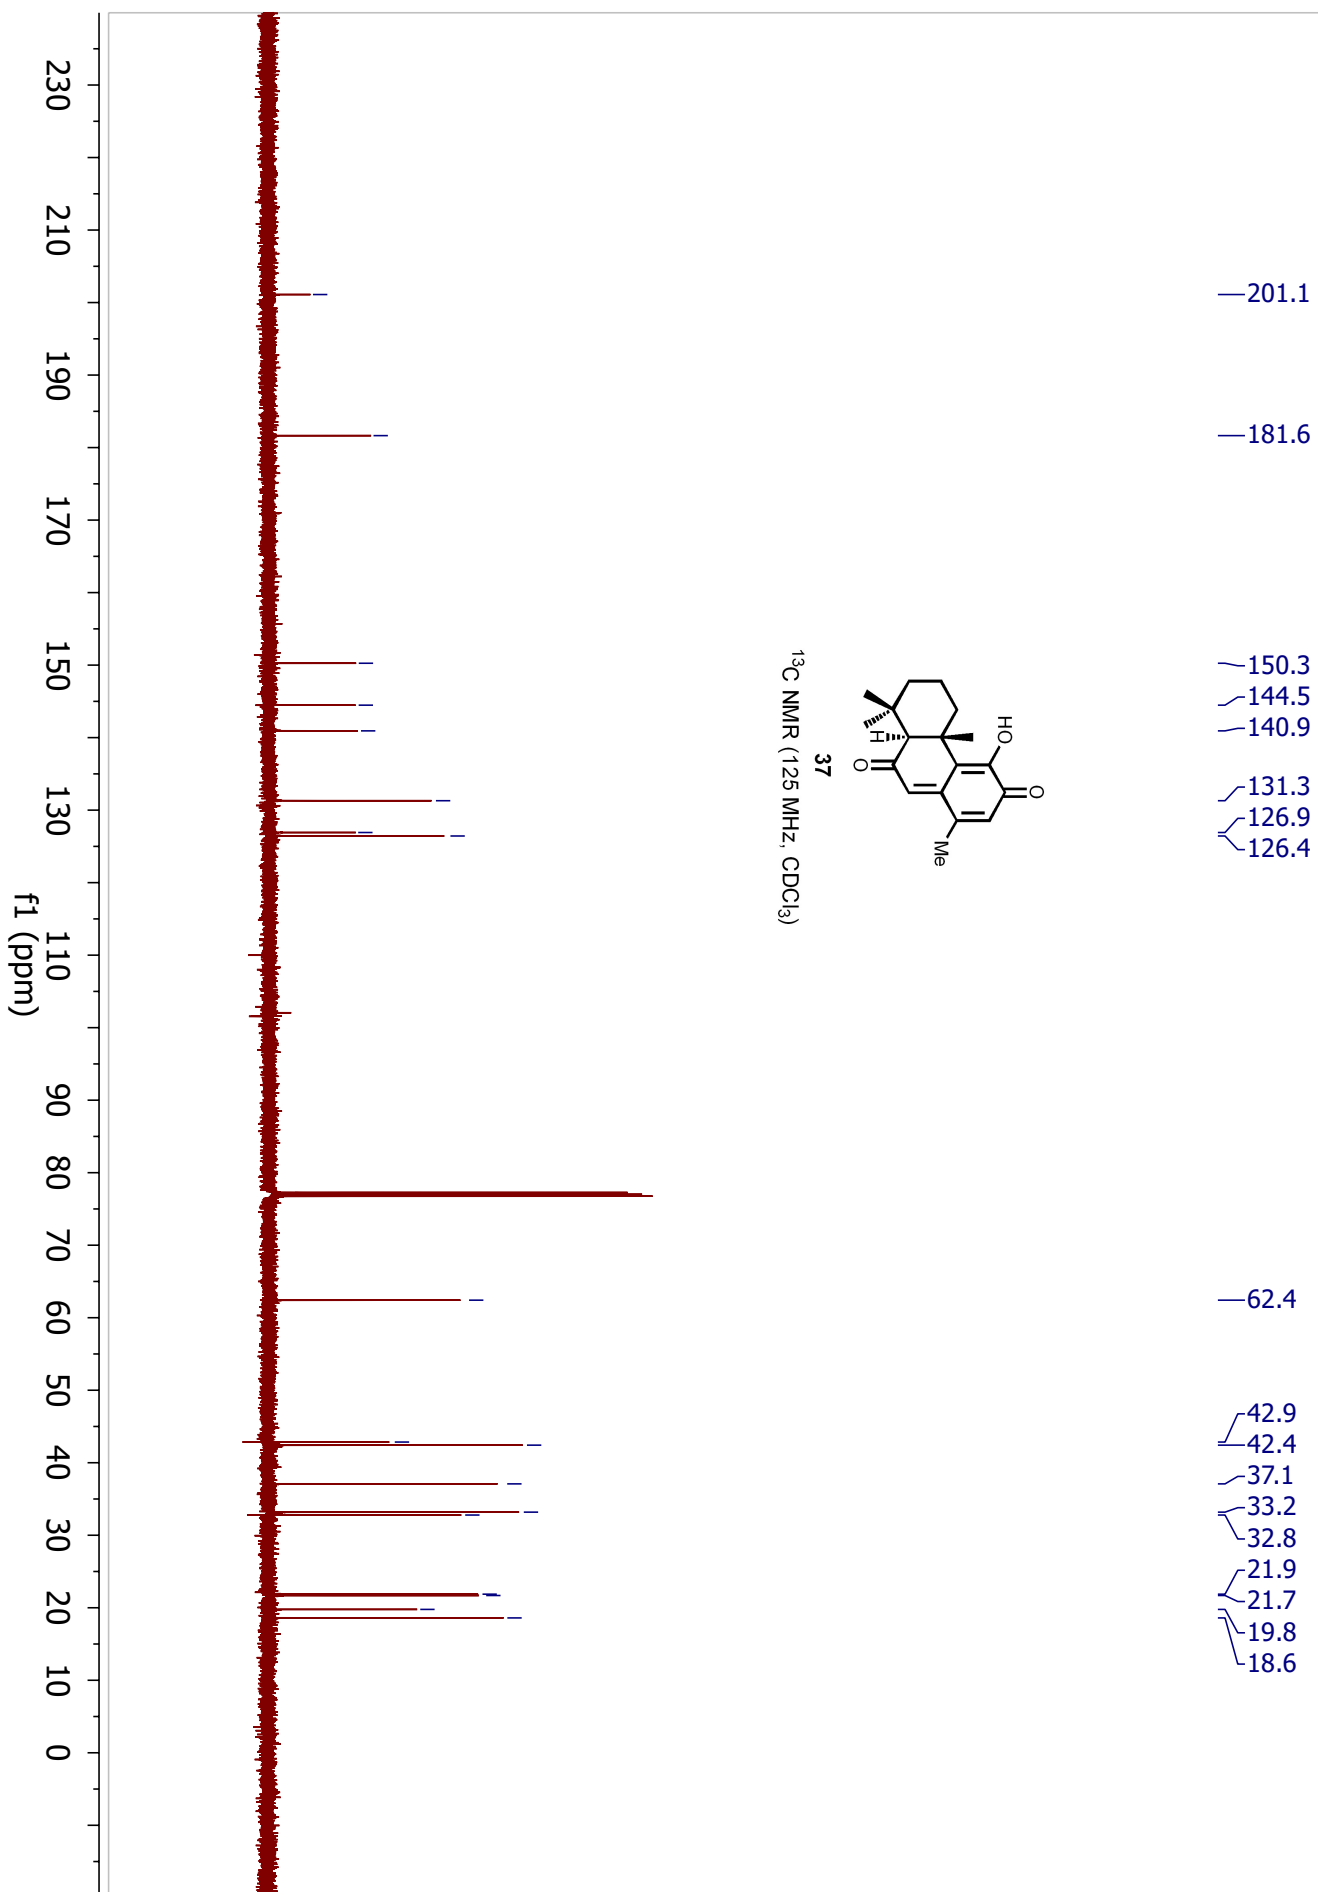

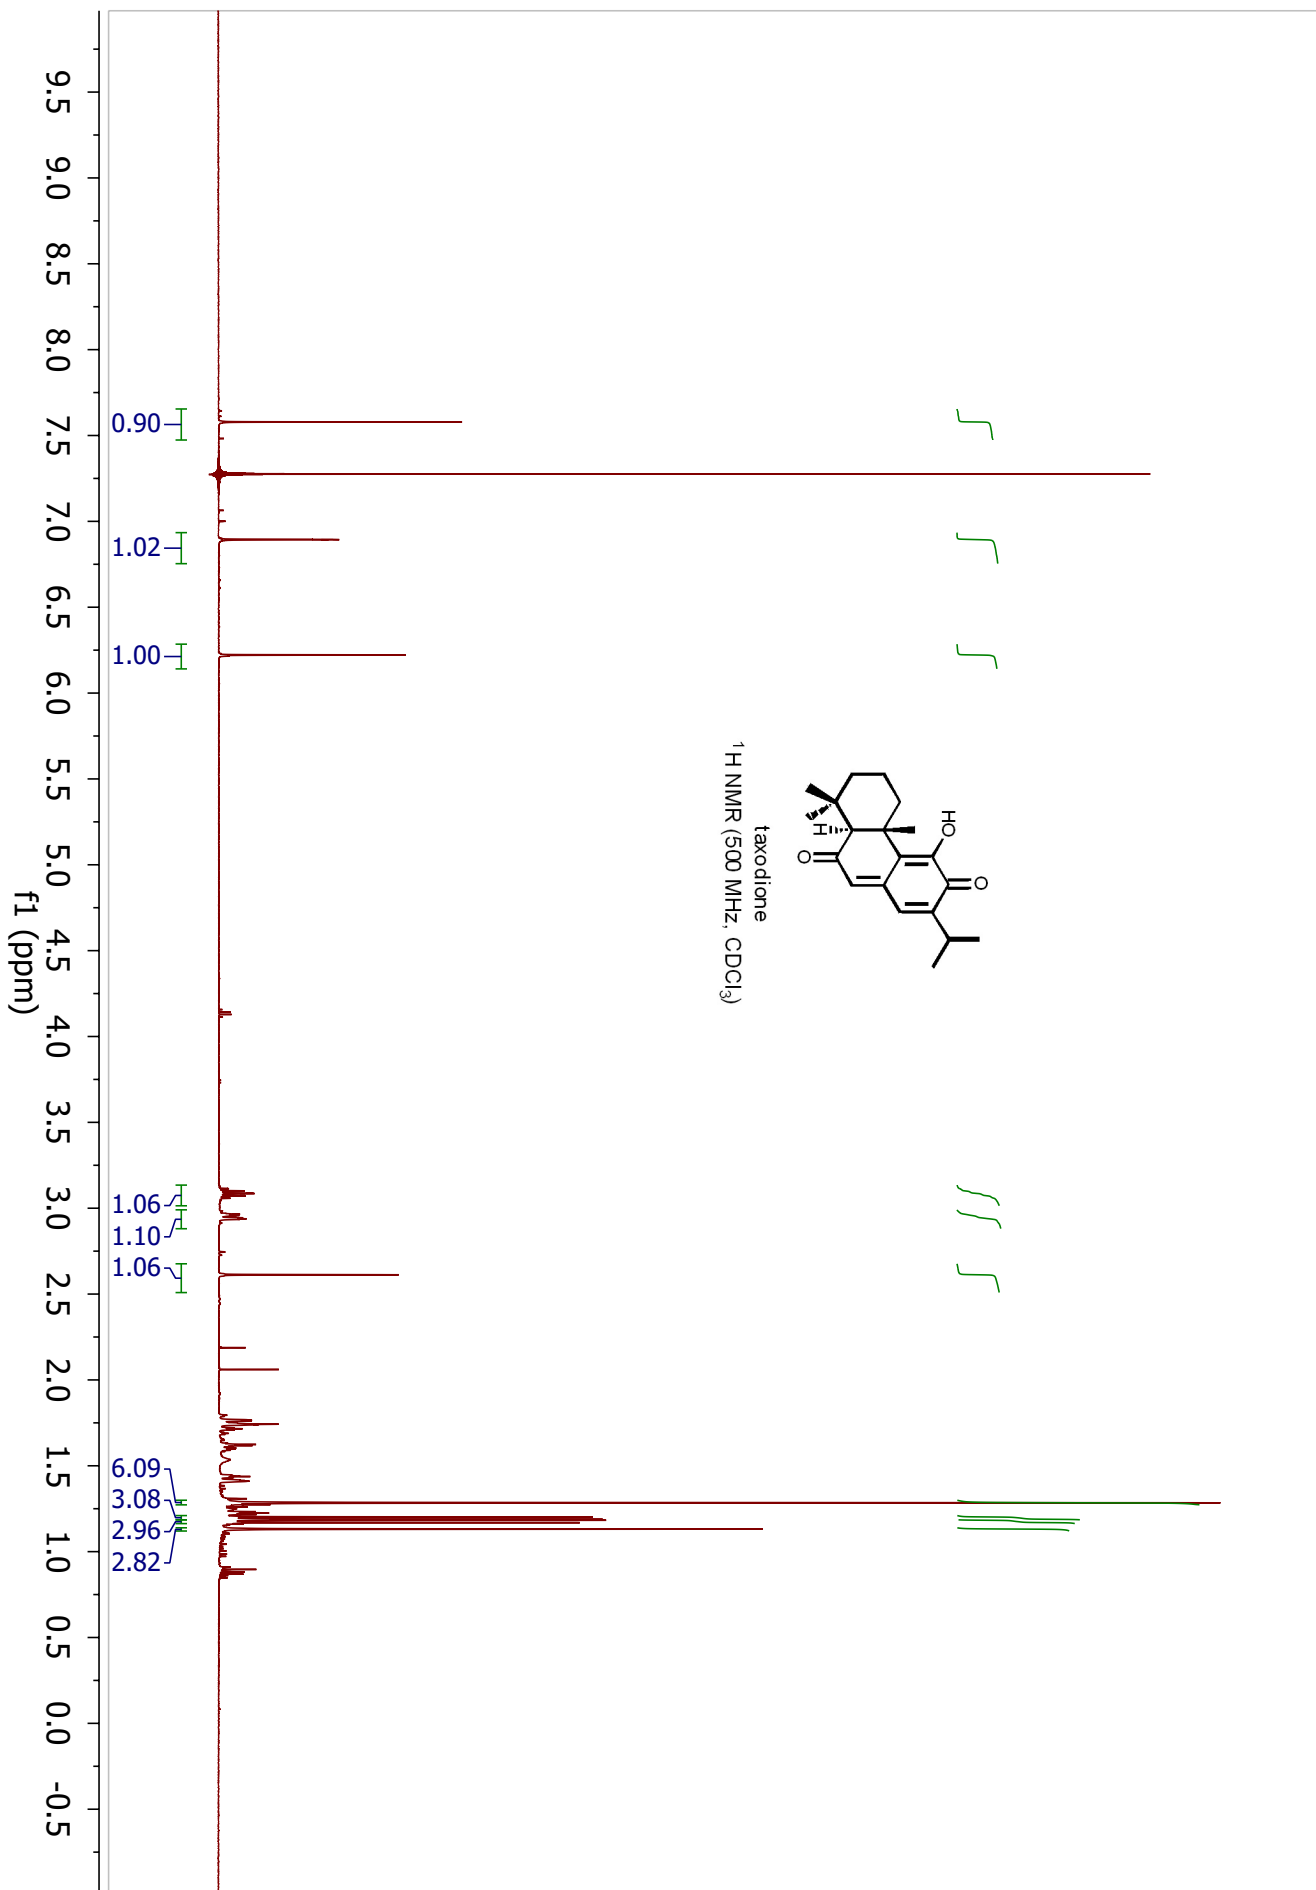

Supplement: NIHMS522414-supplement-1_si_001.pdf [file NIHMS522414-supplement-1_si_001.pdf]
